# Supplementary material
Source: publisher figshare collection journal article supplement (https://acs.figshare.com/ndownloader/files/5140612)
Supplement: Supplementary file 1 [file 5140612]

HEADER    TRANSCRIPTION                           18-OCT-01   1K74              
TITLE     CRYSTAL STRUCTURE OF THE HUMAN PPARGAMMA              
TITLE    2 BOUND WITH GW409544 
COMPND    MOL_ID: 1;                                                            
COMPND   2 MOLECULE: PEROXISOME PROLIFERATOR ACTIVATED RECEPTOR GAMMA;          
COMPND   3 CHAIN: D;                                                            
COMPND   4 FRAGMENT: LIGAND BINDING DOMAIN RESIDUES - 206 - 477;                
COMPND   5 35 LIGAND MOLECULES ADDED AT THE END
HELIX    1   1 PRO A  231  VAL A  242  1                                  12    
HELIX    2   2 ASP A  263  ARG A  285  1                                  23    
HELIX    3   3 HIS A  288  LEU A  292  5                                   5    
HELIX    4   4 PRO A  293  SER A  317  1                                  25    
HELIX    5   5 ILE A  318  VAL A  320  5                                   3    
HELIX    6   6 ARG A  334  ALA A  340  1                                   7    
HELIX    7   7 ALA A  344  LEU A  353  1                                  10    
HELIX    8   8 LEU A  353  MET A  360  1                                   8    
HELIX    9   9 ASP A  363  PHE A  376  1                                  14    
HELIX   10  10 ASN A  385  TYR A  408  1                                  24    
HELIX   11  11 GLY A  413  LEU A  420  1                                   8    
HELIX   12  12 ARG A  421  PHE A  437  1                                  17    
HELIX   13  13 PHE A  450  LEU A  455  1                                   6    
HELIX   14  14 GLU D  207  PHE D  226  1                                  20    
HELIX   15  15 THR D  229  THR D  238  1                                  10    
HELIX   16  16 ASP D  251  GLY D  258  1                                   8    
HELIX   17  17 GLU D  276  LYS D  301  1                                  26    
HELIX   18  18 GLY D  305  LEU D  309  5                                   5    
HELIX   19  19 ASP D  310  LEU D  333  1                                  24    
HELIX   20  20 ARG D  350  LEU D  356  1                                   7    
HELIX   21  21 ARG D  357  ASP D  362  5                                   6    
HELIX   22  22 PHE D  363  ALA D  376  1                                  14    
HELIX   23  23 ASP D  380  LEU D  393  1                                  14    
HELIX   24  24 ASN D  402  HIS D  425  1                                  24    
HELIX   25  25 GLN D  430  GLU D  460  1                                  31    
HELIX   26  26 HIS D  466  LYS D  474  1                                   9    
HELIX   27  27 HIS B  630  GLN B  638  1                                   9    
HELIX   28  28 HIS E  687  GLU E  696  1                                  10    
SHEET    1   A 2 GLY A 323  LEU A 325  0                                        
SHEET    2   A 2 HIS A 331  HIS A 333 -1  O  VAL A 332   N  ILE A 324           
SHEET    1   B 4 PHE D 247  ILE D 249  0                                        
SHEET    2   B 4 GLY D 346  THR D 349  1  O  PHE D 347   N  ILE D 249           
SHEET    3   B 4 GLY D 338  ILE D 341 -1  N  VAL D 339   O  MET D 348           
SHEET    4   B 4 MET D 334  ASN D 335 -1  N  ASN D 335   O  GLY D 338           
ATOM      1  H1  PRO D 206     -30.089  -2.655   0.795                  1K74
ATOM      2  H2  PRO D 206     -29.187  -1.489   0.612                  1K74
ATOM      3  N   PRO D 206     -29.859  -1.999   0.057                  1K74
ATOM      4  CA  PRO D 206     -29.756  -2.862  -1.133                  1K74
ATOM      5  CD  PRO D 206     -28.549  -1.429  -0.286                  1K74
ATOM      6  CG  PRO D 206     -27.275  -1.725  -1.068                  1K74
ATOM      7  CB  PRO D 206     -28.323  -2.678  -1.635                  1K74
ATOM      8  C   PRO D 206     -30.014  -4.347  -0.901                  1K74
ATOM      9  O   PRO D 206     -29.698  -4.693   0.236                  1K74
ATOM     10  N   GLU D 207     -30.528  -4.999  -1.946                  1K74
ATOM     11  H   GLU D 207     -30.576  -4.608  -2.877                  1K74
ATOM     12  CA  GLU D 207     -30.623  -6.446  -1.973                  1K74
ATOM     13  CB  GLU D 207     -31.371  -6.846  -3.241                  1K74
ATOM     14  CG  GLU D 207     -31.545  -8.045  -4.166                  1K74
ATOM     15  CD  GLU D 207     -31.847  -9.363  -3.466                  1K74
ATOM     16  OE1 GLU D 207     -33.002  -9.528  -3.017                  1K74
ATOM     17  OE2 GLU D 207     -30.901 -10.174  -3.389                  1K74
ATOM     18  C   GLU D 207     -29.239  -7.085  -1.974                  1K74
ATOM     19  O   GLU D 207     -28.227  -6.566  -2.444                  1K74
ATOM     20  N   SER D 208     -29.164  -8.292  -1.407                  1K74
ATOM     21  H   SER D 208     -29.968  -8.723  -0.968                  1K74
ATOM     22  CA  SER D 208     -28.074  -9.248  -1.386                  1K74
ATOM     23  CB  SER D 208     -28.351 -10.657  -0.868                  1K74
ATOM     24  OG  SER D 208     -28.585 -10.483   0.526                  1K74
ATOM     25  HG  SER D 208     -28.770 -11.385   0.798                  1K74
ATOM     26  C   SER D 208     -27.465  -9.521  -2.757                  1K74
ATOM     27  O   SER D 208     -26.241  -9.441  -2.675                  1K74
ATOM     28  N   ALA D 209     -28.109  -9.780  -3.898                  1K74
ATOM     29  H   ALA D 209     -29.101  -9.801  -3.670                  1K74
ATOM     30  CA  ALA D 209     -27.872  -9.904  -5.323                  1K74
ATOM     31  CB  ALA D 209     -29.067 -10.078  -6.257                  1K74
ATOM     32  C   ALA D 209     -27.165  -8.605  -5.694                  1K74
ATOM     33  O   ALA D 209     -26.100  -8.886  -6.242                  1K74
ATOM     34  N   ASP D 210     -27.538  -7.340  -5.480                  1K74
ATOM     35  H   ASP D 210     -28.383  -7.350  -4.923                  1K74
ATOM     36  CA  ASP D 210     -26.953  -6.049  -5.784                  1K74
ATOM     37  CB  ASP D 210     -27.878  -4.913  -5.346                  1K74
ATOM     38  CG  ASP D 210     -29.065  -4.748  -6.288                  1K74
ATOM     39  OD1 ASP D 210     -28.887  -4.908  -7.517                  1K74
ATOM     40  OD2 ASP D 210     -30.015  -4.470  -5.527                  1K74
ATOM     41  C   ASP D 210     -25.627  -5.977  -5.035                  1K74
ATOM     42  O   ASP D 210     -24.592  -5.563  -5.559                  1K74
ATOM     43  N   LEU D 211     -25.378  -6.339  -3.772                  1K74
ATOM     44  H   LEU D 211     -26.253  -6.692  -3.402                  1K74
ATOM     45  CA  LEU D 211     -24.183  -6.396  -2.948                  1K74
ATOM     46  CB  LEU D 211     -24.581  -6.731  -1.513                  1K74
ATOM     47  CG  LEU D 211     -25.396  -5.643  -0.820                  1K74
ATOM     48  CD1 LEU D 211     -25.595  -6.035   0.639                  1K74
ATOM     49  CD2 LEU D 211     -24.952  -4.189  -0.706                  1K74
ATOM     50  C   LEU D 211     -23.219  -7.455  -3.469                  1K74
ATOM     51  O   LEU D 211     -22.047  -7.091  -3.398                  1K74
ATOM     52  N   ARG D 212     -23.601  -8.634  -3.968                  1K74
ATOM     53  H   ARG D 212     -24.612  -8.711  -3.944                  1K74
ATOM     54  CA  ARG D 212     -22.863  -9.691  -4.627                  1K74
ATOM     55  CB  ARG D 212     -23.749 -10.917  -4.832                  1K74
ATOM     56  CG  ARG D 212     -24.078 -11.683  -3.554                  1K74
ATOM     57  CD  ARG D 212     -22.869 -12.337  -2.895                  1K74
ATOM     58  NE  ARG D 212     -21.695 -11.745  -2.251                  1K74
ATOM     59  HE  ARG D 212     -21.993 -10.788  -2.106                  1K74
ATOM     60  CZ  ARG D 212     -20.366 -11.891  -2.181                  1K74
ATOM     61  NH1 ARG D 212     -19.734 -12.792  -2.943                  1K74
ATOM     62  HH11ARG D 212     -20.357 -13.529  -3.241                  1K74
ATOM     63  HH12ARG D 212     -18.847 -13.176  -2.649                  1K74
ATOM     64  NH2 ARG D 212     -19.853 -11.044  -1.281                  1K74
ATOM     65  HH21ARG D 212     -20.067 -10.203  -0.769                  1K74
ATOM     66  HH22ARG D 212     -18.851 -11.197  -1.270                  1K74
ATOM     67  C   ARG D 212     -22.389  -9.154  -5.971                  1K74
ATOM     68  O   ARG D 212     -21.197  -9.451  -5.950                  1K74
ATOM     69  N   ALA D 213     -23.132  -8.514  -6.878                  1K74
ATOM     70  H   ALA D 213     -24.058  -8.365  -6.491                  1K74
ATOM     71  CA  ALA D 213     -22.847  -7.898  -8.160                  1K74
ATOM     72  CB  ALA D 213     -24.092  -7.258  -8.772                  1K74
ATOM     73  C   ALA D 213     -21.780  -6.849  -7.865                  1K74
ATOM     74  O   ALA D 213     -20.860  -7.043  -8.659                  1K74
ATOM     75  N   LEU D 214     -21.806  -5.906  -6.919                  1K74
ATOM     76  H   LEU D 214     -22.677  -5.999  -6.407                  1K74
ATOM     77  CA  LEU D 214     -20.842  -4.918  -6.475                  1K74
ATOM     78  CB  LEU D 214     -21.410  -4.075  -5.335                  1K74
ATOM     79  CG  LEU D 214     -20.558  -2.859  -4.979                  1K74
ATOM     80  CD1 LEU D 214     -20.269  -1.782  -6.021                  1K74
ATOM     81  CD2 LEU D 214     -21.254  -2.123  -3.838                  1K74
ATOM     82  C   LEU D 214     -19.575  -5.610  -5.988                  1K74
ATOM     83  O   LEU D 214     -18.729  -5.068  -6.696                  1K74
ATOM     84  N   ALA D 215     -19.454  -6.559  -5.056                  1K74
ATOM     85  H   ALA D 215     -20.427  -6.748  -4.849                  1K74
ATOM     86  CA  ALA D 215     -18.242  -7.284  -4.726                  1K74
ATOM     87  CB  ALA D 215     -18.834  -8.283  -3.732                  1K74
ATOM     88  C   ALA D 215     -17.540  -7.974  -5.891                  1K74
ATOM     89  O   ALA D 215     -16.318  -7.882  -5.791                  1K74
ATOM     90  N   LYS D 216     -18.279  -8.570  -6.834                  1K74
ATOM     91  H   LYS D 216     -19.290  -8.522  -6.781                  1K74
ATOM     92  CA  LYS D 216     -17.843  -9.240  -8.044                  1K74
ATOM     93  CB  LYS D 216     -18.971  -9.997  -8.742                  1K74
ATOM     94  CG  LYS D 216     -18.424 -11.299  -9.321                  1K74
ATOM     95  CD  LYS D 216     -17.235 -11.543 -10.244                  1K74
ATOM     96  CE  LYS D 216     -16.717 -12.371 -11.415                  1K74
ATOM     97  NZ  LYS D 216     -17.785 -12.182 -12.409                  1K74
ATOM     98  HZ1 LYS D 216     -17.628 -11.278 -12.832                  1K74
ATOM     99  HZ2 LYS D 216     -17.518 -12.973 -12.978                  1K74
ATOM    100  HZ3 LYS D 216     -18.692 -12.415 -12.029                  1K74
ATOM    101  C   LYS D 216     -17.305  -8.150  -8.962                  1K74
ATOM    102  O   LYS D 216     -16.162  -8.508  -9.233                  1K74
ATOM    103  N   HIS D 217     -17.951  -7.048  -9.352                  1K74
ATOM    104  H   HIS D 217     -18.834  -7.048  -8.856                  1K74
ATOM    105  CA  HIS D 217     -17.472  -5.952 -10.173                  1K74
ATOM    106  CB  HIS D 217     -18.499  -4.820 -10.156                  1K74
ATOM    107  CG  HIS D 217     -18.223  -3.498 -10.820                  1K74
ATOM    108  ND1 HIS D 217     -18.011  -3.593 -12.186                  1K74
ATOM    109  HD1 HIS D 217     -18.288  -4.275 -12.879                  1K74
ATOM    110  CE1 HIS D 217     -17.329  -2.600 -12.777                  1K74
ATOM    111  NE2 HIS D 217     -17.095  -2.159 -11.540                  1K74
ATOM    112  CD2 HIS D 217     -17.474  -2.497 -10.245                  1K74
ATOM    113  C   HIS D 217     -16.141  -5.451  -9.623                  1K74
ATOM    114  O   HIS D 217     -15.317  -5.473 -10.535                  1K74
ATOM    115  N   LEU D 218     -16.008  -5.097  -8.342                  1K74
ATOM    116  H   LEU D 218     -16.842  -5.286  -7.801                  1K74
ATOM    117  CA  LEU D 218     -14.803  -4.629  -7.687                  1K74
ATOM    118  CB  LEU D 218     -15.139  -4.298  -6.234                  1K74
ATOM    119  CG  LEU D 218     -16.096  -3.118  -6.086                  1K74
ATOM    120  CD1 LEU D 218     -16.348  -3.029  -4.585                  1K74
ATOM    121  CD2 LEU D 218     -15.679  -1.729  -6.562                  1K74
ATOM    122  C   LEU D 218     -13.686  -5.663  -7.698                  1K74
ATOM    123  O   LEU D 218     -12.698  -4.987  -7.974                  1K74
ATOM    124  N   TYR D 219     -13.896  -6.961  -7.463                  1K74
ATOM    125  H   TYR D 219     -14.873  -7.199  -7.343                  1K74
ATOM    126  CA  TYR D 219     -12.913  -8.005  -7.663                  1K74
ATOM    127  CB  TYR D 219     -13.483  -9.391  -7.362                  1K74
ATOM    128  CG  TYR D 219     -12.559 -10.583  -7.296                  1K74
ATOM    129  CD1 TYR D 219     -11.332 -10.454  -6.622                  1K74
ATOM    130  CE1 TYR D 219     -10.335 -11.420  -6.839                  1K74
ATOM    131  CZ  TYR D 219     -10.521 -12.417  -7.814                  1K74
ATOM    132  OH  TYR D 219      -9.491 -13.268  -8.085                  1K74
ATOM    133  HH  TYR D 219      -8.828 -13.265  -7.392                  1K74
ATOM    134  CE2 TYR D 219     -11.652 -12.369  -8.649                  1K74
ATOM    135  CD2 TYR D 219     -12.657 -11.412  -8.427                  1K74
ATOM    136  C   TYR D 219     -12.394  -8.036  -9.096                  1K74
ATOM    137  O   TYR D 219     -11.168  -8.117  -9.126                  1K74
ATOM    138  N   ASP D 220     -13.189  -7.978 -10.167                  1K74
ATOM    139  H   ASP D 220     -14.171  -7.930  -9.925                  1K74
ATOM    140  CA  ASP D 220     -12.813  -8.064 -11.565                  1K74
ATOM    141  CB  ASP D 220     -14.053  -8.124 -12.454                  1K74
ATOM    142  CG  ASP D 220     -14.672  -9.514 -12.456                  1K74
ATOM    143  OD1 ASP D 220     -14.075 -10.598 -12.276                  1K74
ATOM    144  OD2 ASP D 220     -15.902  -9.478 -12.672                  1K74
ATOM    145  C   ASP D 220     -11.981  -6.850 -11.956                  1K74
ATOM    146  O   ASP D 220     -10.925  -7.199 -12.481                  1K74
ATOM    147  N   SER D 221     -12.403  -5.607 -11.706                  1K74
ATOM    148  H   SER D 221     -13.264  -5.548 -11.174                  1K74
ATOM    149  CA  SER D 221     -11.629  -4.397 -11.899                  1K74
ATOM    150  CB  SER D 221     -12.616  -3.291 -11.545                  1K74
ATOM    151  OG  SER D 221     -12.977  -3.109 -10.178                  1K74
ATOM    152  HG  SER D 221     -13.485  -2.296 -10.169                  1K74
ATOM    153  C   SER D 221     -10.409  -4.389 -10.986                  1K74
ATOM    154  O   SER D 221      -9.486  -3.799 -11.542                  1K74
ATOM    155  N   TYR D 222     -10.166  -4.893  -9.774                  1K74
ATOM    156  H   TYR D 222     -11.039  -5.369  -9.577                  1K74
ATOM    157  CA  TYR D 222      -9.077  -4.997  -8.822                  1K74
ATOM    158  CB  TYR D 222      -9.542  -5.642  -7.520                  1K74
ATOM    159  CG  TYR D 222      -8.551  -6.148  -6.501                  1K74
ATOM    160  CD1 TYR D 222      -7.925  -7.393  -6.692                  1K74
ATOM    161  CE1 TYR D 222      -6.854  -7.687  -5.832                  1K74
ATOM    162  CZ  TYR D 222      -6.530  -6.893  -4.717                  1K74
ATOM    163  OH  TYR D 222      -5.386  -7.195  -4.039                  1K74
ATOM    164  HH  TYR D 222      -5.298  -8.154  -4.061                  1K74
ATOM    165  CE2 TYR D 222      -7.231  -5.682  -4.576                  1K74
ATOM    166  CD2 TYR D 222      -8.210  -5.242  -5.483                  1K74
ATOM    167  C   TYR D 222      -8.068  -5.863  -9.565                  1K74
ATOM    168  O   TYR D 222      -6.985  -5.281  -9.606                  1K74
ATOM    169  N   ILE D 223      -8.321  -7.067 -10.089                  1K74
ATOM    170  H   ILE D 223      -9.290  -7.343  -9.976                  1K74
ATOM    171  CA  ILE D 223      -7.496  -8.017 -10.809                  1K74
ATOM    172  CB  ILE D 223      -8.154  -9.305 -11.299                  1K74
ATOM    173  CG2 ILE D 223      -7.865 -10.459 -12.252                  1K74
ATOM    174  CG1 ILE D 223      -8.378 -10.207 -10.088                  1K74
ATOM    175  CD  ILE D 223      -7.687 -10.638  -8.801                  1K74
ATOM    176  C   ILE D 223      -6.964  -7.278 -12.032                  1K74
ATOM    177  O   ILE D 223      -5.783  -7.442 -12.331                  1K74
ATOM    178  N   LYS D 224      -7.693  -6.449 -12.783                  1K74
ATOM    179  H   LYS D 224      -8.598  -6.332 -12.344                  1K74
ATOM    180  CA  LYS D 224      -7.363  -5.679 -13.967                  1K74
ATOM    181  CB  LYS D 224      -8.719  -5.313 -14.564                  1K74
ATOM    182  CG  LYS D 224      -9.236  -6.542 -15.307                  1K74
ATOM    183  CD  LYS D 224     -10.670  -6.169 -15.664                  1K74
ATOM    184  CE  LYS D 224     -11.191  -7.265 -16.591                  1K74
ATOM    185  NZ  LYS D 224     -10.606  -7.456 -17.928                  1K74
ATOM    186  HZ1 LYS D 224      -9.636  -7.695 -17.777                  1K74
ATOM    187  HZ2 LYS D 224     -11.056  -8.213 -18.421                  1K74
ATOM    188  HZ3 LYS D 224     -10.641  -6.581 -18.430                  1K74
ATOM    189  C   LYS D 224      -6.553  -4.436 -13.623                  1K74
ATOM    190  O   LYS D 224      -5.898  -3.983 -14.559                  1K74
ATOM    191  N   SER D 225      -6.527  -3.865 -12.417                  1K74
ATOM    192  H   SER D 225      -6.968  -4.331 -11.635                  1K74
ATOM    193  CA  SER D 225      -5.848  -2.654 -11.995                  1K74
ATOM    194  CB  SER D 225      -6.626  -1.817 -10.981                  1K74
ATOM    195  OG  SER D 225      -7.728  -1.168 -11.608                  1K74
ATOM    196  HG  SER D 225      -8.431  -0.999 -10.984                  1K74
ATOM    197  C   SER D 225      -4.519  -3.050 -11.364                  1K74
ATOM    198  O   SER D 225      -3.513  -2.422 -11.686                  1K74
ATOM    199  N   PHE D 226      -4.342  -4.035 -10.480                  1K74
ATOM    200  H   PHE D 226      -5.187  -4.562 -10.297                  1K74
ATOM    201  CA  PHE D 226      -3.216  -4.420  -9.651                  1K74
ATOM    202  CB  PHE D 226      -3.673  -4.565  -8.200                  1K74
ATOM    203  CG  PHE D 226      -4.307  -3.357  -7.555                  1K74
ATOM    204  CD1 PHE D 226      -3.676  -2.101  -7.568                  1K74
ATOM    205  CE1 PHE D 226      -4.406  -0.967  -7.170                  1K74
ATOM    206  CZ  PHE D 226      -5.771  -1.079  -6.853                  1K74
ATOM    207  CE2 PHE D 226      -6.419  -2.320  -6.982                  1K74
ATOM    208  CD2 PHE D 226      -5.698  -3.460  -7.377                  1K74
ATOM    209  C   PHE D 226      -2.714  -5.738 -10.229                  1K74
ATOM    210  O   PHE D 226      -3.336  -6.787 -10.067                  1K74
ATOM    211  N   PRO D 227      -1.568  -5.647 -10.916                  1K74
ATOM    212  CA  PRO D 227      -0.827  -6.756 -11.492                  1K74
ATOM    213  CD  PRO D 227      -0.679  -4.568 -11.305                  1K74
ATOM    214  CG  PRO D 227       0.053  -4.808 -12.621                  1K74
ATOM    215  CB  PRO D 227       0.441  -6.205 -12.144                  1K74
ATOM    216  C   PRO D 227      -0.421  -7.821 -10.476                  1K74
ATOM    217  O   PRO D 227      -0.792  -8.958 -10.767                  1K74
ATOM    218  N   LEU D 228       0.259  -7.469  -9.380                  1K74
ATOM    219  H   LEU D 228       0.500  -6.488  -9.328                  1K74
ATOM    220  CA  LEU D 228       0.556  -8.303  -8.233                  1K74
ATOM    221  CB  LEU D 228       1.895  -7.879  -7.635                  1K74
ATOM    222  CG  LEU D 228       2.815  -8.998  -7.157                  1K74
ATOM    223  CD1 LEU D 228       4.000  -8.390  -6.414                  1K74
ATOM    224  CD2 LEU D 228       2.533 -10.165  -6.220                  1K74
ATOM    225  C   LEU D 228      -0.536  -8.152  -7.183                  1K74
ATOM    226  O   LEU D 228      -0.866  -7.283  -6.379                  1K74
ATOM    227  N   THR D 229      -1.227  -9.292  -7.242                  1K74
ATOM    228  H   THR D 229      -1.049 -10.169  -7.711                  1K74
ATOM    229  CA  THR D 229      -2.258  -9.668  -6.290                  1K74
ATOM    230  CB  THR D 229      -3.284 -10.713  -6.723                  1K74
ATOM    231  CG2 THR D 229      -4.140 -10.266  -7.904                  1K74
ATOM    232  OG1 THR D 229      -2.754 -11.970  -7.138                  1K74
ATOM    233  HG1 THR D 229      -3.456 -12.614  -7.236                  1K74
ATOM    234  C   THR D 229      -1.672 -10.246  -5.007                  1K74
ATOM    235  O   THR D 229      -0.563 -10.778  -4.977                  1K74
ATOM    236  N   LYS D 230      -2.289 -10.251  -3.823                  1K74
ATOM    237  H   LYS D 230      -3.293 -10.083  -3.850                  1K74
ATOM    238  CA  LYS D 230      -2.054 -10.895  -2.544                  1K74
ATOM    239  CB  LYS D 230      -3.021 -10.850  -1.362                  1K74
ATOM    240  CG  LYS D 230      -2.564 -11.334   0.012                  1K74
ATOM    241  CD  LYS D 230      -3.650 -11.111   1.055                  1K74
ATOM    242  CE  LYS D 230      -3.048 -11.768   2.294                  1K74
ATOM    243  NZ  LYS D 230      -3.882 -11.568   3.488                  1K74
ATOM    244  HZ1 LYS D 230      -4.825 -11.805   3.201                  1K74
ATOM    245  HZ2 LYS D 230      -3.650 -12.070   4.332                  1K74
ATOM    246  HZ3 LYS D 230      -3.956 -10.563   3.559                  1K74
ATOM    247  C   LYS D 230      -1.897 -12.398  -2.748                  1K74
ATOM    248  O   LYS D 230      -0.870 -12.768  -2.180                  1K74
ATOM    249  N   ALA D 231      -2.685 -13.245  -3.415                  1K74
ATOM    250  H   ALA D 231      -3.471 -12.682  -3.723                  1K74
ATOM    251  CA  ALA D 231      -2.595 -14.646  -3.782                  1K74
ATOM    252  CB  ALA D 231      -3.766 -14.995  -4.699                  1K74
ATOM    253  C   ALA D 231      -1.273 -14.885  -4.504                  1K74
ATOM    254  O   ALA D 231      -0.678 -15.844  -4.015                  1K74
ATOM    255  N   LYS D 232      -0.831 -14.126  -5.512                  1K74
ATOM    256  H   LYS D 232      -1.385 -13.292  -5.657                  1K74
ATOM    257  CA  LYS D 232       0.447 -14.187  -6.197                  1K74
ATOM    258  CB  LYS D 232       0.493 -13.216  -7.375                  1K74
ATOM    259  CG  LYS D 232      -0.320 -13.770  -8.542                  1K74
ATOM    260  CD  LYS D 232      -0.479 -12.641  -9.554                  1K74
ATOM    261  CE  LYS D 232      -1.499 -13.117 -10.584                  1K74
ATOM    262  NZ  LYS D 232      -1.871 -12.086 -11.565                  1K74
ATOM    263  HZ1 LYS D 232      -1.042 -11.781 -12.056                  1K74
ATOM    264  HZ2 LYS D 232      -2.585 -12.377 -12.218                  1K74
ATOM    265  HZ3 LYS D 232      -2.181 -11.285 -11.033                  1K74
ATOM    266  C   LYS D 232       1.529 -13.822  -5.186                  1K74
ATOM    267  O   LYS D 232       2.461 -14.613  -5.320                  1K74
ATOM    268  N   ALA D 233       1.588 -12.866  -4.253                  1K74
ATOM    269  H   ALA D 233       0.642 -12.508  -4.277                  1K74
ATOM    270  CA  ALA D 233       2.585 -12.391  -3.312                  1K74
ATOM    271  CB  ALA D 233       2.168 -11.132  -2.557                  1K74
ATOM    272  C   ALA D 233       2.781 -13.544  -2.335                  1K74
ATOM    273  O   ALA D 233       3.943 -13.892  -2.133                  1K74
ATOM    274  N   ARG D 234       1.888 -14.267  -1.654                  1K74
ATOM    275  H   ARG D 234       0.983 -13.889  -1.914                  1K74
ATOM    276  CA  ARG D 234       1.828 -15.353  -0.694                  1K74
ATOM    277  CB  ARG D 234       0.430 -15.568  -0.116                  1K74
ATOM    278  CG  ARG D 234      -0.432 -14.524   0.583                  1K74
ATOM    279  CD  ARG D 234       0.369 -13.435   1.290                  1K74
ATOM    280  NE  ARG D 234       1.169 -13.647   2.499                  1K74
ATOM    281  HE  ARG D 234       0.952 -14.591   2.790                  1K74
ATOM    282  CZ  ARG D 234       1.680 -12.755   3.358                  1K74
ATOM    283  NH1 ARG D 234       1.580 -11.426   3.231                  1K74
ATOM    284  HH11ARG D 234       1.716 -11.198   2.254                  1K74
ATOM    285  HH12ARG D 234       2.403 -10.948   3.574                  1K74
ATOM    286  NH2 ARG D 234       2.321 -13.293   4.404                  1K74
ATOM    287  HH21ARG D 234       2.168 -14.216   4.785                  1K74
ATOM    288  HH22ARG D 234       2.743 -12.605   5.014                  1K74
ATOM    289  C   ARG D 234       2.268 -16.599  -1.449                  1K74
ATOM    290  O   ARG D 234       3.030 -16.852  -0.522                  1K74
ATOM    291  N   ALA D 235       1.890 -17.066  -2.644                  1K74
ATOM    292  H   ALA D 235       1.295 -16.320  -2.983                  1K74
ATOM    293  CA  ALA D 235       2.485 -18.164  -3.383                  1K74
ATOM    294  CB  ALA D 235       1.885 -18.089  -4.786                  1K74
ATOM    295  C   ALA D 235       3.995 -17.951  -3.382                  1K74
ATOM    296  O   ALA D 235       4.557 -19.002  -3.077                  1K74
ATOM    297  N   ILE D 236       4.672 -16.827  -3.641                  1K74
ATOM    298  H   ILE D 236       4.019 -16.057  -3.721                  1K74
ATOM    299  CA  ILE D 236       6.076 -16.486  -3.770                  1K74
ATOM    300  CB  ILE D 236       6.433 -15.132  -4.379                  1K74
ATOM    301  CG2 ILE D 236       7.883 -14.690  -4.563                  1K74
ATOM    302  CG1 ILE D 236       5.952 -14.852  -5.801                  1K74
ATOM    303  CD  ILE D 236       5.450 -13.661  -6.609                  1K74
ATOM    304  C   ILE D 236       6.557 -16.546  -2.325                  1K74
ATOM    305  O   ILE D 236       7.476 -17.359  -2.386                  1K74
ATOM    306  N   LEU D 237       6.070 -15.874  -1.279                  1K74
ATOM    307  H   LEU D 237       5.223 -15.397  -1.555                  1K74
ATOM    308  CA  LEU D 237       6.621 -15.937   0.059                  1K74
ATOM    309  CB  LEU D 237       5.705 -15.064   0.912                  1K74
ATOM    310  CG  LEU D 237       6.064 -13.663   1.396                  1K74
ATOM    311  CD1 LEU D 237       7.397 -13.040   1.004                  1K74
ATOM    312  CD2 LEU D 237       4.990 -12.730   0.846                  1K74
ATOM    313  C   LEU D 237       6.694 -17.322   0.684                  1K74
ATOM    314  O   LEU D 237       7.709 -17.659   1.288                  1K74
ATOM    315  N   THR D 238       5.657 -18.152   0.546                  1K74
ATOM    316  H   THR D 238       4.850 -17.840   0.018                  1K74
ATOM    317  CA  THR D 238       5.497 -19.519   1.005                  1K74
ATOM    318  CB  THR D 238       4.069 -20.066   1.047                  1K74
ATOM    319  CG2 THR D 238       3.224 -19.339   2.091                  1K74
ATOM    320  OG1 THR D 238       3.338 -19.965  -0.172                  1K74
ATOM    321  HG1 THR D 238       2.397 -20.141  -0.117                  1K74
ATOM    322  C   THR D 238       6.294 -20.421   0.069                  1K74
ATOM    323  O   THR D 238       6.367 -21.598   0.420                  1K74
ATOM    324  N   GLY D 239       6.930 -20.194  -1.083                  1K74
ATOM    325  H   GLY D 239       6.802 -19.220  -1.333                  1K74
ATOM    326  CA  GLY D 239       7.617 -20.667  -2.267                  1K74
ATOM    327  C   GLY D 239       6.831 -21.892  -2.715                  1K74
ATOM    328  O   GLY D 239       7.313 -23.023  -2.698                  1K74
ATOM    329  N   LYS D 240       5.570 -21.743  -3.127                  1K74
ATOM    330  H   LYS D 240       5.227 -20.792  -3.034                  1K74
ATOM    331  CA  LYS D 240       4.649 -22.676  -3.749                  1K74
ATOM    332  CB  LYS D 240       3.606 -22.662  -2.632                  1K74
ATOM    333  CG  LYS D 240       3.629 -23.337  -1.264                  1K74
ATOM    334  CD  LYS D 240       4.521 -24.568  -1.135                  1K74
ATOM    335  CE  LYS D 240       5.399 -24.638   0.110                  1K74
ATOM    336  NZ  LYS D 240       6.426 -25.684  -0.018                  1K74
ATOM    337  HZ1 LYS D 240       7.159 -25.371  -0.638                  1K74
ATOM    338  HZ2 LYS D 240       6.808 -25.739   0.915                  1K74
ATOM    339  HZ3 LYS D 240       6.010 -26.559  -0.302                  1K74
ATOM    340  C   LYS D 240       4.112 -22.258  -5.113                  1K74
ATOM    341  O   LYS D 240       2.977 -22.283  -5.587                  1K74
ATOM    342  N   THR D 241       5.080 -21.791  -5.909                  1K74
ATOM    343  H   THR D 241       6.014 -21.662  -5.536                  1K74
ATOM    344  CA  THR D 241       5.030 -21.229  -7.248                  1K74
ATOM    345  CB  THR D 241       4.620 -19.760  -7.111                  1K74
ATOM    346  CG2 THR D 241       5.336 -18.519  -6.584                  1K74
ATOM    347  OG1 THR D 241       4.275 -19.196  -8.374                  1K74
ATOM    348  HG1 THR D 241       4.521 -18.327  -8.676                  1K74
ATOM    349  C   THR D 241       6.441 -21.427  -7.791                  1K74
ATOM    350  O   THR D 241       7.525 -20.917  -7.518                  1K74
ATOM    351  N   THR D 242       6.512 -22.385  -8.721                  1K74
ATOM    352  H   THR D 242       5.678 -22.950  -8.818                  1K74
ATOM    353  CA  THR D 242       7.619 -22.703  -9.604                  1K74
ATOM    354  CB  THR D 242       7.357 -24.100 -10.165                  1K74
ATOM    355  CG2 THR D 242       6.424 -24.931 -11.038                  1K74
ATOM    356  OG1 THR D 242       8.497 -24.474 -10.933                  1K74
ATOM    357  HG1 THR D 242       8.750 -25.216 -11.480                  1K74
ATOM    358  C   THR D 242       7.732 -21.677 -10.729                  1K74
ATOM    359  O   THR D 242       6.814 -21.629 -11.547                  1K74
ATOM    360  N   ASP D 243       8.848 -20.942 -10.665                  1K74
ATOM    361  H   ASP D 243       9.402 -21.026  -9.821                  1K74
ATOM    362  CA  ASP D 243       9.174 -19.865 -11.586                  1K74
ATOM    363  CB  ASP D 243       8.157 -18.836 -12.096                  1K74
ATOM    364  CG  ASP D 243       7.278 -18.199 -11.026                  1K74
ATOM    365  OD1 ASP D 243       6.880 -18.500  -9.879                  1K74
ATOM    366  OD2 ASP D 243       7.011 -17.152 -11.650                  1K74
ATOM    367  C   ASP D 243      10.257 -18.963 -10.997                  1K74
ATOM    368  O   ASP D 243      10.403 -17.742 -10.958                  1K74
ATOM    369  N   LYS D 244      11.374 -19.378 -10.384                  1K74
ATOM    370  H   LYS D 244      11.444 -20.386 -10.449                  1K74
ATOM    371  CA  LYS D 244      12.497 -18.910  -9.593                  1K74
ATOM    372  CB  LYS D 244      13.350 -17.992 -10.466                  1K74
ATOM    373  CG  LYS D 244      14.503 -17.033 -10.216                  1K74
ATOM    374  CD  LYS D 244      15.542 -18.151 -10.178                  1K74
ATOM    375  CE  LYS D 244      16.900 -17.457 -10.119                  1K74
ATOM    376  NZ  LYS D 244      17.214 -16.563  -8.993                  1K74
ATOM    377  HZ1 LYS D 244      17.148 -17.142  -8.169                  1K74
ATOM    378  HZ2 LYS D 244      18.153 -16.277  -9.222                  1K74
ATOM    379  HZ3 LYS D 244      16.501 -15.848  -8.983                  1K74
ATOM    380  C   LYS D 244      12.036 -18.139  -8.361                  1K74
ATOM    381  O   LYS D 244      11.239 -17.227  -8.147                  1K74
ATOM    382  N   SER D 245      12.650 -18.533  -7.241                  1K74
ATOM    383  H   SER D 245      13.368 -19.227  -7.400                  1K74
ATOM    384  CA  SER D 245      12.545 -17.946  -5.917                  1K74
ATOM    385  CB  SER D 245      13.117 -18.979  -4.951                  1K74
ATOM    386  OG  SER D 245      13.265 -18.691  -3.566                  1K74
ATOM    387  HG  SER D 245      13.709 -19.231  -2.912                  1K74
ATOM    388  C   SER D 245      13.322 -16.631  -5.854                  1K74
ATOM    389  O   SER D 245      14.362 -16.438  -6.487                  1K74
ATOM    390  N   PRO D 246      12.736 -15.733  -5.052                  1K74
ATOM    391  CA  PRO D 246      13.299 -14.440  -4.704                  1K74
ATOM    392  CD  PRO D 246      11.586 -15.612  -4.174                  1K74
ATOM    393  CG  PRO D 246      11.462 -14.719  -2.944                  1K74
ATOM    394  CB  PRO D 246      12.238 -13.760  -3.842                  1K74
ATOM    395  C   PRO D 246      14.619 -14.451  -3.938                  1K74
ATOM    396  O   PRO D 246      14.818 -15.269  -3.040                  1K74
ATOM    397  N   PHE D 247      15.557 -13.563  -4.276                  1K74
ATOM    398  H   PHE D 247      15.276 -12.937  -5.018                  1K74
ATOM    399  CA  PHE D 247      16.802 -13.352  -3.561                  1K74
ATOM    400  CB  PHE D 247      17.846 -12.643  -4.422                  1K74
ATOM    401  CG  PHE D 247      19.283 -12.534  -3.971                  1K74
ATOM    402  CD1 PHE D 247      20.082 -13.686  -3.860                  1K74
ATOM    403  CE1 PHE D 247      21.308 -13.608  -3.177                  1K74
ATOM    404  CZ  PHE D 247      21.685 -12.430  -2.508                  1K74
ATOM    405  CE2 PHE D 247      20.777 -11.358  -2.459                  1K74
ATOM    406  CD2 PHE D 247      19.598 -11.385  -3.224                  1K74
ATOM    407  C   PHE D 247      16.578 -12.508  -2.311                  1K74
ATOM    408  O   PHE D 247      15.940 -11.457  -2.353                  1K74
ATOM    409  N   VAL D 248      17.206 -13.164  -1.331                  1K74
ATOM    410  H   VAL D 248      17.745 -14.021  -1.341                  1K74
ATOM    411  CA  VAL D 248      17.077 -12.657   0.024                  1K74
ATOM    412  CB  VAL D 248      17.084 -13.480   1.310                  1K74
ATOM    413  CG1 VAL D 248      17.031 -13.481   2.834                  1K74
ATOM    414  CG2 VAL D 248      15.899 -14.442   1.306                  1K74
ATOM    415  C   VAL D 248      18.223 -11.687   0.280                  1K74
ATOM    416  O   VAL D 248      19.429 -11.886   0.412                  1K74
ATOM    417  N   ILE D 249      17.960 -10.384   0.390                  1K74
ATOM    418  H   ILE D 249      16.976 -10.159   0.296                  1K74
ATOM    419  CA  ILE D 249      18.703  -9.191   0.749                  1K74
ATOM    420  CB  ILE D 249      18.532  -7.865   0.010                  1K74
ATOM    421  CG2 ILE D 249      19.357  -6.651   0.432                  1K74
ATOM    422  CG1 ILE D 249      18.853  -7.937  -1.483                  1K74
ATOM    423  CD  ILE D 249      18.318  -7.311  -2.764                  1K74
ATOM    424  C   ILE D 249      18.270  -8.998   2.199                  1K74
ATOM    425  O   ILE D 249      17.168  -8.680   2.641                  1K74
ATOM    426  N   TYR D 250      19.264  -9.186   3.072                  1K74
ATOM    427  H   TYR D 250      20.212  -9.376   2.759                  1K74
ATOM    428  CA  TYR D 250      19.316  -8.798   4.466                  1K74
ATOM    429  CB  TYR D 250      19.362 -10.230   4.985                  1K74
ATOM    430  CG  TYR D 250      20.040 -11.212   5.904                  1K74
ATOM    431  CD1 TYR D 250      20.324 -10.863   7.236                  1K74
ATOM    432  CE1 TYR D 250      21.633 -10.806   7.742                  1K74
ATOM    433  CZ  TYR D 250      22.682 -11.312   6.953                  1K74
ATOM    434  OH  TYR D 250      23.863 -11.735   7.491                  1K74
ATOM    435  HH  TYR D 250      23.793 -11.550   8.431                  1K74
ATOM    436  CE2 TYR D 250      22.459 -11.553   5.586                  1K74
ATOM    437  CD2 TYR D 250      21.137 -11.596   5.112                  1K74
ATOM    438  C   TYR D 250      20.299  -7.974   5.283                  1K74
ATOM    439  O   TYR D 250      20.173  -7.623   6.454                  1K74
ATOM    440  N   ASP D 251      21.413  -7.628   4.633                  1K74
ATOM    441  H   ASP D 251      21.578  -7.945   3.682                  1K74
ATOM    442  CA  ASP D 251      22.544  -6.841   5.090                  1K74
ATOM    443  CB  ASP D 251      23.326  -7.780   6.006                  1K74
ATOM    444  CG  ASP D 251      24.489  -8.688   5.647                  1K74
ATOM    445  OD1 ASP D 251      24.968  -9.299   4.671                  1K74
ATOM    446  OD2 ASP D 251      25.376  -9.045   6.451                  1K74
ATOM    447  C   ASP D 251      23.361  -6.385   3.885                  1K74
ATOM    448  O   ASP D 251      23.168  -6.774   2.733                  1K74
ATOM    449  N   MET D 252      24.321  -5.496   4.158                  1K74
ATOM    450  H   MET D 252      24.316  -5.282   5.148                  1K74
ATOM    451  CA  MET D 252      25.285  -4.908   3.247                  1K74
ATOM    452  CB  MET D 252      26.318  -4.212   4.129                  1K74
ATOM    453  CG  MET D 252      26.451  -2.779   3.623                  1K74
ATOM    454  SD  MET D 252      24.962  -1.753   3.710                  1K74
ATOM    455  CE  MET D 252      25.150  -1.334   1.958                  1K74
ATOM    456  LP1 MET D 252      24.988  -1.731   4.387                  1K74
ATOM    457  LP2 MET D 252      24.790  -1.955   3.084                  1K74
ATOM    458  C   MET D 252      25.995  -5.902   2.335                  1K74
ATOM    459  O   MET D 252      25.739  -5.536   1.189                  1K74
ATOM    460  N   ASN D 253      26.692  -6.931   2.822                  1K74
ATOM    461  H   ASN D 253      26.545  -7.078   3.812                  1K74
ATOM    462  CA  ASN D 253      27.247  -7.942   1.944                  1K74
ATOM    463  CB  ASN D 253      27.911  -8.851   2.975                  1K74
ATOM    464  CG  ASN D 253      28.984  -9.644   2.247                  1K74
ATOM    465  OD1 ASN D 253      28.673 -10.790   2.557                  1K74
ATOM    466  ND2 ASN D 253      30.025  -9.364   1.461                  1K74
ATOM    467  HD21ASN D 253      30.227  -8.382   1.565                  1K74
ATOM    468  HD22ASN D 253      30.481 -10.061   0.891                  1K74
ATOM    469  C   ASN D 253      26.293  -8.738   1.063                  1K74
ATOM    470  O   ASN D 253      26.769  -8.940  -0.052                  1K74
ATOM    471  N   SER D 254      25.090  -9.140   1.482                  1K74
ATOM    472  H   SER D 254      24.798  -8.782   2.384                  1K74
ATOM    473  CA  SER D 254      24.048  -9.885   0.801                  1K74
ATOM    474  CB  SER D 254      22.846 -10.517   1.504                  1K74
ATOM    475  OG  SER D 254      21.992  -9.736   2.335                  1K74
ATOM    476  HG  SER D 254      22.111 -10.069   3.213                  1K74
ATOM    477  C   SER D 254      23.446  -8.892  -0.185                  1K74
ATOM    478  O   SER D 254      23.273  -9.485  -1.248                  1K74
ATOM    479  N   LEU D 255      23.129  -7.600  -0.059                  1K74
ATOM    480  H   LEU D 255      23.344  -7.341   0.898                  1K74
ATOM    481  CA  LEU D 255      22.713  -6.562  -0.982                  1K74
ATOM    482  CB  LEU D 255      22.492  -5.209  -0.307                  1K74
ATOM    483  CG  LEU D 255      21.925  -4.156  -1.258                  1K74
ATOM    484  CD1 LEU D 255      20.704  -4.067  -2.166                  1K74
ATOM    485  CD2 LEU D 255      21.640  -2.892  -0.460                  1K74
ATOM    486  C   LEU D 255      23.769  -6.369  -2.066                  1K74
ATOM    487  O   LEU D 255      23.145  -6.286  -3.123                  1K74
ATOM    488  N   MET D 256      25.078  -6.326  -1.796                  1K74
ATOM    489  H   MET D 256      25.201  -6.404  -0.795                  1K74
ATOM    490  CA  MET D 256      26.100  -6.229  -2.823                  1K74
ATOM    491  CB  MET D 256      27.335  -6.248  -1.924                  1K74
ATOM    492  CG  MET D 256      27.741  -4.844  -1.486                  1K74
ATOM    493  SD  MET D 256      27.456  -3.270  -2.336                  1K74
ATOM    494  CE  MET D 256      28.782  -3.471  -3.547                  1K74
ATOM    495  LP1 MET D 256      26.794  -3.413  -2.271                  1K74
ATOM    496  LP2 MET D 256      28.023  -3.472  -2.644                  1K74
ATOM    497  C   MET D 256      26.034  -7.384  -3.818                  1K74
ATOM    498  O   MET D 256      26.140  -7.005  -4.982                  1K74
ATOM    499  N   MET D 257      25.855  -8.609  -3.316                  1K74
ATOM    500  H   MET D 257      25.702  -8.693  -2.319                  1K74
ATOM    501  CA  MET D 257      25.564  -9.811  -4.072                  1K74
ATOM    502  CB  MET D 257      25.547 -11.028  -3.154                  1K74
ATOM    503  CG  MET D 257      26.888 -11.353  -2.503                  1K74
ATOM    504  SD  MET D 257      26.169 -12.735  -1.586                  1K74
ATOM    505  CE  MET D 257      27.668 -12.682  -0.576                  1K74
ATOM    506  LP1 MET D 257      26.578 -13.192  -1.889                  1K74
ATOM    507  LP2 MET D 257      26.134 -12.388  -1.009                  1K74
ATOM    508  C   MET D 257      24.222  -9.792  -4.790                  1K74
ATOM    509  O   MET D 257      24.147 -10.282  -5.914                  1K74
ATOM    510  N   GLY D 258      23.135  -9.235  -4.251                  1K74
ATOM    511  H   GLY D 258      23.352  -8.636  -3.465                  1K74
ATOM    512  CA  GLY D 258      21.732  -8.951  -4.483                  1K74
ATOM    513  C   GLY D 258      21.763  -8.190  -5.800                  1K74
ATOM    514  O   GLY D 258      20.759  -8.488  -5.154                  1K74
ATOM    515  N   GLU D 259      22.434  -7.649  -6.818                  1K74
ATOM    516  H   GLU D 259      23.339  -7.885  -6.432                  1K74
ATOM    517  CA  GLU D 259      22.034  -7.014  -8.057                  1K74
ATOM    518  CB  GLU D 259      23.385  -7.372  -8.669                  1K74
ATOM    519  CG  GLU D 259      23.961  -7.616 -10.041                  1K74
ATOM    520  CD  GLU D 259      25.198  -6.979 -10.662                  1K74
ATOM    521  OE1 GLU D 259      24.967  -8.010 -11.322                  1K74
ATOM    522  OE2 GLU D 259      26.089  -6.655 -11.471                  1K74
ATOM    523  C   GLU D 259      20.829  -7.504  -8.846                  1K74
ATOM    524  O   GLU D 259      20.355  -8.087  -9.819                  1K74
ATOM    525  N   ASP D 260      19.650  -7.198  -8.301                  1K74
ATOM    526  H   ASP D 260      19.853  -6.778  -7.398                  1K74
ATOM    527  CA  ASP D 260      18.204  -7.126  -8.400                  1K74
ATOM    528  CB  ASP D 260      17.749  -7.955  -7.205                  1K74
ATOM    529  CG  ASP D 260      16.296  -8.220  -7.629                  1K74
ATOM    530  OD1 ASP D 260      15.884  -9.381  -7.590                  1K74
ATOM    531  OD2 ASP D 260      15.170  -8.453  -8.055                  1K74
ATOM    532  C   ASP D 260      17.604  -5.731  -8.318                  1K74
ATOM    533  O   ASP D 260      16.489  -5.371  -8.671                  1K74
ATOM    534  N   LYS D 261      18.151  -4.614  -7.835                  1K74
ATOM    535  H   LYS D 261      19.047  -5.072  -7.869                  1K74
ATOM    536  CA  LYS D 261      17.799  -3.245  -7.490                  1K74
ATOM    537  CB  LYS D 261      17.624  -3.551  -6.006                  1K74
ATOM    538  CG  LYS D 261      16.690  -2.459  -5.530                  1K74
ATOM    539  CD  LYS D 261      17.362  -1.978  -4.246                  1K74
ATOM    540  CE  LYS D 261      16.387  -1.247  -3.330                  1K74
ATOM    541  NZ  LYS D 261      17.157  -0.073  -2.927                  1K74
ATOM    542  HZ1 LYS D 261      17.962   0.119  -2.350                  1K74
ATOM    543  HZ2 LYS D 261      16.771   0.860  -2.833                  1K74
ATOM    544  HZ3 LYS D 261      16.297  -0.277  -2.455                  1K74
ATOM    545  C   LYS D 261      19.166  -2.833  -7.989                  1K74
ATOM    546  O   LYS D 261      20.121  -2.787  -7.220                  1K74
ATOM    547  N   ILE D 262      19.801  -2.452  -9.087                  1K74
ATOM    548  H   ILE D 262      19.012  -2.540  -9.705                  1K74
ATOM    549  CA  ILE D 262      20.635  -1.737 -10.038                  1K74
ATOM    550  CB  ILE D 262      21.754  -1.471  -9.024                  1K74
ATOM    551  CG2 ILE D 262      23.122  -1.455  -8.335                  1K74
ATOM    552  CG1 ILE D 262      22.010   0.105  -9.132                  1K74
ATOM    553  CD  ILE D 262      20.827   0.511  -8.259                  1K74
ATOM    554  C   ILE D 262      21.341  -2.004 -11.381                  1K74
ATOM    555  O   ILE D 262      21.618  -1.107 -12.178                  1K74
ATOM    556  N   LYS D 263      21.347  -3.335 -11.584                  1K74
ATOM    557  H   LYS D 263      20.497  -3.765 -11.243                  1K74
ATOM    558  CA  LYS D 263      22.392  -3.806 -12.455                  1K74
ATOM    559  CB  LYS D 263      23.318  -4.216 -11.331                  1K74
ATOM    560  CG  LYS D 263      24.174  -4.108 -10.090                  1K74
ATOM    561  CD  LYS D 263      25.532  -3.528  -9.775                  1K74
ATOM    562  CE  LYS D 263      26.234  -2.377  -9.072                  1K74
ATOM    563  NZ  LYS D 263      25.930  -1.136  -9.804                  1K74
ATOM    564  HZ1 LYS D 263      24.945  -0.978  -9.977                  1K74
ATOM    565  HZ2 LYS D 263      26.151  -0.421  -9.129                  1K74
ATOM    566  HZ3 LYS D 263      26.261  -1.153 -10.757                  1K74
ATOM    567  C   LYS D 263      22.217  -4.939 -13.444                  1K74
ATOM    568  O   LYS D 263      21.537  -4.305 -14.245                  1K74
ATOM    569  N   PHE D 264      22.639  -6.209 -13.473                  1K74
ATOM    570  H   PHE D 264      23.154  -6.347 -12.608                  1K74
ATOM    571  CA  PHE D 264      22.574  -7.408 -14.295                  1K74
ATOM    572  CB  PHE D 264      22.634  -8.859 -13.805                  1K74
ATOM    573  CG  PHE D 264      23.433  -9.851 -14.621                  1K74
ATOM    574  CD1 PHE D 264      24.224  -9.613 -15.759                  1K74
ATOM    575  CE1 PHE D 264      24.078 -10.545 -16.801                  1K74
ATOM    576  CZ  PHE D 264      23.280 -11.702 -16.786                  1K74
ATOM    577  CE2 PHE D 264      22.481 -11.772 -15.631                  1K74
ATOM    578  CD2 PHE D 264      22.443 -10.848 -14.571                  1K74
ATOM    579  C   PHE D 264      21.287  -7.505 -15.112                  1K74
ATOM    580  O   PHE D 264      21.543  -7.778 -16.285                  1K74
ATOM    581  N   LYS D 265      20.138  -7.272 -14.465                  1K74
ATOM    582  H   LYS D 265      20.258  -6.920 -13.521                  1K74
ATOM    583  CA  LYS D 265      18.878  -7.470 -15.157                  1K74
ATOM    584  CB  LYS D 265      18.110  -7.665 -13.854                  1K74
ATOM    585  CG  LYS D 265      18.010  -8.648 -12.692                  1K74
ATOM    586  CD  LYS D 265      16.750  -8.323 -11.896                  1K74
ATOM    587  CE  LYS D 265      17.146  -9.424 -10.916                  1K74
ATOM    588  NZ  LYS D 265      15.865  -9.962 -10.431                  1K74
ATOM    589  HZ1 LYS D 265      14.982 -10.079 -10.903                  1K74
ATOM    590  HZ2 LYS D 265      15.895 -10.181  -9.441                  1K74
ATOM    591  HZ3 LYS D 265      15.541  -9.183  -9.861                  1K74
ATOM    592  C   LYS D 265      18.655  -6.181 -15.937                  1K74
ATOM    593  O   LYS D 265      19.399  -5.591 -16.719                  1K74
ATOM    594  N   HIS D 266      17.672  -5.289 -16.063                  1K74
ATOM    595  H   HIS D 266      17.023  -5.593 -15.347                  1K74
ATOM    596  CA  HIS D 266      17.217  -4.102 -16.772                  1K74
ATOM    597  CB  HIS D 266      15.859  -4.372 -17.413                  1K74
ATOM    598  CG  HIS D 266      15.820  -5.525 -18.381                  1K74
ATOM    599  ND1 HIS D 266      16.778  -5.722 -19.361                  1K74
ATOM    600  HD1 HIS D 266      17.505  -5.096 -19.676                  1K74
ATOM    601  CE1 HIS D 266      16.546  -6.883 -19.994                  1K74
ATOM    602  NE2 HIS D 266      15.528  -7.420 -19.319                  1K74
ATOM    603  CD2 HIS D 266      15.134  -6.701 -18.192                  1K74
ATOM    604  C   HIS D 266      17.216  -3.138 -15.594                  1K74
ATOM    605  O   HIS D 266      16.435  -3.301 -14.657                  1K74
ATOM    606  N   ILE D 267      18.141  -2.183 -15.747                  1K74
ATOM    607  H   ILE D 267      18.843  -2.261 -16.473                  1K74
ATOM    608  CA  ILE D 267      18.434  -1.009 -14.943                  1K74
ATOM    609  CB  ILE D 267      19.588  -0.069 -15.299                  1K74
ATOM    610  CG2 ILE D 267      20.091   1.034 -14.370                  1K74
ATOM    611  CG1 ILE D 267      21.000  -0.565 -15.599                  1K74
ATOM    612  CD  ILE D 267      21.369  -0.666 -17.076                  1K74
ATOM    613  C   ILE D 267      17.150  -0.182 -14.989                  1K74
ATOM    614  O   ILE D 267      16.690   0.704 -15.707                  1K74
ATOM    615  N   THR D 268      16.188  -0.379 -14.080                  1K74
ATOM    616  H   THR D 268      16.491  -1.148 -13.496                  1K74
ATOM    617  CA  THR D 268      14.890   0.107 -13.642                  1K74
ATOM    618  CB  THR D 268      13.726  -0.843 -13.937                  1K74
ATOM    619  CG2 THR D 268      12.237  -0.520 -13.808                  1K74
ATOM    620  OG1 THR D 268      13.700  -1.321 -15.281                  1K74
ATOM    621  HG1 THR D 268      13.095  -2.056 -15.396                  1K74
ATOM    622  C   THR D 268      14.891   0.344 -12.139                  1K74
ATOM    623  O   THR D 268      14.570   1.522 -12.269                  1K74
ATOM    624  N   PRO D 269      15.148  -0.478 -11.117                  1K74
ATOM    625  CA  PRO D 269      15.274   0.073  -9.788                  1K74
ATOM    626  CD  PRO D 269      14.982  -1.911 -11.016                  1K74
ATOM    627  CG  PRO D 269      16.105  -1.905  -9.985                  1K74
ATOM    628  CB  PRO D 269      15.694  -1.016  -8.816                  1K74
ATOM    629  C   PRO D 269      16.284   1.183  -9.544                  1K74
ATOM    630  O   PRO D 269      17.493   1.291  -9.724                  1K74
ATOM    631  N   LEU D 270      15.733   2.282  -9.018                  1K74
ATOM    632  H   LEU D 270      14.830   2.108  -8.587                  1K74
ATOM    633  CA  LEU D 270      16.189   3.664  -8.962                  1K74
ATOM    634  CB  LEU D 270      14.982   4.590  -9.193                  1K74
ATOM    635  CG  LEU D 270      13.508   4.556  -8.789                  1K74
ATOM    636  CD1 LEU D 270      12.994   3.596  -7.717                  1K74
ATOM    637  CD2 LEU D 270      13.695   6.025  -8.414                  1K74
ATOM    638  C   LEU D 270      16.849   4.417  -7.845                  1K74
ATOM    639  O   LEU D 270      16.271   4.252  -6.791                  1K74
ATOM    640  N   GLN D 271      17.888   5.107  -8.229                  1K74
ATOM    641  H   GLN D 271      18.367   4.413  -8.788                  1K74
ATOM    642  CA  GLN D 271      19.316   4.995  -8.149                  1K74
ATOM    643  CB  GLN D 271      19.698   5.929  -7.006                  1K74
ATOM    644  CG  GLN D 271      20.638   6.290  -5.816                  1K74
ATOM    645  CD  GLN D 271      20.613   6.099  -4.282                  1K74
ATOM    646  OE1 GLN D 271      19.465   6.526  -4.114                  1K74
ATOM    647  NE2 GLN D 271      21.258   5.691  -3.178                  1K74
ATOM    648  HE21GLN D 271      22.103   6.196  -3.415                  1K74
ATOM    649  HE22GLN D 271      21.293   6.275  -2.343                  1K74
ATOM    650  C   GLN D 271      20.471   4.041  -7.953                  1K74
ATOM    651  O   GLN D 271      19.697   3.156  -8.224                  1K74
ATOM    652  N   GLU D 272      21.732   3.790  -7.696                  1K74
ATOM    653  H   GLU D 272      22.140   4.441  -7.091                  1K74
ATOM    654  CA  GLU D 272      22.868   2.963  -7.629                  1K74
ATOM    655  CB  GLU D 272      23.138   3.595  -8.992                  1K74
ATOM    656  CG  GLU D 272      22.600   3.566 -10.423                  1K74
ATOM    657  CD  GLU D 272      22.713   3.167 -11.876                  1K74
ATOM    658  OE1 GLU D 272      23.349   2.133 -11.922                  1K74
ATOM    659  OE2 GLU D 272      22.991   2.424 -12.836                  1K74
ATOM    660  C   GLU D 272      24.091   2.710  -6.788                  1K74
ATOM    661  O   GLU D 272      25.288   2.609  -7.002                  1K74
ATOM    662  N   GLN D 273      23.975   2.592  -5.460                  1K74
ATOM    663  H   GLN D 273      23.227   2.382  -4.812                  1K74
ATOM    664  CA  GLN D 273      24.604   2.984  -4.210                  1K74
ATOM    665  CB  GLN D 273      25.723   2.131  -3.643                  1K74
ATOM    666  CG  GLN D 273      27.182   2.191  -3.210                  1K74
ATOM    667  CD  GLN D 273      28.215   1.237  -3.791                  1K74
ATOM    668  OE1 GLN D 273      29.061   0.887  -2.974                  1K74
ATOM    669  NE2 GLN D 273      28.456   0.663  -4.971                  1K74
ATOM    670  HE21GLN D 273      27.743   0.928  -5.636                  1K74
ATOM    671  HE22GLN D 273      29.183   0.001  -5.192                  1K74
ATOM    672  C   GLN D 273      25.153   4.381  -4.486                  1K74
ATOM    673  O   GLN D 273      24.236   4.935  -3.891                  1K74
ATOM    674  N   SER D 274      26.142   5.049  -5.083                  1K74
ATOM    675  H   SER D 274      26.587   4.358  -5.671                  1K74
ATOM    676  CA  SER D 274      26.427   6.257  -5.835                  1K74
ATOM    677  CB  SER D 274      25.416   6.588  -6.931                  1K74
ATOM    678  OG  SER D 274      26.100   7.176  -8.034                  1K74
ATOM    679  HG  SER D 274      25.451   7.424  -8.696                  1K74
ATOM    680  C   SER D 274      26.416   7.354  -4.779                  1K74
ATOM    681  O   SER D 274      27.280   8.214  -4.617                  1K74
ATOM    682  N   LYS D 275      25.455   7.536  -3.864                  1K74
ATOM    683  H   LYS D 275      24.691   6.881  -4.026                  1K74
ATOM    684  CA  LYS D 275      25.188   8.156  -2.579                  1K74
ATOM    685  CB  LYS D 275      24.599   9.258  -3.451                  1K74
ATOM    686  CG  LYS D 275      24.747  10.558  -4.226                  1K74
ATOM    687  CD  LYS D 275      23.820  11.736  -3.956                  1K74
ATOM    688  CE  LYS D 275      22.299  11.788  -4.049                  1K74
ATOM    689  NZ  LYS D 275      21.882  11.318  -2.718                  1K74
ATOM    690  HZ1 LYS D 275      22.133  11.748  -1.838                  1K74
ATOM    691  HZ2 LYS D 275      20.901  11.076  -2.757                  1K74
ATOM    692  HZ3 LYS D 275      22.201  10.381  -2.511                  1K74
ATOM    693  C   LYS D 275      24.275   7.379  -1.644                  1K74
ATOM    694  O   LYS D 275      23.138   7.739  -1.357                  1K74
ATOM    695  N   GLU D 276      24.929   6.287  -1.246                  1K74
ATOM    696  H   GLU D 276      25.691   5.857  -1.746                  1K74
ATOM    697  CA  GLU D 276      24.688   5.366  -0.159                  1K74
ATOM    698  CB  GLU D 276      24.409   6.003   1.196                  1K74
ATOM    699  CG  GLU D 276      25.222   5.798   2.463                  1K74
ATOM    700  CD  GLU D 276      24.263   5.743   3.643                  1K74
ATOM    701  OE1 GLU D 276      24.863   6.354   4.554                  1K74
ATOM    702  OE2 GLU D 276      23.137   5.207   3.713                  1K74
ATOM    703  C   GLU D 276      23.590   4.331   0.007                  1K74
ATOM    704  O   GLU D 276      22.591   4.773  -0.553                  1K74
ATOM    705  N   VAL D 277      23.041   3.188   0.402                  1K74
ATOM    706  H   VAL D 277      23.925   3.166   0.885                  1K74
ATOM    707  CA  VAL D 277      22.007   2.178   0.523                  1K74
ATOM    708  CB  VAL D 277      22.523   1.136   1.510                  1K74
ATOM    709  CG1 VAL D 277      22.773   1.137   3.014                  1K74
ATOM    710  CG2 VAL D 277      21.689  -0.135   1.600                  1K74
ATOM    711  C   VAL D 277      20.763   2.886   1.045                  1K74
ATOM    712  O   VAL D 277      19.750   2.400   0.546                  1K74
ATOM    713  N   ALA D 278      20.674   3.884   1.927                  1K74
ATOM    714  H   ALA D 278      21.642   4.123   2.101                  1K74
ATOM    715  CA  ALA D 278      19.508   4.527   2.500                  1K74
ATOM    716  CB  ALA D 278      19.907   5.421   3.668                  1K74
ATOM    717  C   ALA D 278      18.794   5.402   1.478                  1K74
ATOM    718  O   ALA D 278      17.657   4.956   1.643                  1K74
ATOM    719  N   ILE D 279      19.372   6.321   0.692                  1K74
ATOM    720  H   ILE D 279      20.377   6.227   0.629                  1K74
ATOM    721  CA  ILE D 279      18.622   7.121  -0.268                  1K74
ATOM    722  CB  ILE D 279      19.308   8.281  -1.002                  1K74
ATOM    723  CG2 ILE D 279      20.353   8.637  -2.055                  1K74
ATOM    724  CG1 ILE D 279      18.742   9.395  -1.888                  1K74
ATOM    725  CD  ILE D 279      17.786  10.360  -1.184                  1K74
ATOM    726  C   ILE D 279      18.195   6.054  -1.273                  1K74
ATOM    727  O   ILE D 279      17.088   6.273  -1.759                  1K74
ATOM    728  N   ARG D 280      18.773   4.931  -1.700                  1K74
ATOM    729  H   ARG D 280      19.653   4.682  -1.272                  1K74
ATOM    730  CA  ARG D 280      18.567   3.828  -2.604                  1K74
ATOM    731  CB  ARG D 280      19.621   2.757  -2.358                  1K74
ATOM    732  CG  ARG D 280      20.585   1.711  -2.891                  1K74
ATOM    733  CD  ARG D 280      20.206   2.163  -4.300                  1K74
ATOM    734  NE  ARG D 280      18.997   1.776  -5.051                  1K74
ATOM    735  HE  ARG D 280      18.085   2.016  -4.706                  1K74
ATOM    736  CZ  ARG D 280      17.943   1.301  -5.722                  1K74
ATOM    737  NH1 ARG D 280      18.739   0.237  -5.944                  1K74
ATOM    738  HH11ARG D 280      19.738   0.153  -5.880                  1K74
ATOM    739  HH12ARG D 280      18.719  -0.579  -6.532                  1K74
ATOM    740  NH2 ARG D 280      16.731   1.224  -6.293                  1K74
ATOM    741  HH21ARG D 280      16.394   2.181  -6.312                  1K74
ATOM    742  HH22ARG D 280      16.473   0.419  -6.847                  1K74
ATOM    743  C   ARG D 280      17.198   3.230  -2.352                  1K74
ATOM    744  O   ARG D 280      16.473   3.327  -3.338                  1K74
ATOM    745  N   ILE D 281      16.731   2.620  -1.265                  1K74
ATOM    746  H   ILE D 281      17.591   2.654  -0.736                  1K74
ATOM    747  CA  ILE D 281      15.455   2.150  -0.763                  1K74
ATOM    748  CB  ILE D 281      15.744   1.529   0.597                  1K74
ATOM    749  CG2 ILE D 281      14.544   0.916   1.311                  1K74
ATOM    750  CG1 ILE D 281      16.727   0.378   0.768                  1K74
ATOM    751  CD  ILE D 281      17.730  -0.210   1.745                  1K74
ATOM    752  C   ILE D 281      14.647   3.434  -0.696                  1K74
ATOM    753  O   ILE D 281      13.751   2.832  -1.284                  1K74
ATOM    754  N   PHE D 282      14.850   4.664  -0.221                  1K74
ATOM    755  H   PHE D 282      15.838   4.567  -0.028                  1K74
ATOM    756  CA  PHE D 282      13.888   5.744  -0.324                  1K74
ATOM    757  CB  PHE D 282      14.786   6.868   0.184                  1K74
ATOM    758  CG  PHE D 282      14.326   8.286  -0.040                  1K74
ATOM    759  CD1 PHE D 282      14.601   8.922  -1.264                  1K74
ATOM    760  CE1 PHE D 282      14.061  10.205  -1.459                  1K74
ATOM    761  CZ  PHE D 282      13.003  10.663  -0.656                  1K74
ATOM    762  CE2 PHE D 282      12.682   9.946   0.510                  1K74
ATOM    763  CD2 PHE D 282      13.282   8.708   0.801                  1K74
ATOM    764  C   PHE D 282      13.427   5.899  -1.767                  1K74
ATOM    765  O   PHE D 282      12.199   5.952  -1.762                  1K74
ATOM    766  N   GLN D 283      14.234   5.942  -2.832                  1K74
ATOM    767  H   GLN D 283      15.190   5.760  -2.545                  1K74
ATOM    768  CA  GLN D 283      13.847   6.190  -4.209                  1K74
ATOM    769  CB  GLN D 283      15.262   6.487  -4.692                  1K74
ATOM    770  CG  GLN D 283      15.647   7.942  -4.439                  1K74
ATOM    771  CD  GLN D 283      16.825   8.314  -5.322                  1K74
ATOM    772  OE1 GLN D 283      17.573   7.774  -6.129                  1K74
ATOM    773  NE2 GLN D 283      17.355   9.531  -5.449                  1K74
ATOM    774  HE21GLN D 283      16.652  10.155  -5.086                  1K74
ATOM    775  HE22GLN D 283      18.178   9.638  -6.024                  1K74
ATOM    776  C   GLN D 283      13.245   4.814  -4.457                  1K74
ATOM    777  O   GLN D 283      12.168   5.135  -4.956                  1K74
ATOM    778  N   GLY D 284      13.449   3.503  -4.306                  1K74
ATOM    779  H   GLY D 284      14.339   3.608  -3.846                  1K74
ATOM    780  CA  GLY D 284      12.960   2.135  -4.260                  1K74
ATOM    781  C   GLY D 284      11.442   2.235  -4.383                  1K74
ATOM    782  O   GLY D 284      10.533   2.091  -5.200                  1K74
ATOM    783  N   CYS D 285      11.054   2.660  -3.177                  1K74
ATOM    784  H   CYS D 285      11.712   3.079  -2.529                  1K74
ATOM    785  CA  CYS D 285       9.796   2.843  -2.480                  1K74
ATOM    786  CB  CYS D 285       9.836   3.145  -0.985                  1K74
ATOM    787  SG  CYS D 285      10.590   1.823  -0.008                  1K74
ATOM    788  LP1 CYS D 285      11.150   1.843  -0.384                  1K74
ATOM    789  LP2 CYS D 285      10.162   1.360  -0.256                  1K74
ATOM    790  C   CYS D 285       9.047   4.015  -3.099                  1K74
ATOM    791  O   CYS D 285       7.892   3.636  -3.283                  1K74
ATOM    792  N   GLN D 286       9.558   5.210  -3.401                  1K74
ATOM    793  H   GLN D 286      10.553   5.201  -3.213                  1K74
ATOM    794  CA  GLN D 286       8.965   6.212  -4.264                  1K74
ATOM    795  CB  GLN D 286      10.100   7.222  -4.368                  1K74
ATOM    796  CG  GLN D 286       9.491   8.597  -4.154                  1K74
ATOM    797  CD  GLN D 286      10.682   9.531  -4.069                  1K74
ATOM    798  OE1 GLN D 286      10.440  10.722  -4.252                  1K74
ATOM    799  NE2 GLN D 286      11.996   9.545  -3.847                  1K74
ATOM    800  HE21GLN D 286      12.174   8.629  -3.460                  1K74
ATOM    801  HE22GLN D 286      12.624  10.335  -3.863                  1K74
ATOM    802  C   GLN D 286       8.505   5.881  -5.677                  1K74
ATOM    803  O   GLN D 286       7.416   6.431  -5.816                  1K74
ATOM    804  N   PHE D 287       9.335   5.119  -6.398                  1K74
ATOM    805  H   PHE D 287      10.209   4.873  -5.948                  1K74
ATOM    806  CA  PHE D 287       8.769   4.563  -7.611                  1K74
ATOM    807  CB  PHE D 287       9.832   3.858  -8.445                  1K74
ATOM    808  CG  PHE D 287       9.972   2.937  -9.626                  1K74
ATOM    809  CD1 PHE D 287       9.548   1.611  -9.426                  1K74
ATOM    810  CE1 PHE D 287       8.994   0.973 -10.549                  1K74
ATOM    811  CZ  PHE D 287       8.866   1.610 -11.796                  1K74
ATOM    812  CE2 PHE D 287       9.179   2.980 -11.860                  1K74
ATOM    813  CD2 PHE D 287       9.629   3.712 -10.747                  1K74
ATOM    814  C   PHE D 287       7.668   3.532  -7.412                  1K74
ATOM    815  O   PHE D 287       6.853   3.833  -8.280                  1K74
ATOM    816  N   ARG D 288       7.764   2.617  -6.441                  1K74
ATOM    817  H   ARG D 288       8.586   2.666  -5.853                  1K74
ATOM    818  CA  ARG D 288       6.606   1.768  -6.232                  1K74
ATOM    819  CB  ARG D 288       6.986   0.809  -5.106                  1K74
ATOM    820  CG  ARG D 288       6.152  -0.391  -4.666                  1K74
ATOM    821  CD  ARG D 288       5.347  -1.147  -5.717                  1K74
ATOM    822  NE  ARG D 288       3.947  -0.837  -5.991                  1K74
ATOM    823  HE  ARG D 288       3.472  -0.641  -5.123                  1K74
ATOM    824  CZ  ARG D 288       3.249  -1.239  -7.061                  1K74
ATOM    825  NH1 ARG D 288       3.573  -1.679  -8.281                  1K74
ATOM    826  HH11ARG D 288       4.505  -1.328  -8.458                  1K74
ATOM    827  HH12ARG D 288       3.037  -1.703  -9.138                  1K74
ATOM    828  NH2 ARG D 288       1.923  -1.229  -6.884                  1K74
ATOM    829  HH21ARG D 288       1.350  -1.241  -6.055                  1K74
ATOM    830  HH22ARG D 288       1.205  -1.471  -7.568                  1K74
ATOM    831  C   ARG D 288       5.359   2.559  -5.847                  1K74
ATOM    832  O   ARG D 288       4.327   2.166  -6.387                  1K74
ATOM    833  N   SER D 289       5.394   3.614  -5.026                  1K74
ATOM    834  H   SER D 289       6.372   3.803  -4.841                  1K74
ATOM    835  CA  SER D 289       4.348   4.546  -4.649                  1K74
ATOM    836  CB  SER D 289       5.058   5.578  -3.776                  1K74
ATOM    837  OG  SER D 289       4.079   5.978  -2.822                  1K74
ATOM    838  HG  SER D 289       4.529   6.591  -2.238                  1K74
ATOM    839  C   SER D 289       3.791   5.134  -5.940                  1K74
ATOM    840  O   SER D 289       2.563   5.079  -5.925                  1K74
ATOM    841  N   VAL D 290       4.544   5.613  -6.933                  1K74
ATOM    842  H   VAL D 290       5.539   5.460  -6.817                  1K74
ATOM    843  CA  VAL D 290       4.062   6.224  -8.157                  1K74
ATOM    844  CB  VAL D 290       5.106   6.840  -9.083                  1K74
ATOM    845  CG1 VAL D 290       5.403   7.481 -10.431                  1K74
ATOM    846  CG2 VAL D 290       5.733   8.059  -8.417                  1K74
ATOM    847  C   VAL D 290       3.338   5.138  -8.944                  1K74
ATOM    848  O   VAL D 290       2.282   5.637  -9.324                  1K74
ATOM    849  N   GLU D 291       3.740   3.885  -9.167                  1K74
ATOM    850  H   GLU D 291       4.563   3.653  -8.626                  1K74
ATOM    851  CA  GLU D 291       3.058   2.850  -9.920                  1K74
ATOM    852  CB  GLU D 291       3.904   1.586  -9.997                  1K74
ATOM    853  CG  GLU D 291       5.013   1.827 -11.018                  1K74
ATOM    854  CD  GLU D 291       5.469   0.462 -11.514                  1K74
ATOM    855  OE1 GLU D 291       5.741  -0.517 -10.784                  1K74
ATOM    856  OE2 GLU D 291       5.490   0.587 -12.756                  1K74
ATOM    857  C   GLU D 291       1.746   2.551  -9.205                  1K74
ATOM    858  O   GLU D 291       0.851   2.569 -10.047                  1K74
ATOM    859  N   ALA D 292       1.597   2.349  -7.893                  1K74
ATOM    860  H   ALA D 292       2.440   2.647  -7.417                  1K74
ATOM    861  CA  ALA D 292       0.427   2.095  -7.076                  1K74
ATOM    862  CB  ALA D 292       0.765   1.980  -5.592                  1K74
ATOM    863  C   ALA D 292      -0.478   3.294  -7.325                  1K74
ATOM    864  O   ALA D 292      -1.529   2.707  -7.571                  1K74
ATOM    865  N   VAL D 293      -0.244   4.609  -7.308                  1K74
ATOM    866  H   VAL D 293       0.736   4.784  -7.124                  1K74
ATOM    867  CA  VAL D 293      -1.042   5.806  -7.493                  1K74
ATOM    868  CB  VAL D 293      -0.455   7.215  -7.528                  1K74
ATOM    869  CG1 VAL D 293      -0.987   8.639  -7.625                  1K74
ATOM    870  CG2 VAL D 293       0.355   7.546  -6.282                  1K74
ATOM    871  C   VAL D 293      -1.717   5.600  -8.842                  1K74
ATOM    872  O   VAL D 293      -2.922   5.706  -8.623                  1K74
ATOM    873  N   GLN D 294      -1.084   5.337  -9.988                  1K74
ATOM    874  H   GLN D 294      -0.111   5.142  -9.789                  1K74
ATOM    875  CA  GLN D 294      -1.649   5.171 -11.314                  1K74
ATOM    876  CB  GLN D 294      -0.480   4.901 -12.257                  1K74
ATOM    877  CG  GLN D 294       0.486   6.071 -12.424                  1K74
ATOM    878  CD  GLN D 294       1.763   5.642 -13.126                  1K74
ATOM    879  OE1 GLN D 294       1.569   5.729 -14.337                  1K74
ATOM    880  NE2 GLN D 294       2.896   5.257 -12.539                  1K74
ATOM    881  HE21GLN D 294       2.898   5.199 -11.531                  1K74
ATOM    882  HE22GLN D 294       3.676   5.057 -13.147                  1K74
ATOM    883  C   GLN D 294      -2.630   4.004 -11.306                  1K74
ATOM    884  O   GLN D 294      -3.689   4.298 -11.856                  1K74
ATOM    885  N   GLU D 295      -2.335   2.834 -10.732                  1K74
ATOM    886  H   GLU D 295      -1.456   2.827 -10.230                  1K74
ATOM    887  CA  GLU D 295      -3.129   1.628 -10.603                  1K74
ATOM    888  CB  GLU D 295      -2.402   0.444  -9.978                  1K74
ATOM    889  CG  GLU D 295      -1.274  -0.087 -10.853                  1K74
ATOM    890  CD  GLU D 295      -0.281  -0.817  -9.960                  1K74
ATOM    891  OE1 GLU D 295       0.027  -1.151  -8.800                  1K74
ATOM    892  OE2 GLU D 295       0.764  -1.423 -10.267                  1K74
ATOM    893  C   GLU D 295      -4.354   1.856  -9.728                  1K74
ATOM    894  O   GLU D 295      -5.384   1.387 -10.207                  1K74
ATOM    895  N   ILE D 296      -4.371   2.505  -8.560                  1K74
ATOM    896  H   ILE D 296      -3.416   2.771  -8.345                  1K74
ATOM    897  CA  ILE D 296      -5.321   2.971  -7.570                  1K74
ATOM    898  CB  ILE D 296      -4.943   3.643  -6.253                  1K74
ATOM    899  CG2 ILE D 296      -5.925   4.117  -5.184                  1K74
ATOM    900  CG1 ILE D 296      -4.058   2.856  -5.291                  1K74
ATOM    901  CD  ILE D 296      -2.820   3.198  -4.472                  1K74
ATOM    902  C   ILE D 296      -6.122   3.978  -8.385                  1K74
ATOM    903  O   ILE D 296      -7.293   3.623  -8.268                  1K74
ATOM    904  N   THR D 297      -5.786   5.033  -9.128                  1K74
ATOM    905  H   THR D 297      -4.772   5.020  -9.115                  1K74
ATOM    906  CA  THR D 297      -6.554   5.981  -9.911                  1K74
ATOM    907  CB  THR D 297      -5.732   7.002 -10.690                  1K74
ATOM    908  CG2 THR D 297      -6.036   8.100 -11.702                  1K74
ATOM    909  OG1 THR D 297      -5.043   7.855  -9.780                  1K74
ATOM    910  HG1 THR D 297      -4.247   8.314 -10.052                  1K74
ATOM    911  C   THR D 297      -7.371   5.167 -10.905                  1K74
ATOM    912  O   THR D 297      -8.537   5.541 -10.799                  1K74
ATOM    913  N   GLU D 298      -6.871   4.215 -11.698                  1K74
ATOM    914  H   GLU D 298      -5.896   4.014 -11.506                  1K74
ATOM    915  CA  GLU D 298      -7.598   3.395 -12.646                  1K74
ATOM    916  CB  GLU D 298      -6.564   2.525 -13.356                  1K74
ATOM    917  CG  GLU D 298      -5.683   3.126 -14.449                  1K74
ATOM    918  CD  GLU D 298      -6.230   4.426 -15.026                  1K74
ATOM    919  OE1 GLU D 298      -7.176   4.760 -15.763                  1K74
ATOM    920  OE2 GLU D 298      -6.043   5.657 -15.001                  1K74
ATOM    921  C   GLU D 298      -8.609   2.551 -11.882                  1K74
ATOM    922  O   GLU D 298      -9.657   2.787 -12.480                  1K74
ATOM    923  N   TYR D 299      -8.332   1.797 -10.815                  1K74
ATOM    924  H   TYR D 299      -7.359   1.924 -10.567                  1K74
ATOM    925  CA  TYR D 299      -9.238   1.105  -9.925                  1K74
ATOM    926  CB  TYR D 299      -8.485   0.519  -8.732                  1K74
ATOM    927  CG  TYR D 299      -9.277  -0.466  -7.908                  1K74
ATOM    928  CD1 TYR D 299     -10.007  -1.551  -8.424                  1K74
ATOM    929  CE1 TYR D 299     -10.946  -2.236  -7.633                  1K74
ATOM    930  CZ  TYR D 299     -11.237  -1.724  -6.356                  1K74
ATOM    931  OH  TYR D 299     -12.323  -2.436  -5.946                  1K74
ATOM    932  HH  TYR D 299     -12.466  -3.381  -5.939                  1K74
ATOM    933  CE2 TYR D 299     -10.680  -0.519  -5.891                  1K74
ATOM    934  CD2 TYR D 299      -9.728   0.115  -6.709                  1K74
ATOM    935  C   TYR D 299     -10.293   2.076  -9.412                  1K74
ATOM    936  O   TYR D 299     -11.456   1.692  -9.522                  1K74
ATOM    937  N   ALA D 300     -10.240   3.289  -8.859                  1K74
ATOM    938  H   ALA D 300      -9.243   3.448  -8.949                  1K74
ATOM    939  CA  ALA D 300     -11.121   4.298  -8.305                  1K74
ATOM    940  CB  ALA D 300     -10.402   5.545  -7.812                  1K74
ATOM    941  C   ALA D 300     -12.037   4.634  -9.472                  1K74
ATOM    942  O   ALA D 300     -13.182   4.676  -9.025                  1K74
ATOM    943  N   LYS D 301     -11.822   4.841 -10.774                  1K74
ATOM    944  H   LYS D 301     -10.875   4.536 -10.967                  1K74
ATOM    945  CA  LYS D 301     -12.686   5.040 -11.922                  1K74
ATOM    946  CB  LYS D 301     -11.756   5.317 -13.099                  1K74
ATOM    947  CG  LYS D 301     -11.257   6.759 -13.101                  1K74
ATOM    948  CD  LYS D 301      -9.810   6.779 -13.583                  1K74
ATOM    949  CE  LYS D 301      -9.820   6.980 -15.096                  1K74
ATOM    950  NZ  LYS D 301      -8.446   7.141 -15.586                  1K74
ATOM    951  HZ1 LYS D 301      -7.899   6.282 -15.519                  1K74
ATOM    952  HZ2 LYS D 301      -8.460   7.207 -16.593                  1K74
ATOM    953  HZ3 LYS D 301      -7.923   7.906 -15.189                  1K74
ATOM    954  C   LYS D 301     -13.574   3.844 -12.252                  1K74
ATOM    955  O   LYS D 301     -14.543   4.194 -12.924                  1K74
ATOM    956  N   SER D 302     -13.340   2.594 -11.841                  1K74
ATOM    957  H   SER D 302     -12.629   2.423 -11.139                  1K74
ATOM    958  CA  SER D 302     -14.262   1.478 -11.940                  1K74
ATOM    959  CB  SER D 302     -13.443   0.191 -11.865                  1K74
ATOM    960  OG  SER D 302     -13.380  -0.419 -10.580                  1K74
ATOM    961  HG  SER D 302     -12.578  -0.941 -10.627                  1K74
ATOM    962  C   SER D 302     -15.249   1.580 -10.783                  1K74
ATOM    963  O   SER D 302     -16.320   1.021 -11.000                  1K74
ATOM    964  N   ILE D 303     -15.263   2.128  -9.566                  1K74
ATOM    965  H   ILE D 303     -14.468   2.754  -9.516                  1K74
ATOM    966  CA  ILE D 303     -16.099   2.198  -8.381                  1K74
ATOM    967  CB  ILE D 303     -15.675   2.871  -7.077                  1K74
ATOM    968  CG2 ILE D 303     -16.639   2.690  -5.906                  1K74
ATOM    969  CG1 ILE D 303     -14.337   2.352  -6.552                  1K74
ATOM    970  CD  ILE D 303     -13.165   2.816  -5.699                  1K74
ATOM    971  C   ILE D 303     -17.328   2.939  -8.910                  1K74
ATOM    972  O   ILE D 303     -17.196   4.107  -9.276                  1K74
ATOM    973  N   PRO D 304     -18.508   2.307  -8.961                  1K74
ATOM    974  CA  PRO D 304     -19.810   2.840  -9.323                  1K74
ATOM    975  CD  PRO D 304     -18.863   0.939  -8.633                  1K74
ATOM    976  CG  PRO D 304     -20.112   0.373  -9.299                  1K74
ATOM    977  CB  PRO D 304     -20.798   1.711  -9.037                  1K74
ATOM    978  C   PRO D 304     -20.235   4.091  -8.559                  1K74
ATOM    979  O   PRO D 304     -20.404   4.177  -7.344                  1K74
ATOM    980  N   GLY D 305     -20.362   5.121  -9.402                  1K74
ATOM    981  H   GLY D 305     -20.170   5.119 -10.395                  1K74
ATOM    982  CA  GLY D 305     -20.465   6.557  -9.222                  1K74
ATOM    983  C   GLY D 305     -19.305   7.462  -8.827                  1K74
ATOM    984  O   GLY D 305     -19.710   8.614  -8.676                  1K74
ATOM    985  N   PHE D 306     -18.064   6.984  -8.699                  1K74
ATOM    986  H   PHE D 306     -17.969   5.988  -8.856                  1K74
ATOM    987  CA  PHE D 306     -16.856   7.745  -8.436                  1K74
ATOM    988  CB  PHE D 306     -15.611   6.862  -8.407                  1K74
ATOM    989  CG  PHE D 306     -14.273   7.462  -8.049                  1K74
ATOM    990  CD1 PHE D 306     -14.090   7.821  -6.703                  1K74
ATOM    991  CE1 PHE D 306     -12.990   8.634  -6.378                  1K74
ATOM    992  CZ  PHE D 306     -12.144   9.153  -7.373                  1K74
ATOM    993  CE2 PHE D 306     -12.438   8.884  -8.721                  1K74
ATOM    994  CD2 PHE D 306     -13.479   8.008  -9.074                  1K74
ATOM    995  C   PHE D 306     -16.628   8.810  -9.502                  1K74
ATOM    996  O   PHE D 306     -16.453   9.953  -9.084                  1K74
ATOM    997  N   VAL D 307     -16.628   8.495 -10.800                  1K74
ATOM    998  H   VAL D 307     -16.886   7.552 -11.063                  1K74
ATOM    999  CA  VAL D 307     -16.436   9.352 -11.956                  1K74
ATOM   1000  CB  VAL D 307     -16.364   8.643 -13.308                  1K74
ATOM   1001  CG1 VAL D 307     -15.062   7.860 -13.455                  1K74
ATOM   1002  CG2 VAL D 307     -17.231   7.593 -13.995                  1K74
ATOM   1003  C   VAL D 307     -17.531  10.395 -12.159                  1K74
ATOM   1004  O   VAL D 307     -17.404  11.416 -12.833                  1K74
ATOM   1005  N   ASN D 308     -18.713  10.210 -11.562                  1K74
ATOM   1006  H   ASN D 308     -18.832   9.433 -10.923                  1K74
ATOM   1007  CA  ASN D 308     -19.883  11.049 -11.383                  1K74
ATOM   1008  CB  ASN D 308     -21.120  10.183 -11.140                  1K74
ATOM   1009  CG  ASN D 308     -21.463   9.457 -12.432                  1K74
ATOM   1010  OD1 ASN D 308     -21.951   8.335 -12.318                  1K74
ATOM   1011  ND2 ASN D 308     -21.289   9.858 -13.693                  1K74
ATOM   1012  HD21ASN D 308     -20.856  10.770 -13.753                  1K74
ATOM   1013  HD22ASN D 308     -21.458   9.319 -14.528                  1K74
ATOM   1014  C   ASN D 308     -19.890  12.067 -10.250                  1K74
ATOM   1015  O   ASN D 308     -20.720  12.968 -10.361                  1K74
ATOM   1016  N   LEU D 309     -18.970  11.858  -9.305                  1K74
ATOM   1017  H   LEU D 309     -18.163  11.272  -9.477                  1K74
ATOM   1018  CA  LEU D 309     -18.650  12.901  -8.349                  1K74
ATOM   1019  CB  LEU D 309     -17.713  12.303  -7.301                  1K74
ATOM   1020  CG  LEU D 309     -18.287  11.102  -6.552                  1K74
ATOM   1021  CD1 LEU D 309     -17.195  10.583  -5.624                  1K74
ATOM   1022  CD2 LEU D 309     -19.519  11.273  -5.669                  1K74
ATOM   1023  C   LEU D 309     -17.970  14.127  -8.951                  1K74
ATOM   1024  O   LEU D 309     -17.423  13.992 -10.046                  1K74
ATOM   1025  N   ASP D 310     -18.006  15.281  -8.276                  1K74
ATOM   1026  H   ASP D 310     -18.527  15.364  -7.414                  1K74
ATOM   1027  CA  ASP D 310     -17.277  16.530  -8.432                  1K74
ATOM   1028  CB  ASP D 310     -17.308  17.590  -7.328                  1K74
ATOM   1029  CG  ASP D 310     -16.811  18.984  -7.691                  1K74
ATOM   1030  OD1 ASP D 310     -15.620  19.236  -7.979                  1K74
ATOM   1031  OD2 ASP D 310     -17.459  20.049  -7.769                  1K74
ATOM   1032  C   ASP D 310     -15.804  16.174  -8.620                  1K74
ATOM   1033  O   ASP D 310     -15.230  15.545  -7.732                  1K74
ATOM   1034  N   LEU D 311     -15.259  16.570  -9.776                  1K74
ATOM   1035  H   LEU D 311     -15.764  17.138 -10.444                  1K74
ATOM   1036  CA  LEU D 311     -13.887  16.281 -10.154                  1K74
ATOM   1037  CB  LEU D 311     -13.318  16.946 -11.406                  1K74
ATOM   1038  CG  LEU D 311     -11.906  16.669 -11.914                  1K74
ATOM   1039  CD1 LEU D 311     -11.527  15.226 -12.230                  1K74
ATOM   1040  CD2 LEU D 311     -11.644  17.418 -13.215                  1K74
ATOM   1041  C   LEU D 311     -12.846  16.655  -9.102                  1K74
ATOM   1042  O   LEU D 311     -11.924  15.891  -8.819                  1K74
ATOM   1043  N   ASN D 312     -12.951  17.819  -8.453                  1K74
ATOM   1044  H   ASN D 312     -13.816  18.325  -8.619                  1K74
ATOM   1045  CA  ASN D 312     -12.266  18.337  -7.283                  1K74
ATOM   1046  CB  ASN D 312     -12.686  19.660  -6.645                  1K74
ATOM   1047  CG  ASN D 312     -12.615  20.780  -7.670                  1K74
ATOM   1048  OD1 ASN D 312     -11.434  21.102  -7.788                  1K74
ATOM   1049  ND2 ASN D 312     -13.513  21.425  -8.418                  1K74
ATOM   1050  HD21ASN D 312     -14.354  20.911  -8.185                  1K74
ATOM   1051  HD22ASN D 312     -13.174  22.174  -8.998                  1K74
ATOM   1052  C   ASN D 312     -12.364  17.360  -6.117                  1K74
ATOM   1053  O   ASN D 312     -11.289  17.139  -5.560                  1K74
ATOM   1054  N   ASP D 313     -13.482  16.749  -5.715                  1K74
ATOM   1055  H   ASP D 313     -14.269  16.921  -6.331                  1K74
ATOM   1056  CA  ASP D 313     -13.715  15.695  -4.744                  1K74
ATOM   1057  CB  ASP D 313     -15.203  15.450  -4.505                  1K74
ATOM   1058  CG  ASP D 313     -15.691  16.489  -3.511                  1K74
ATOM   1059  OD1 ASP D 313     -15.101  17.376  -2.861                  1K74
ATOM   1060  OD2 ASP D 313     -16.871  16.665  -3.142                  1K74
ATOM   1061  C   ASP D 313     -13.114  14.377  -5.212                  1K74
ATOM   1062  O   ASP D 313     -12.630  13.847  -4.212                  1K74
ATOM   1063  N   GLN D 314     -13.084  13.864  -6.446                  1K74
ATOM   1064  H   GLN D 314     -13.609  14.529  -7.003                  1K74
ATOM   1065  CA  GLN D 314     -12.336  12.728  -6.953                  1K74
ATOM   1066  CB  GLN D 314     -12.595  12.676  -8.456                  1K74
ATOM   1067  CG  GLN D 314     -13.992  12.262  -8.911                  1K74
ATOM   1068  CD  GLN D 314     -14.012  12.009 -10.411                  1K74
ATOM   1069  OE1 GLN D 314     -13.252  11.386 -11.148                  1K74
ATOM   1070  NE2 GLN D 314     -15.045  12.557 -11.051                  1K74
ATOM   1071  HE21GLN D 314     -15.781  13.065 -10.575                  1K74
ATOM   1072  HE22GLN D 314     -15.219  12.462 -12.040                  1K74
ATOM   1073  C   GLN D 314     -10.843  12.875  -6.676                  1K74
ATOM   1074  O   GLN D 314     -10.424  11.825  -6.191                  1K74
ATOM   1075  N   VAL D 315     -10.167  14.000  -6.930                  1K74
ATOM   1076  H   VAL D 315     -10.781  14.698  -7.337                  1K74
ATOM   1077  CA  VAL D 315      -8.790  14.381  -6.682                  1K74
ATOM   1078  CB  VAL D 315      -8.436  15.768  -7.212                  1K74
ATOM   1079  CG1 VAL D 315      -7.164  16.601  -7.111                  1K74
ATOM   1080  CG2 VAL D 315      -8.483  16.025  -8.715                  1K74
ATOM   1081  C   VAL D 315      -8.621  14.350  -5.168                  1K74
ATOM   1082  O   VAL D 315      -7.636  13.638  -4.984                  1K74
ATOM   1083  N   THR D 316      -9.381  14.945  -4.247                  1K74
ATOM   1084  H   THR D 316     -10.159  15.408  -4.702                  1K74
ATOM   1085  CA  THR D 316      -9.226  14.912  -2.806                  1K74
ATOM   1086  CB  THR D 316     -10.252  15.648  -1.951                  1K74
ATOM   1087  CG2 THR D 316     -10.394  15.930  -0.461                  1K74
ATOM   1088  OG1 THR D 316     -10.266  16.992  -2.421                  1K74
ATOM   1089  HG1 THR D 316     -10.985  17.584  -2.199                  1K74
ATOM   1090  C   THR D 316      -9.259  13.485  -2.277                  1K74
ATOM   1091  O   THR D 316      -8.324  13.213  -1.525                  1K74
ATOM   1092  N   LEU D 317     -10.224  12.639  -2.648                  1K74
ATOM   1093  H   LEU D 317     -10.855  13.018  -3.345                  1K74
ATOM   1094  CA  LEU D 317     -10.371  11.244  -2.283                  1K74
ATOM   1095  CB  LEU D 317     -11.609  10.628  -2.928                  1K74
ATOM   1096  CG  LEU D 317     -12.928  11.197  -2.416                  1K74
ATOM   1097  CD1 LEU D 317     -14.019  10.362  -3.077                  1K74
ATOM   1098  CD2 LEU D 317     -13.297  11.226  -0.938                  1K74
ATOM   1099  C   LEU D 317      -9.137  10.485  -2.753                  1K74
ATOM   1100  O   LEU D 317      -8.859   9.781  -1.785                  1K74
ATOM   1101  N   LEU D 318      -8.440  10.523  -3.889                  1K74
ATOM   1102  H   LEU D 318      -8.947  11.247  -4.383                  1K74
ATOM   1103  CA  LEU D 318      -7.166   9.945  -4.269                  1K74
ATOM   1104  CB  LEU D 318      -7.104  10.198  -5.773                  1K74
ATOM   1105  CG  LEU D 318      -7.512   9.005  -6.630                  1K74
ATOM   1106  CD1 LEU D 318      -8.442   7.832  -6.352                  1K74
ATOM   1107  CD2 LEU D 318      -8.166   9.659  -7.842                  1K74
ATOM   1108  C   LEU D 318      -6.050  10.646  -3.508                  1K74
ATOM   1109  O   LEU D 318      -5.438   9.624  -3.203                  1K74
ATOM   1110  N   LYS D 319      -5.858  11.945  -3.261                  1K74
ATOM   1111  H   LYS D 319      -6.655  12.377  -3.714                  1K74
ATOM   1112  CA  LYS D 319      -4.822  12.576  -2.465                  1K74
ATOM   1113  CB  LYS D 319      -5.253  14.040  -2.463                  1K74
ATOM   1114  CG  LYS D 319      -4.129  14.805  -1.774                  1K74
ATOM   1115  CD  LYS D 319      -4.576  16.204  -1.360                  1K74
ATOM   1116  CE  LYS D 319      -3.465  16.973  -0.650                  1K74
ATOM   1117  NZ  LYS D 319      -2.407  17.224  -1.639                  1K74
ATOM   1118  HZ1 LYS D 319      -2.429  17.782  -2.477                  1K74
ATOM   1119  HZ2 LYS D 319      -1.659  17.702  -1.144                  1K74
ATOM   1120  HZ3 LYS D 319      -1.781  16.432  -1.710                  1K74
ATOM   1121  C   LYS D 319      -4.866  11.905  -1.095                  1K74
ATOM   1122  O   LYS D 319      -3.741  11.471  -0.860                  1K74
ATOM   1123  N   TYR D 320      -5.924  11.784  -0.290                  1K74
ATOM   1124  H   TYR D 320      -6.759  12.076  -0.783                  1K74
ATOM   1125  CA  TYR D 320      -5.847  11.228   1.047                  1K74
ATOM   1126  CB  TYR D 320      -7.032  11.876   1.754                  1K74
ATOM   1127  CG  TYR D 320      -6.771  13.276   2.248                  1K74
ATOM   1128  CD1 TYR D 320      -7.253  14.273   1.382                  1K74
ATOM   1129  CE1 TYR D 320      -6.955  15.617   1.660                  1K74
ATOM   1130  CZ  TYR D 320      -6.135  15.908   2.764                  1K74
ATOM   1131  OH  TYR D 320      -5.807  17.218   2.941                  1K74
ATOM   1132  HH  TYR D 320      -6.168  17.920   2.396                  1K74
ATOM   1133  CE2 TYR D 320      -5.631  14.911   3.617                  1K74
ATOM   1134  CD2 TYR D 320      -5.936  13.568   3.340                  1K74
ATOM   1135  C   TYR D 320      -5.949   9.708   1.077                  1K74
ATOM   1136  O   TYR D 320      -5.393   9.264   2.080                  1K74
ATOM   1137  N   GLY D 321      -6.556   8.981   0.135                  1K74
ATOM   1138  H   GLY D 321      -6.982   9.470  -0.643                  1K74
ATOM   1139  CA  GLY D 321      -6.825   7.581  -0.126                  1K74
ATOM   1140  C   GLY D 321      -5.580   6.746  -0.395                  1K74
ATOM   1141  O   GLY D 321      -5.530   5.736   0.304                  1K74
ATOM   1142  N   VAL D 322      -4.717   7.171  -1.322                  1K74
ATOM   1143  H   VAL D 322      -4.945   8.071  -1.729                  1K74
ATOM   1144  CA  VAL D 322      -3.598   6.480  -1.936                  1K74
ATOM   1145  CB  VAL D 322      -2.808   7.441  -2.824                  1K74
ATOM   1146  CG1 VAL D 322      -1.449   7.899  -3.338                  1K74
ATOM   1147  CG2 VAL D 322      -3.262   7.257  -4.269                  1K74
ATOM   1148  C   VAL D 322      -2.600   5.884  -0.951                  1K74
ATOM   1149  O   VAL D 322      -2.520   4.705  -1.292                  1K74
ATOM   1150  N   HIS D 323      -2.020   6.611   0.008                  1K74
ATOM   1151  H   HIS D 323      -2.354   7.561   0.089                  1K74
ATOM   1152  CA  HIS D 323      -0.991   6.061   0.872                  1K74
ATOM   1153  CB  HIS D 323      -0.257   7.076   1.747                  1K74
ATOM   1154  CG  HIS D 323       0.819   7.681   0.886                  1K74
ATOM   1155  ND1 HIS D 323       0.585   8.850   0.181                  1K74
ATOM   1156  HD1 HIS D 323      -0.242   9.430   0.157                  1K74
ATOM   1157  CE1 HIS D 323       1.637   9.101  -0.616                  1K74
ATOM   1158  NE2 HIS D 323       2.358   7.979  -0.643                  1K74
ATOM   1159  CD2 HIS D 323       2.024   7.182   0.449                  1K74
ATOM   1160  C   HIS D 323      -1.554   5.026   1.839                  1K74
ATOM   1161  O   HIS D 323      -0.769   4.088   1.966                  1K74
ATOM   1162  N   GLU D 324      -2.762   5.196   2.387                  1K74
ATOM   1163  H   GLU D 324      -3.381   5.914   2.027                  1K74
ATOM   1164  CA  GLU D 324      -3.559   4.282   3.182                  1K74
ATOM   1165  CB  GLU D 324      -4.963   4.765   3.540                  1K74
ATOM   1166  CG  GLU D 324      -4.863   5.995   4.439                  1K74
ATOM   1167  CD  GLU D 324      -6.299   6.379   4.775                  1K74
ATOM   1168  OE1 GLU D 324      -7.525   6.184   4.834                  1K74
ATOM   1169  OE2 GLU D 324      -6.651   7.470   5.266                  1K74
ATOM   1170  C   GLU D 324      -3.734   2.967   2.431                  1K74
ATOM   1171  O   GLU D 324      -3.486   1.923   3.032                  1K74
ATOM   1172  N   ILE D 325      -4.105   2.886   1.148                  1K74
ATOM   1173  H   ILE D 325      -4.220   3.809   0.745                  1K74
ATOM   1174  CA  ILE D 325      -4.249   1.827   0.167                  1K74
ATOM   1175  CB  ILE D 325      -4.809   1.997  -1.243                  1K74
ATOM   1176  CG2 ILE D 325      -4.967   0.945  -2.338                  1K74
ATOM   1177  CG1 ILE D 325      -6.251   2.485  -1.133                  1K74
ATOM   1178  CD  ILE D 325      -7.276   3.374  -1.814                  1K74
ATOM   1179  C   ILE D 325      -2.816   1.337  -0.010                  1K74
ATOM   1180  O   ILE D 325      -2.832   0.117   0.144                  1K74
ATOM   1181  N   ILE D 326      -1.675   1.979  -0.273                  1K74
ATOM   1182  H   ILE D 326      -1.926   2.959  -0.226                  1K74
ATOM   1183  CA  ILE D 326      -0.312   1.570  -0.564                  1K74
ATOM   1184  CB  ILE D 326       0.815   2.579  -0.780                  1K74
ATOM   1185  CG2 ILE D 326       2.321   2.359  -0.920                  1K74
ATOM   1186  CG1 ILE D 326       0.622   3.363  -2.078                  1K74
ATOM   1187  CD  ILE D 326       0.812   4.718  -2.745                  1K74
ATOM   1188  C   ILE D 326       0.065   0.727   0.649                  1K74
ATOM   1189  O   ILE D 326       0.498  -0.343   0.228                  1K74
ATOM   1190  N   TYR D 327      -0.063   1.052   1.938                  1K74
ATOM   1191  H   TYR D 327      -0.562   1.934   1.937                  1K74
ATOM   1192  CA  TYR D 327       0.301   0.361   3.159                  1K74
ATOM   1193  CB  TYR D 327       0.160   1.371   4.296                  1K74
ATOM   1194  CG  TYR D 327       1.240   2.426   4.313                  1K74
ATOM   1195  CD1 TYR D 327       2.491   2.352   3.673                  1K74
ATOM   1196  CE1 TYR D 327       3.266   3.477   3.351                  1K74
ATOM   1197  CZ  TYR D 327       2.790   4.695   3.867                  1K74
ATOM   1198  OH  TYR D 327       3.642   5.727   3.617                  1K74
ATOM   1199  HH  TYR D 327       4.473   5.657   3.143                  1K74
ATOM   1200  CE2 TYR D 327       1.527   4.875   4.458                  1K74
ATOM   1201  CD2 TYR D 327       0.789   3.703   4.691                  1K74
ATOM   1202  C   TYR D 327      -0.666  -0.806   3.290                  1K74
ATOM   1203  O   TYR D 327       0.020  -1.717   3.748                  1K74
ATOM   1204  N   THR D 328      -1.958  -0.913   2.975                  1K74
ATOM   1205  H   THR D 328      -2.215  -0.019   2.571                  1K74
ATOM   1206  CA  THR D 328      -2.858  -2.050   2.982                  1K74
ATOM   1207  CB  THR D 328      -4.274  -1.688   2.541                  1K74
ATOM   1208  CG2 THR D 328      -5.459  -2.624   2.320                  1K74
ATOM   1209  OG1 THR D 328      -4.904  -0.797   3.456                  1K74
ATOM   1210  HG1 THR D 328      -5.698  -0.369   3.135                  1K74
ATOM   1211  C   THR D 328      -2.236  -3.050   2.013                  1K74
ATOM   1212  O   THR D 328      -2.033  -4.109   2.604                  1K74
ATOM   1213  N   MET D 329      -1.949  -2.782   0.735                  1K74
ATOM   1214  H   MET D 329      -2.096  -1.797   0.551                  1K74
ATOM   1215  CA  MET D 329      -1.449  -3.703  -0.269                  1K74
ATOM   1216  CB  MET D 329      -1.617  -2.927  -1.574                  1K74
ATOM   1217  CG  MET D 329      -3.045  -2.766  -2.095                  1K74
ATOM   1218  SD  MET D 329      -3.336  -2.359  -3.834                  1K74
ATOM   1219  CE  MET D 329      -3.838  -4.049  -4.193                  1K74
ATOM   1220  LP1 MET D 329      -3.490  -3.004  -3.821                  1K74
ATOM   1221  LP2 MET D 329      -3.182  -1.746  -3.555                  1K74
ATOM   1222  C   MET D 329       0.001  -4.021   0.085                  1K74
ATOM   1223  O   MET D 329       0.270  -5.175  -0.247                  1K74
ATOM   1224  N   LEU D 330       0.910  -3.251   0.689                  1K74
ATOM   1225  H   LEU D 330       0.517  -2.339   0.891                  1K74
ATOM   1226  CA  LEU D 330       2.239  -3.462   1.226                  1K74
ATOM   1227  CB  LEU D 330       2.856  -2.261   1.941                  1K74
ATOM   1228  CG  LEU D 330       4.332  -2.393   2.310                  1K74
ATOM   1229  CD1 LEU D 330       5.318  -2.566   1.158                  1K74
ATOM   1230  CD2 LEU D 330       4.708  -1.112   3.048                  1K74
ATOM   1231  C   LEU D 330       2.159  -4.609   2.227                  1K74
ATOM   1232  O   LEU D 330       3.121  -5.331   1.967                  1K74
ATOM   1233  N   ALA D 331       1.256  -4.851   3.184                  1K74
ATOM   1234  H   ALA D 331       0.603  -4.089   3.046                  1K74
ATOM   1235  CA  ALA D 331       0.990  -5.906   4.145                  1K74
ATOM   1236  CB  ALA D 331      -0.325  -5.718   4.901                  1K74
ATOM   1237  C   ALA D 331       0.953  -7.180   3.306                  1K74
ATOM   1238  O   ALA D 331       1.617  -8.096   3.789                  1K74
ATOM   1239  N   SER D 332       0.343  -7.399   2.136                  1K74
ATOM   1240  H   SER D 332       0.030  -6.527   1.722                  1K74
ATOM   1241  CA  SER D 332       0.197  -8.467   1.166                  1K74
ATOM   1242  CB  SER D 332      -0.532  -8.230  -0.154                  1K74
ATOM   1243  OG  SER D 332      -1.887  -8.257   0.280                  1K74
ATOM   1244  HG  SER D 332      -2.343  -7.855  -0.461                  1K74
ATOM   1245  C   SER D 332       1.623  -8.863   0.805                  1K74
ATOM   1246  O   SER D 332       1.826 -10.069   0.664                  1K74
ATOM   1247  N   LEU D 333       2.732  -8.143   0.618                  1K74
ATOM   1248  H   LEU D 333       2.559  -7.170   0.845                  1K74
ATOM   1249  CA  LEU D 333       4.122  -8.454   0.324                  1K74
ATOM   1250  CB  LEU D 333       4.624  -7.198  -0.390                  1K74
ATOM   1251  CG  LEU D 333       3.900  -6.698  -1.639                  1K74
ATOM   1252  CD1 LEU D 333       4.790  -5.637  -2.276                  1K74
ATOM   1253  CD2 LEU D 333       3.531  -7.629  -2.790                  1K74
ATOM   1254  C   LEU D 333       5.079  -8.784   1.466                  1K74
ATOM   1255  O   LEU D 333       6.265  -9.090   1.350                  1K74
ATOM   1256  N   MET D 334       4.522  -8.721   2.680                  1K74
ATOM   1257  H   MET D 334       3.563  -8.478   2.904                  1K74
ATOM   1258  CA  MET D 334       5.196  -8.604   3.958                  1K74
ATOM   1259  CB  MET D 334       4.983  -7.475   4.962                  1K74
ATOM   1260  CG  MET D 334       5.344  -6.203   4.201                  1K74
ATOM   1261  SD  MET D 334       5.007  -4.899   5.403                  1K74
ATOM   1262  CE  MET D 334       6.559  -4.009   5.158                  1K74
ATOM   1263  LP1 MET D 334       5.569  -4.935   5.778                  1K74
ATOM   1264  LP2 MET D 334       4.373  -5.007   5.621                  1K74
ATOM   1265  C   MET D 334       4.797  -9.885   4.677                  1K74
ATOM   1266  O   MET D 334       3.885 -10.707   4.619                  1K74
ATOM   1267  N   ASN D 335       5.445 -10.498   5.669                  1K74
ATOM   1268  H   ASN D 335       6.340 -10.023   5.737                  1K74
ATOM   1269  CA  ASN D 335       5.353 -11.374   6.825                  1K74
ATOM   1270  CB  ASN D 335       5.961 -12.596   6.143                  1K74
ATOM   1271  CG  ASN D 335       7.343 -13.081   5.732                  1K74
ATOM   1272  OD1 ASN D 335       8.057 -13.932   5.209                  1K74
ATOM   1273  ND2 ASN D 335       8.440 -12.381   6.033                  1K74
ATOM   1274  HD21ASN D 335       8.086 -11.649   6.636                  1K74
ATOM   1275  HD22ASN D 335       9.389 -12.228   6.342                  1K74
ATOM   1276  C   ASN D 335       6.147 -10.782   7.985                  1K74
ATOM   1277  O   ASN D 335       6.677  -9.674   7.933                  1K74
ATOM   1278  N   LYS D 336       6.292 -11.503   9.101                  1K74
ATOM   1279  H   LYS D 336       5.774 -12.371   9.031                  1K74
ATOM   1280  CA  LYS D 336       7.053 -11.194  10.301                  1K74
ATOM   1281  CB  LYS D 336       6.950 -12.411  11.221                  1K74
ATOM   1282  CG  LYS D 336       5.643 -12.266  11.996                  1K74
ATOM   1283  CD  LYS D 336       5.199 -13.598  12.590                  1K74
ATOM   1284  CE  LYS D 336       3.945 -13.468  13.449                  1K74
ATOM   1285  NZ  LYS D 336       3.415 -14.707  14.040                  1K74
ATOM   1286  HZ1 LYS D 336       4.159 -15.095  14.603                  1K74
ATOM   1287  HZ2 LYS D 336       2.588 -14.489  14.577                  1K74
ATOM   1288  HZ3 LYS D 336       3.203 -15.343  13.285                  1K74
ATOM   1289  C   LYS D 336       8.538 -10.873  10.144                  1K74
ATOM   1290  O   LYS D 336       9.031 -10.095  10.959                  1K74
ATOM   1291  N   ASP D 337       9.219 -11.437   9.140                  1K74
ATOM   1292  H   ASP D 337       8.758 -12.133   8.566                  1K74
ATOM   1293  CA  ASP D 337      10.637 -11.427   8.821                  1K74
ATOM   1294  CB  ASP D 337      11.078 -12.815   8.356                  1K74
ATOM   1295  CG  ASP D 337      10.857 -13.897   9.405                  1K74
ATOM   1296  OD1 ASP D 337      10.921 -13.816  10.650                  1K74
ATOM   1297  OD2 ASP D 337      10.544 -15.003   8.915                  1K74
ATOM   1298  C   ASP D 337      11.114 -10.475   7.730                  1K74
ATOM   1299  O   ASP D 337      12.296 -10.137   7.690                  1K74
ATOM   1300  N   GLY D 338      10.462  -9.898   6.716                  1K74
ATOM   1301  H   GLY D 338       9.493 -10.196   6.701                  1K74
ATOM   1302  CA  GLY D 338      10.532  -9.079   5.522                  1K74
ATOM   1303  C   GLY D 338       9.361  -8.936   4.560                  1K74
ATOM   1304  O   GLY D 338       8.234  -9.401   4.726                  1K74
ATOM   1305  N   VAL D 339       9.854  -8.211   3.553                  1K74
ATOM   1306  H   VAL D 339      10.801  -7.844   3.502                  1K74
ATOM   1307  CA  VAL D 339       9.101  -7.822   2.378                  1K74
ATOM   1308  CB  VAL D 339       8.914  -6.315   2.560                  1K74
ATOM   1309  CG1 VAL D 339       9.717  -5.026   2.438                  1K74
ATOM   1310  CG2 VAL D 339       7.927  -5.414   1.826                  1K74
ATOM   1311  C   VAL D 339       9.850  -8.153   1.092                  1K74
ATOM   1312  O   VAL D 339      11.036  -8.104   0.775                  1K74
ATOM   1313  N   LEU D 340       8.903  -8.557   0.242                  1K74
ATOM   1314  H   LEU D 340       7.911  -8.595   0.450                  1K74
ATOM   1315  CA  LEU D 340       9.033  -8.755  -1.188                  1K74
ATOM   1316  CB  LEU D 340       7.888  -9.422  -1.947                  1K74
ATOM   1317  CG  LEU D 340       7.681 -10.919  -1.752                  1K74
ATOM   1318  CD1 LEU D 340       6.412 -11.314  -2.500                  1K74
ATOM   1319  CD2 LEU D 340       8.816 -11.792  -2.274                  1K74
ATOM   1320  C   LEU D 340       9.220  -7.445  -1.942                  1K74
ATOM   1321  O   LEU D 340       8.451  -6.514  -1.701                  1K74
ATOM   1322  N   ILE D 341      10.238  -7.430  -2.807                  1K74
ATOM   1323  H   ILE D 341      10.802  -8.250  -2.994                  1K74
ATOM   1324  CA  ILE D 341      10.644  -6.212  -3.483                  1K74
ATOM   1325  CB  ILE D 341      11.954  -5.642  -2.941                  1K74
ATOM   1326  CG2 ILE D 341      11.923  -5.120  -1.505                  1K74
ATOM   1327  CG1 ILE D 341      13.343  -6.239  -2.739                  1K74
ATOM   1328  CD  ILE D 341      14.740  -5.896  -3.234                  1K74
ATOM   1329  C   ILE D 341      10.769  -6.662  -4.934                  1K74
ATOM   1330  O   ILE D 341      11.081  -7.747  -5.417                  1K74
ATOM   1331  N   SER D 342      10.499  -5.792  -5.912                  1K74
ATOM   1332  H   SER D 342       9.959  -4.969  -5.677                  1K74
ATOM   1333  CA  SER D 342      10.769  -5.491  -7.308                  1K74
ATOM   1334  CB  SER D 342      12.159  -5.686  -7.918                  1K74
ATOM   1335  OG  SER D 342      13.094  -4.980  -7.107                  1K74
ATOM   1336  HG  SER D 342      13.845  -5.536  -7.311                  1K74
ATOM   1337  C   SER D 342       9.782  -6.450  -7.964                  1K74
ATOM   1338  O   SER D 342      10.075  -7.497  -8.537                  1K74
ATOM   1339  N   GLU D 343       8.481  -6.650  -8.190                  1K74
ATOM   1340  H   GLU D 343       8.069  -5.775  -7.898                  1K74
ATOM   1341  CA  GLU D 343       7.342  -7.446  -8.621                  1K74
ATOM   1342  CB  GLU D 343       7.418  -7.582 -10.142                  1K74
ATOM   1343  CG  GLU D 343       7.222  -6.409 -11.099                  1K74
ATOM   1344  CD  GLU D 343       7.730  -6.575 -12.524                  1K74
ATOM   1345  OE1 GLU D 343       7.185  -7.495 -13.171                  1K74
ATOM   1346  OE2 GLU D 343       8.633  -5.775 -12.847                  1K74
ATOM   1347  C   GLU D 343       7.314  -8.839  -7.992                  1K74
ATOM   1348  O   GLU D 343       6.806  -9.884  -8.395                  1K74
ATOM   1349  N   GLY D 344       7.875  -9.179  -6.825                  1K74
ATOM   1350  H   GLY D 344       8.469  -8.399  -6.567                  1K74
ATOM   1351  CA  GLY D 344       8.311 -10.266  -5.966                  1K74
ATOM   1352  C   GLY D 344       9.641 -10.866  -6.405                  1K74
ATOM   1353  O   GLY D 344       9.951 -11.890  -5.799                  1K74
ATOM   1354  N   GLN D 345      10.544 -10.465  -7.305                  1K74
ATOM   1355  H   GLN D 345      10.273  -9.553  -7.656                  1K74
ATOM   1356  CA  GLN D 345      11.855 -10.789  -7.840                  1K74
ATOM   1357  CB  GLN D 345      12.423  -9.804  -8.858                  1K74
ATOM   1358  CG  GLN D 345      11.831 -10.033 -10.244                  1K74
ATOM   1359  CD  GLN D 345      11.818  -8.811 -11.147                  1K74
ATOM   1360  OE1 GLN D 345      12.873  -8.848 -11.778                  1K74
ATOM   1361  NE2 GLN D 345      10.961  -7.812 -11.360                  1K74
ATOM   1362  HE21GLN D 345      10.107  -7.714 -10.829                  1K74
ATOM   1363  HE22GLN D 345      11.081  -7.100 -12.067                  1K74
ATOM   1364  C   GLN D 345      12.707 -10.814  -6.574                  1K74
ATOM   1365  O   GLN D 345      13.571 -11.666  -6.753                  1K74
ATOM   1366  N   GLY D 346      12.783 -10.235  -5.376                  1K74
ATOM   1367  H   GLY D 346      11.863  -9.819  -5.276                  1K74
ATOM   1368  CA  GLY D 346      13.554  -9.951  -4.184                  1K74
ATOM   1369  C   GLY D 346      12.731 -10.008  -2.905                  1K74
ATOM   1370  O   GLY D 346      11.501 -10.019  -2.902                  1K74
ATOM   1371  N   PHE D 347      13.524 -10.031  -1.831                  1K74
ATOM   1372  H   PHE D 347      14.531 -10.110  -1.919                  1K74
ATOM   1373  CA  PHE D 347      13.047 -10.071  -0.464                  1K74
ATOM   1374  CB  PHE D 347      12.814 -11.518  -0.031                  1K74
ATOM   1375  CG  PHE D 347      12.069 -11.655   1.275                  1K74
ATOM   1376  CD1 PHE D 347      10.682 -11.425   1.283                  1K74
ATOM   1377  CE1 PHE D 347       9.984 -11.551   2.496                  1K74
ATOM   1378  CZ  PHE D 347      10.649 -11.967   3.662                  1K74
ATOM   1379  CE2 PHE D 347      12.053 -12.014   3.677                  1K74
ATOM   1380  CD2 PHE D 347      12.767 -11.901   2.471                  1K74
ATOM   1381  C   PHE D 347      14.074  -9.425   0.455                  1K74
ATOM   1382  O   PHE D 347      15.133  -9.934   0.820                  1K74
ATOM   1383  N   MET D 348      13.843  -8.214   0.967                  1K74
ATOM   1384  H   MET D 348      12.909  -7.885   0.740                  1K74
ATOM   1385  CA  MET D 348      14.460  -7.389   1.986                  1K74
ATOM   1386  CB  MET D 348      14.285  -5.898   1.715                  1K74
ATOM   1387  CG  MET D 348      15.744  -5.474   1.844                  1K74
ATOM   1388  SD  MET D 348      15.799  -3.772   1.228                  1K74
ATOM   1389  CE  MET D 348      16.366  -3.844  -0.487                  1K74
ATOM   1390  LP1 MET D 348      15.449  -3.227   1.414                  1K74
ATOM   1391  LP2 MET D 348      15.702  -3.586   0.589                  1K74
ATOM   1392  C   MET D 348      13.857  -7.683   3.355                  1K74
ATOM   1393  O   MET D 348      12.665  -7.615   3.651                  1K74
ATOM   1394  N   THR D 349      14.821  -8.028   4.213                  1K74
ATOM   1395  H   THR D 349      15.816  -8.124   4.051                  1K74
ATOM   1396  CA  THR D 349      14.553  -8.492   5.563                  1K74
ATOM   1397  CB  THR D 349      15.480  -9.276   6.494                  1K74
ATOM   1398  CG2 THR D 349      15.621 -10.644   5.836                  1K74
ATOM   1399  OG1 THR D 349      16.799  -8.813   6.764                  1K74
ATOM   1400  HG1 THR D 349      17.475  -9.141   7.358                  1K74
ATOM   1401  C   THR D 349      14.243  -7.247   6.392                  1K74
ATOM   1402  O   THR D 349      14.816  -6.160   6.297                  1K74
ATOM   1403  N   ARG D 350      13.275  -7.333   7.313                  1K74
ATOM   1404  H   ARG D 350      12.872  -8.259   7.415                  1K74
ATOM   1405  CA  ARG D 350      12.819  -6.455   8.379                  1K74
ATOM   1406  CB  ARG D 350      11.782  -7.098   9.299                  1K74
ATOM   1407  CG  ARG D 350      11.263  -6.100  10.331                  1K74
ATOM   1408  CD  ARG D 350      10.239  -7.075  10.890                  1K74
ATOM   1409  NE  ARG D 350       9.526  -6.366  11.951                  1K74
ATOM   1410  HE  ARG D 350       9.782  -5.438  12.287                  1K74
ATOM   1411  CZ  ARG D 350       8.463  -6.770  12.658                  1K74
ATOM   1412  NH1 ARG D 350       7.857  -7.966  12.644                  1K74
ATOM   1413  HH11ARG D 350       8.336  -8.579  11.990                  1K74
ATOM   1414  HH12ARG D 350       7.028  -8.380  13.040                  1K74
ATOM   1415  NH2 ARG D 350       7.743  -6.069  13.542                  1K74
ATOM   1416  HH21ARG D 350       8.293  -5.246  13.781                  1K74
ATOM   1417  HH22ARG D 350       7.109  -6.217  14.311                  1K74
ATOM   1418  C   ARG D 350      14.028  -6.052   9.222                  1K74
ATOM   1419  O   ARG D 350      14.021  -4.827   9.331                  1K74
ATOM   1420  N   GLU D 351      14.954  -6.865   9.740                  1K74
ATOM   1421  H   GLU D 351      14.748  -7.797   9.405                  1K74
ATOM   1422  CA  GLU D 351      16.170  -6.482  10.436                  1K74
ATOM   1423  CB  GLU D 351      16.792  -7.848  10.706                  1K74
ATOM   1424  CG  GLU D 351      17.658  -7.920  11.959                  1K74
ATOM   1425  CD  GLU D 351      18.194  -9.311  12.260                  1K74
ATOM   1426  OE1 GLU D 351      18.746  -9.265  13.380                  1K74
ATOM   1427  OE2 GLU D 351      18.121 -10.355  11.578                  1K74
ATOM   1428  C   GLU D 351      17.100  -5.587   9.627                  1K74
ATOM   1429  O   GLU D 351      17.411  -4.667  10.379                  1K74
ATOM   1430  N   PHE D 352      17.370  -5.917   8.361                  1K74
ATOM   1431  H   PHE D 352      16.822  -6.672   7.972                  1K74
ATOM   1432  CA  PHE D 352      18.048  -5.041   7.432                  1K74
ATOM   1433  CB  PHE D 352      18.075  -5.505   5.980                  1K74
ATOM   1434  CG  PHE D 352      19.044  -4.963   4.963                  1K74
ATOM   1435  CD1 PHE D 352      20.309  -4.425   5.253                  1K74
ATOM   1436  CE1 PHE D 352      20.860  -3.544   4.307                  1K74
ATOM   1437  CZ  PHE D 352      20.088  -3.008   3.262                  1K74
ATOM   1438  CE2 PHE D 352      18.746  -3.417   3.170                  1K74
ATOM   1439  CD2 PHE D 352      18.169  -4.347   4.052                  1K74
ATOM   1440  C   PHE D 352      17.486  -3.634   7.290                  1K74
ATOM   1441  O   PHE D 352      18.233  -2.671   7.444                  1K74
ATOM   1442  N   LEU D 353      16.193  -3.479   6.991                  1K74
ATOM   1443  H   LEU D 353      15.744  -4.377   6.857                  1K74
ATOM   1444  CA  LEU D 353      15.520  -2.196   6.897                  1K74
ATOM   1445  CB  LEU D 353      14.088  -2.510   6.464                  1K74
ATOM   1446  CG  LEU D 353      14.020  -2.907   4.990                  1K74
ATOM   1447  CD1 LEU D 353      12.720  -3.679   4.788                  1K74
ATOM   1448  CD2 LEU D 353      14.036  -1.718   4.034                  1K74
ATOM   1449  C   LEU D 353      15.533  -1.431   8.219                  1K74
ATOM   1450  O   LEU D 353      15.772  -0.248   7.991                  1K74
ATOM   1451  N   LYS D 354      15.351  -2.078   9.375                  1K74
ATOM   1452  H   LYS D 354      15.339  -3.086   9.257                  1K74
ATOM   1453  CA  LYS D 354      15.613  -1.517  10.687                  1K74
ATOM   1454  CB  LYS D 354      15.293  -2.656  11.652                  1K74
ATOM   1455  CG  LYS D 354      15.023  -2.242  13.095                  1K74
ATOM   1456  CD  LYS D 354      14.627  -3.525  13.817                  1K74
ATOM   1457  CE  LYS D 354      14.620  -3.184  15.304                  1K74
ATOM   1458  NZ  LYS D 354      14.181  -4.343  16.096                  1K74
ATOM   1459  HZ1 LYS D 354      14.773  -5.145  15.929                  1K74
ATOM   1460  HZ2 LYS D 354      14.208  -4.123  17.082                  1K74
ATOM   1461  HZ3 LYS D 354      13.234  -4.539  15.802                  1K74
ATOM   1462  C   LYS D 354      17.039  -1.036  10.932                  1K74
ATOM   1463  O   LYS D 354      17.215  -0.028  11.613                  1K74
ATOM   1464  N   SER D 355      18.113  -1.665  10.443                  1K74
ATOM   1465  H   SER D 355      17.941  -2.413   9.781                  1K74
ATOM   1466  CA  SER D 355      19.526  -1.357  10.561                  1K74
ATOM   1467  CB  SER D 355      20.180  -2.685  10.181                  1K74
ATOM   1468  OG  SER D 355      20.732  -2.928   8.892                  1K74
ATOM   1469  HG  SER D 355      21.367  -3.617   8.701                  1K74
ATOM   1470  C   SER D 355      19.937  -0.220   9.632                  1K74
ATOM   1471  O   SER D 355      21.091   0.077   9.943                  1K74
ATOM   1472  N   LEU D 356      19.206   0.349   8.668                  1K74
ATOM   1473  H   LEU D 356      18.307  -0.093   8.527                  1K74
ATOM   1474  CA  LEU D 356      19.548   1.557   7.944                  1K74
ATOM   1475  CB  LEU D 356      18.375   1.916   7.034                  1K74
ATOM   1476  CG  LEU D 356      18.091   0.941   5.895                  1K74
ATOM   1477  CD1 LEU D 356      16.888   1.487   5.133                  1K74
ATOM   1478  CD2 LEU D 356      19.142   0.653   4.827                  1K74
ATOM   1479  C   LEU D 356      19.846   2.772   8.812                  1K74
ATOM   1480  O   LEU D 356      19.262   2.982   9.873                  1K74
ATOM   1481  N   ARG D 357      20.803   3.554   8.301                  1K74
ATOM   1482  H   ARG D 357      21.018   3.447   7.318                  1K74
ATOM   1483  CA  ARG D 357      21.373   4.663   9.041                  1K74
ATOM   1484  CB  ARG D 357      22.482   5.336   8.235                  1K74
ATOM   1485  CG  ARG D 357      22.442   6.156   6.951                  1K74
ATOM   1486  CD  ARG D 357      23.438   7.282   7.206                  1K74
ATOM   1487  NE  ARG D 357      22.822   8.514   6.718                  1K74
ATOM   1488  HE  ARG D 357      22.165   8.526   5.953                  1K74
ATOM   1489  CZ  ARG D 357      21.835   9.413   6.781                  1K74
ATOM   1490  NH1 ARG D 357      20.785   9.291   7.599                  1K74
ATOM   1491  HH11ARG D 357      21.027   8.490   8.165                  1K74
ATOM   1492  HH12ARG D 357      20.136   9.981   7.944                  1K74
ATOM   1493  NH2 ARG D 357      21.758  10.545   6.079                  1K74
ATOM   1494  HH21ARG D 357      22.250  10.987   5.316                  1K74
ATOM   1495  HH22ARG D 357      21.102  11.320   6.150                  1K74
ATOM   1496  C   ARG D 357      20.329   5.726   9.362                  1K74
ATOM   1497  O   ARG D 357      19.340   6.016   8.692                  1K74
ATOM   1498  N   LYS D 358      20.575   6.380  10.500                  1K74
ATOM   1499  H   LYS D 358      21.443   6.155  10.967                  1K74
ATOM   1500  CA  LYS D 358      19.756   7.169  11.403                  1K74
ATOM   1501  CB  LYS D 358      20.746   8.291  11.138                  1K74
ATOM   1502  CG  LYS D 358      21.959   9.096  10.710                  1K74
ATOM   1503  CD  LYS D 358      22.727   9.079  12.027                  1K74
ATOM   1504  CE  LYS D 358      24.159   9.017  11.504                  1K74
ATOM   1505  NZ  LYS D 358      24.797  10.017  10.632                  1K74
ATOM   1506  HZ1 LYS D 358      24.451  10.899  10.978                  1K74
ATOM   1507  HZ2 LYS D 358      25.785   9.821  10.590                  1K74
ATOM   1508  HZ3 LYS D 358      24.339   9.887   9.741                  1K74
ATOM   1509  C   LYS D 358      18.288   7.499  11.172                  1K74
ATOM   1510  O   LYS D 358      18.087   6.422  11.725                  1K74
ATOM   1511  N   PRO D 359      17.463   8.414  10.653                  1K74
ATOM   1512  CA  PRO D 359      16.049   8.117  10.516                  1K74
ATOM   1513  CD  PRO D 359      17.339   9.663   9.927                  1K74
ATOM   1514  CG  PRO D 359      16.253  10.333   9.089                  1K74
ATOM   1515  CB  PRO D 359      15.581   9.538  10.204                  1K74
ATOM   1516  C   PRO D 359      15.512   7.130   9.483                  1K74
ATOM   1517  O   PRO D 359      14.398   6.686   9.754                  1K74
ATOM   1518  N   PHE D 360      16.210   6.785   8.397                  1K74
ATOM   1519  H   PHE D 360      17.156   7.147   8.370                  1K74
ATOM   1520  CA  PHE D 360      15.909   5.803   7.369                  1K74
ATOM   1521  CB  PHE D 360      17.067   5.684   6.379                  1K74
ATOM   1522  CG  PHE D 360      17.351   6.912   5.547                  1K74
ATOM   1523  CD1 PHE D 360      16.586   7.177   4.398                  1K74
ATOM   1524  CE1 PHE D 360      16.836   8.343   3.652                  1K74
ATOM   1525  CZ  PHE D 360      17.729   9.312   4.142                  1K74
ATOM   1526  CE2 PHE D 360      18.457   9.064   5.319                  1K74
ATOM   1527  CD2 PHE D 360      18.287   7.853   6.012                  1K74
ATOM   1528  C   PHE D 360      15.647   4.415   7.946                  1K74
ATOM   1529  O   PHE D 360      14.661   4.010   7.333                  1K74
ATOM   1530  N   GLY D 361      16.408   3.923   8.928                  1K74
ATOM   1531  H   GLY D 361      17.057   4.555   9.377                  1K74
ATOM   1532  CA  GLY D 361      16.130   2.849   9.864                  1K74
ATOM   1533  C   GLY D 361      14.745   2.624  10.456                  1K74
ATOM   1534  O   GLY D 361      14.460   1.465  10.748                  1K74
ATOM   1535  N   ASP D 362      13.931   3.672  10.609                  1K74
ATOM   1536  H   ASP D 362      14.143   4.598  10.256                  1K74
ATOM   1537  CA  ASP D 362      12.685   3.743  11.350                  1K74
ATOM   1538  CB  ASP D 362      12.671   4.955  12.279                  1K74
ATOM   1539  CG  ASP D 362      13.877   4.954  13.207                  1K74
ATOM   1540  OD1 ASP D 362      14.173   6.156  13.373                  1K74
ATOM   1541  OD2 ASP D 362      14.578   4.076  13.751                  1K74
ATOM   1542  C   ASP D 362      11.443   3.855  10.473                  1K74
ATOM   1543  O   ASP D 362      10.266   4.007  10.794                  1K74
ATOM   1544  N   PHE D 363      11.487   3.790   9.138                  1K74
ATOM   1545  H   PHE D 363      12.430   3.633   8.802                  1K74
ATOM   1546  CA  PHE D 363      10.530   3.962   8.062                  1K74
ATOM   1547  CB  PHE D 363      11.150   4.218   6.691                  1K74
ATOM   1548  CG  PHE D 363      11.121   5.718   6.540                  1K74
ATOM   1549  CD1 PHE D 363       9.940   6.413   6.221                  1K74
ATOM   1550  CE1 PHE D 363      10.035   7.798   6.004                  1K74
ATOM   1551  CZ  PHE D 363      11.249   8.475   6.206                  1K74
ATOM   1552  CE2 PHE D 363      12.354   7.716   6.632                  1K74
ATOM   1553  CD2 PHE D 363      12.385   6.314   6.688                  1K74
ATOM   1554  C   PHE D 363       9.695   2.691   7.973                  1K74
ATOM   1555  O   PHE D 363       8.502   2.986   8.021                  1K74
ATOM   1556  N   MET D 364      10.245   1.479   7.852                  1K74
ATOM   1557  H   MET D 364      11.253   1.550   7.898                  1K74
ATOM   1558  CA  MET D 364       9.582   0.202   7.667                  1K74
ATOM   1559  CB  MET D 364      10.621  -0.704   7.006                  1K74
ATOM   1560  CG  MET D 364      10.783  -0.490   5.504                  1K74
ATOM   1561  SD  MET D 364       9.471   0.220   4.478                  1K74
ATOM   1562  CE  MET D 364       8.631  -1.361   4.229                  1K74
ATOM   1563  LP1 MET D 364       9.270   0.795   4.783                  1K74
ATOM   1564  LP2 MET D 364       9.103  -0.343   4.401                  1K74
ATOM   1565  C   MET D 364       9.046  -0.522   8.894                  1K74
ATOM   1566  O   MET D 364       8.046  -1.097   8.470                  1K74
ATOM   1567  N   GLU D 365       9.635  -0.437  10.090                  1K74
ATOM   1568  H   GLU D 365      10.437   0.179  10.096                  1K74
ATOM   1569  CA  GLU D 365       9.098  -0.982  11.323                  1K74
ATOM   1570  CB  GLU D 365       9.964  -0.505  12.488                  1K74
ATOM   1571  CG  GLU D 365      10.149  -1.500  13.630                  1K74
ATOM   1572  CD  GLU D 365      10.325  -2.960  13.220                  1K74
ATOM   1573  OE1 GLU D 365      10.808  -3.831  12.485                  1K74
ATOM   1574  OE2 GLU D 365       9.850  -4.012  13.692                  1K74
ATOM   1575  C   GLU D 365       7.666  -0.622  11.700                  1K74
ATOM   1576  O   GLU D 365       7.315  -1.790  11.848                  1K74
ATOM   1577  N   PRO D 366       7.156   0.614  11.762                  1K74
ATOM   1578  CA  PRO D 366       5.719   0.807  11.839                  1K74
ATOM   1579  CD  PRO D 366       7.668   1.916  11.383                  1K74
ATOM   1580  CG  PRO D 366       6.821   2.926  12.147                  1K74
ATOM   1581  CB  PRO D 366       5.572   2.298  11.536                  1K74
ATOM   1582  C   PRO D 366       4.791   0.027  10.911                  1K74
ATOM   1583  O   PRO D 366       3.716  -0.494  11.205                  1K74
ATOM   1584  N   LYS D 367       5.156  -0.154   9.636                  1K74
ATOM   1585  H   LYS D 367       6.051   0.243   9.374                  1K74
ATOM   1586  CA  LYS D 367       4.599  -0.813   8.468                  1K74
ATOM   1587  CB  LYS D 367       5.208  -0.570   7.088                  1K74
ATOM   1588  CG  LYS D 367       4.836   0.765   6.449                  1K74
ATOM   1589  CD  LYS D 367       5.468   2.011   7.060                  1K74
ATOM   1590  CE  LYS D 367       4.976   3.318   6.445                  1K74
ATOM   1591  NZ  LYS D 367       5.929   4.095   7.252                  1K74
ATOM   1592  HZ1 LYS D 367       6.932   3.986   7.146                  1K74
ATOM   1593  HZ2 LYS D 367       5.750   4.972   6.787                  1K74
ATOM   1594  HZ3 LYS D 367       5.935   4.428   8.206                  1K74
ATOM   1595  C   LYS D 367       4.707  -2.313   8.713                  1K74
ATOM   1596  O   LYS D 367       3.604  -2.769   8.416                  1K74
ATOM   1597  N   PHE D 368       5.750  -3.012   9.167                  1K74
ATOM   1598  H   PHE D 368       6.494  -2.353   9.363                  1K74
ATOM   1599  CA  PHE D 368       5.838  -4.411   9.536                  1K74
ATOM   1600  CB  PHE D 368       7.283  -4.723   9.919                  1K74
ATOM   1601  CG  PHE D 368       8.015  -5.174   8.679                  1K74
ATOM   1602  CD1 PHE D 368       7.667  -6.308   7.923                  1K74
ATOM   1603  CE1 PHE D 368       8.419  -6.612   6.775                  1K74
ATOM   1604  CZ  PHE D 368       9.537  -5.834   6.427                  1K74
ATOM   1605  CE2 PHE D 368       9.879  -4.713   7.205                  1K74
ATOM   1606  CD2 PHE D 368       9.105  -4.360   8.325                  1K74
ATOM   1607  C   PHE D 368       4.911  -4.666  10.717                  1K74
ATOM   1608  O   PHE D 368       4.255  -5.689  10.526                  1K74
ATOM   1609  N   GLU D 369       4.811  -3.882  11.795                  1K74
ATOM   1610  H   GLU D 369       5.423  -3.076  11.738                  1K74
ATOM   1611  CA  GLU D 369       3.848  -3.992  12.875                  1K74
ATOM   1612  CB  GLU D 369       4.119  -2.825  13.820                  1K74
ATOM   1613  CG  GLU D 369       5.376  -2.771  14.685                  1K74
ATOM   1614  CD  GLU D 369       5.570  -1.447  15.413                  1K74
ATOM   1615  OE1 GLU D 369       4.654  -1.267  16.246                  1K74
ATOM   1616  OE2 GLU D 369       6.585  -0.828  15.028                  1K74
ATOM   1617  C   GLU D 369       2.382  -3.941  12.457                  1K74
ATOM   1618  O   GLU D 369       1.733  -4.838  12.994                  1K74
ATOM   1619  N   PHE D 370       1.934  -3.023  11.593                  1K74
ATOM   1620  H   PHE D 370       2.670  -2.394  11.294                  1K74
ATOM   1621  CA  PHE D 370       0.655  -2.961  10.914                  1K74
ATOM   1622  CB  PHE D 370       0.604  -1.753   9.981                  1K74
ATOM   1623  CG  PHE D 370      -0.684  -1.567   9.213                  1K74
ATOM   1624  CD1 PHE D 370      -1.923  -1.478   9.872                  1K74
ATOM   1625  CE1 PHE D 370      -3.111  -1.402   9.124                  1K74
ATOM   1626  CZ  PHE D 370      -3.061  -1.758   7.765                  1K74
ATOM   1627  CE2 PHE D 370      -1.832  -1.897   7.096                  1K74
ATOM   1628  CD2 PHE D 370      -0.639  -1.857   7.838                  1K74
ATOM   1629  C   PHE D 370       0.435  -4.225  10.092                  1K74
ATOM   1630  O   PHE D 370      -0.647  -4.640  10.497                  1K74
ATOM   1631  N   ALA D 371       1.304  -4.664   9.179                  1K74
ATOM   1632  H   ALA D 371       2.168  -4.137   9.166                  1K74
ATOM   1633  CA  ALA D 371       1.263  -5.771   8.248                  1K74
ATOM   1634  CB  ALA D 371       2.449  -6.062   7.338                  1K74
ATOM   1635  C   ALA D 371       1.077  -7.002   9.121                  1K74
ATOM   1636  O   ALA D 371       0.186  -7.615   8.537                  1K74
ATOM   1637  N   VAL D 372       1.634  -7.450  10.249                  1K74
ATOM   1638  H   VAL D 372       2.306  -6.714  10.421                  1K74
ATOM   1639  CA  VAL D 372       1.465  -8.677  11.001                  1K74
ATOM   1640  CB  VAL D 372       2.507  -8.784  12.112                  1K74
ATOM   1641  CG1 VAL D 372       2.626  -9.876  13.168                  1K74
ATOM   1642  CG2 VAL D 372       3.998  -8.886  11.803                  1K74
ATOM   1643  C   VAL D 372       0.051  -8.598  11.559                  1K74
ATOM   1644  O   VAL D 372      -0.534  -9.633  11.244                  1K74
ATOM   1645  N   LYS D 373      -0.466  -7.583  12.255                  1K74
ATOM   1646  H   LYS D 373       0.198  -6.822  12.314                  1K74
ATOM   1647  CA  LYS D 373      -1.824  -7.485  12.755                  1K74
ATOM   1648  CB  LYS D 373      -1.924  -6.170  13.524                  1K74
ATOM   1649  CG  LYS D 373      -1.121  -6.043  14.814                  1K74
ATOM   1650  CD  LYS D 373      -1.268  -4.659  15.437                  1K74
ATOM   1651  CE  LYS D 373      -0.422  -4.481  16.695                  1K74
ATOM   1652  NZ  LYS D 373       1.043  -4.425  16.580                  1K74
ATOM   1653  HZ1 LYS D 373       1.240  -3.618  16.006                  1K74
ATOM   1654  HZ2 LYS D 373       1.477  -4.311  17.485                  1K74
ATOM   1655  HZ3 LYS D 373       1.365  -5.260  16.112                  1K74
ATOM   1656  C   LYS D 373      -2.899  -7.497  11.673                  1K74
ATOM   1657  O   LYS D 373      -3.934  -8.117  11.912                  1K74
ATOM   1658  N   PHE D 374      -2.723  -6.862  10.511                  1K74
ATOM   1659  H   PHE D 374      -1.811  -6.423  10.444                  1K74
ATOM   1660  CA  PHE D 374      -3.549  -6.770   9.323                  1K74
ATOM   1661  CB  PHE D 374      -2.996  -5.762   8.319                  1K74
ATOM   1662  CG  PHE D 374      -4.094  -5.362   7.363                  1K74
ATOM   1663  CD1 PHE D 374      -5.191  -4.569   7.744                  1K74
ATOM   1664  CE1 PHE D 374      -6.190  -4.298   6.792                  1K74
ATOM   1665  CZ  PHE D 374      -6.144  -4.871   5.509                  1K74
ATOM   1666  CE2 PHE D 374      -5.068  -5.715   5.181                  1K74
ATOM   1667  CD2 PHE D 374      -4.045  -5.989   6.105                  1K74
ATOM   1668  C   PHE D 374      -3.569  -8.167   8.713                  1K74
ATOM   1669  O   PHE D 374      -4.677  -8.616   8.425                  1K74
ATOM   1670  N   ASN D 375      -2.542  -8.981   8.458                  1K74
ATOM   1671  H   ASN D 375      -1.713  -8.510   8.804                  1K74
ATOM   1672  CA  ASN D 375      -2.339 -10.314   7.919                  1K74
ATOM   1673  CB  ASN D 375      -0.857 -10.568   7.649                  1K74
ATOM   1674  CG  ASN D 375      -0.432  -9.865   6.368                  1K74
ATOM   1675  OD1 ASN D 375       0.780  -9.773   6.201                  1K74
ATOM   1676  ND2 ASN D 375      -1.168  -9.325   5.393                  1K74
ATOM   1677  HD21ASN D 375      -2.142  -9.345   5.661                  1K74
ATOM   1678  HD22ASN D 375      -0.753  -8.718   4.703                  1K74
ATOM   1679  C   ASN D 375      -2.861 -11.351   8.906                  1K74
ATOM   1680  O   ASN D 375      -3.207 -12.210   8.099                  1K74
ATOM   1681  N   ALA D 376      -2.906 -11.216  10.235                  1K74
ATOM   1682  H   ALA D 376      -2.609 -10.276  10.463                  1K74
ATOM   1683  CA  ALA D 376      -3.724 -12.012  11.132                  1K74
ATOM   1684  CB  ALA D 376      -3.519 -11.386  12.510                  1K74
ATOM   1685  C   ALA D 376      -5.216 -12.039  10.813                  1K74
ATOM   1686  O   ALA D 376      -5.758 -13.064  11.221                  1K74
ATOM   1687  N   LEU D 377      -5.862 -11.072  10.151                  1K74
ATOM   1688  H   LEU D 377      -5.268 -10.340   9.779                  1K74
ATOM   1689  CA  LEU D 377      -7.242 -11.256   9.734                  1K74
ATOM   1690  CB  LEU D 377      -7.510  -9.756   9.608                  1K74
ATOM   1691  CG  LEU D 377      -7.615  -8.546  10.534                  1K74
ATOM   1692  CD1 LEU D 377      -8.104  -7.302   9.799                  1K74
ATOM   1693  CD2 LEU D 377      -8.618  -8.983  11.598                  1K74
ATOM   1694  C   LEU D 377      -7.379 -12.094   8.467                  1K74
ATOM   1695  O   LEU D 377      -8.586 -12.273   8.322                  1K74
ATOM   1696  N   GLU D 378      -6.409 -12.567   7.677                  1K74
ATOM   1697  H   GLU D 378      -5.477 -12.274   7.945                  1K74
ATOM   1698  CA  GLU D 378      -6.349 -13.489   6.556                  1K74
ATOM   1699  CB  GLU D 378      -6.534 -14.836   7.258                  1K74
ATOM   1700  CG  GLU D 378      -5.534 -15.591   8.132                  1K74
ATOM   1701  CD  GLU D 378      -6.100 -16.874   8.724                  1K74
ATOM   1702  OE1 GLU D 378      -6.638 -17.783   8.054                  1K74
ATOM   1703  OE2 GLU D 378      -5.949 -16.879   9.965                  1K74
ATOM   1704  C   GLU D 378      -7.363 -13.327   5.423                  1K74
ATOM   1705  O   GLU D 378      -8.087 -14.100   4.796                  1K74
ATOM   1706  N   LEU D 379      -7.372 -12.039   5.051                  1K74
ATOM   1707  H   LEU D 379      -6.804 -11.319   5.481                  1K74
ATOM   1708  CA  LEU D 379      -8.210 -11.432   4.028                  1K74
ATOM   1709  CB  LEU D 379      -8.375  -9.924   3.841                  1K74
ATOM   1710  CG  LEU D 379      -9.178  -9.147   4.881                  1K74
ATOM   1711  CD1 LEU D 379      -8.823  -9.061   6.361                  1K74
ATOM   1712  CD2 LEU D 379      -9.268  -7.658   4.567                  1K74
ATOM   1713  C   LEU D 379      -7.749 -11.870   2.641                  1K74
ATOM   1714  O   LEU D 379      -6.533 -11.844   2.438                  1K74
ATOM   1715  N   ASP D 380      -8.439 -12.291   1.581                  1K74
ATOM   1716  H   ASP D 380      -9.411 -12.122   1.834                  1K74
ATOM   1717  CA  ASP D 380      -8.026 -12.554   0.216                  1K74
ATOM   1718  CB  ASP D 380      -9.044 -13.645  -0.096                  1K74
ATOM   1719  CG  ASP D 380     -10.546 -13.715  -0.345                  1K74
ATOM   1720  OD1 ASP D 380     -10.930 -12.545  -0.583                  1K74
ATOM   1721  OD2 ASP D 380     -10.832 -14.919  -0.223                  1K74
ATOM   1722  C   ASP D 380      -8.206 -11.219  -0.497                  1K74
ATOM   1723  O   ASP D 380      -8.561 -10.099  -0.132                  1K74
ATOM   1724  N   ASP D 381      -7.918 -11.248  -1.801                  1K74
ATOM   1725  H   ASP D 381      -7.506 -12.121  -2.110                  1K74
ATOM   1726  CA  ASP D 381      -8.054 -10.276  -2.871                  1K74
ATOM   1727  CB  ASP D 381      -7.474 -10.805  -4.180                  1K74
ATOM   1728  CG  ASP D 381      -5.954 -10.827  -4.142                  1K74
ATOM   1729  OD1 ASP D 381      -5.059  -9.955  -4.101                  1K74
ATOM   1730  OD2 ASP D 381      -5.204 -11.826  -4.142                  1K74
ATOM   1731  C   ASP D 381      -9.491  -9.871  -3.181                  1K74
ATOM   1732  O   ASP D 381      -9.404  -8.660  -3.368                  1K74
ATOM   1733  N   SER D 382     -10.507 -10.739  -3.191                  1K74
ATOM   1734  H   SER D 382     -10.306 -11.633  -2.758                  1K74
ATOM   1735  CA  SER D 382     -11.877 -10.276  -3.280                  1K74
ATOM   1736  CB  SER D 382     -12.752 -11.501  -3.528                  1K74
ATOM   1737  OG  SER D 382     -13.280 -12.575  -2.756                  1K74
ATOM   1738  HG  SER D 382     -13.206 -13.365  -2.251                  1K74
ATOM   1739  C   SER D 382     -12.367  -9.571  -2.022                  1K74
ATOM   1740  O   SER D 382     -13.274  -8.747  -2.118                  1K74
ATOM   1741  N   ASP D 383     -11.954  -9.668  -0.757                  1K74
ATOM   1742  H   ASP D 383     -11.269 -10.418  -0.721                  1K74
ATOM   1743  CA  ASP D 383     -12.134  -9.031   0.535                  1K74
ATOM   1744  CB  ASP D 383     -11.554  -9.744   1.755                  1K74
ATOM   1745  CG  ASP D 383     -12.131 -11.113   2.080                  1K74
ATOM   1746  OD1 ASP D 383     -13.316 -11.493   1.917                  1K74
ATOM   1747  OD2 ASP D 383     -10.996 -11.423   2.477                  1K74
ATOM   1748  C   ASP D 383     -11.439  -7.688   0.340                  1K74
ATOM   1749  O   ASP D 383     -12.232  -6.748   0.407                  1K74
ATOM   1750  N   LEU D 384     -10.141  -7.478   0.102                  1K74
ATOM   1751  H   LEU D 384      -9.732  -8.406   0.054                  1K74
ATOM   1752  CA  LEU D 384      -9.273  -6.347  -0.167                  1K74
ATOM   1753  CB  LEU D 384      -7.879  -6.828  -0.567                  1K74
ATOM   1754  CG  LEU D 384      -7.094  -7.526   0.541                  1K74
ATOM   1755  CD1 LEU D 384      -5.842  -8.064  -0.146                  1K74
ATOM   1756  CD2 LEU D 384      -6.662  -6.673   1.730                  1K74
ATOM   1757  C   LEU D 384      -9.860  -5.516  -1.300                  1K74
ATOM   1758  O   LEU D 384      -9.649  -4.388  -0.858                  1K74
ATOM   1759  N   ALA D 385     -10.445  -5.925  -2.430                  1K74
ATOM   1760  H   ALA D 385     -10.391  -6.937  -2.409                  1K74
ATOM   1761  CA  ALA D 385     -11.097  -5.202  -3.507                  1K74
ATOM   1762  CB  ALA D 385     -11.745  -6.144  -4.520                  1K74
ATOM   1763  C   ALA D 385     -12.139  -4.340  -2.798                  1K74
ATOM   1764  O   ALA D 385     -12.036  -3.130  -2.984                  1K74
ATOM   1765  N   ILE D 386     -13.151  -4.623  -1.974                  1K74
ATOM   1766  H   ILE D 386     -12.960  -5.596  -1.755                  1K74
ATOM   1767  CA  ILE D 386     -14.276  -3.960  -1.340                  1K74
ATOM   1768  CB  ILE D 386     -15.396  -4.780  -0.704                  1K74
ATOM   1769  CG2 ILE D 386     -16.576  -3.855  -0.423                  1K74
ATOM   1770  CG1 ILE D 386     -15.925  -5.920  -1.566                  1K74
ATOM   1771  CD  ILE D 386     -16.712  -7.169  -1.209                  1K74
ATOM   1772  C   ILE D 386     -13.494  -3.177  -0.291                  1K74
ATOM   1773  O   ILE D 386     -13.892  -2.040  -0.544                  1K74
ATOM   1774  N   PHE D 387     -12.609  -3.515   0.652                  1K74
ATOM   1775  H   PHE D 387     -12.427  -4.494   0.472                  1K74
ATOM   1776  CA  PHE D 387     -11.985  -2.668   1.649                  1K74
ATOM   1777  CB  PHE D 387     -10.952  -3.515   2.391                  1K74
ATOM   1778  CG  PHE D 387     -10.288  -2.878   3.590                  1K74
ATOM   1779  CD1 PHE D 387     -11.055  -2.196   4.551                  1K74
ATOM   1780  CE1 PHE D 387     -10.422  -1.484   5.585                  1K74
ATOM   1781  CZ  PHE D 387      -9.021  -1.373   5.596                  1K74
ATOM   1782  CE2 PHE D 387      -8.266  -1.989   4.581                  1K74
ATOM   1783  CD2 PHE D 387      -8.907  -2.627   3.504                  1K74
ATOM   1784  C   PHE D 387     -11.301  -1.459   1.019                  1K74
ATOM   1785  O   PHE D 387     -11.657  -0.439   1.605                  1K74
ATOM   1786  N   ILE D 388     -10.468  -1.508  -0.024                  1K74
ATOM   1787  H   ILE D 388     -10.402  -2.467  -0.351                  1K74
ATOM   1788  CA  ILE D 388      -9.796  -0.521  -0.849                  1K74
ATOM   1789  CB  ILE D 388      -9.013  -0.978  -2.077                  1K74
ATOM   1790  CG2 ILE D 388      -8.407  -0.146  -3.205                  1K74
ATOM   1791  CG1 ILE D 388      -7.722  -1.740  -1.784                  1K74
ATOM   1792  CD  ILE D 388      -6.842  -2.904  -2.208                  1K74
ATOM   1793  C   ILE D 388     -10.917   0.390  -1.331                  1K74
ATOM   1794  O   ILE D 388     -10.543   1.509  -0.989                  1K74
ATOM   1795  N   ALA D 389     -12.054   0.087  -1.962                  1K74
ATOM   1796  H   ALA D 389     -12.117  -0.921  -1.893                  1K74
ATOM   1797  CA  ALA D 389     -13.081   0.986  -2.456                  1K74
ATOM   1798  CB  ALA D 389     -14.139   0.098  -3.108                  1K74
ATOM   1799  C   ALA D 389     -13.652   1.782  -1.289                  1K74
ATOM   1800  O   ALA D 389     -13.831   2.972  -1.545                  1K74
ATOM   1801  N   VAL D 390     -13.927   1.328  -0.063                  1K74
ATOM   1802  H   VAL D 390     -13.580   0.380   0.041                  1K74
ATOM   1803  CA  VAL D 390     -14.412   1.857   1.197                  1K74
ATOM   1804  CB  VAL D 390     -14.584   0.844   2.324                  1K74
ATOM   1805  CG1 VAL D 390     -14.975   1.084   3.776                  1K74
ATOM   1806  CG2 VAL D 390     -15.618  -0.271   2.198                  1K74
ATOM   1807  C   VAL D 390     -13.333   2.874   1.549                  1K74
ATOM   1808  O   VAL D 390     -13.950   3.916   1.753                  1K74
ATOM   1809  N   ILE D 391     -12.003   2.795   1.634                  1K74
ATOM   1810  H   ILE D 391     -11.840   1.854   1.295                  1K74
ATOM   1811  CA  ILE D 391     -10.937   3.742   1.907                  1K74
ATOM   1812  CB  ILE D 391      -9.505   3.214   1.825                  1K74
ATOM   1813  CG2 ILE D 391      -8.220   4.023   1.999                  1K74
ATOM   1814  CG1 ILE D 391      -9.134   2.126   2.829                  1K74
ATOM   1815  CD  ILE D 391      -8.213   0.939   3.059                  1K74
ATOM   1816  C   ILE D 391     -11.042   4.875   0.892                  1K74
ATOM   1817  O   ILE D 391     -10.937   5.905   1.556                  1K74
ATOM   1818  N   ILE D 392     -11.207   4.698  -0.423                  1K74
ATOM   1819  H   ILE D 392     -11.360   3.722  -0.644                  1K74
ATOM   1820  CA  ILE D 392     -11.287   5.761  -1.408                  1K74
ATOM   1821  CB  ILE D 392     -11.385   5.352  -2.878                  1K74
ATOM   1822  CG2 ILE D 392     -11.473   6.306  -4.069                  1K74
ATOM   1823  CG1 ILE D 392     -10.226   4.517  -3.422                  1K74
ATOM   1824  CD  ILE D 392      -9.766   3.432  -4.388                  1K74
ATOM   1825  C   ILE D 392     -12.528   6.595  -1.101                  1K74
ATOM   1826  O   ILE D 392     -12.348   7.811  -1.046                  1K74
ATOM   1827  N   LEU D 393     -13.741   6.074  -0.891                  1K74
ATOM   1828  H   LEU D 393     -13.676   5.065  -0.863                  1K74
ATOM   1829  CA  LEU D 393     -14.949   6.831  -0.624                  1K74
ATOM   1830  CB  LEU D 393     -15.959   5.848  -1.216                  1K74
ATOM   1831  CG  LEU D 393     -16.451   5.892  -2.662                  1K74
ATOM   1832  CD1 LEU D 393     -16.978   7.261  -3.089                  1K74
ATOM   1833  CD2 LEU D 393     -15.501   5.570  -3.812                  1K74
ATOM   1834  C   LEU D 393     -15.227   7.175   0.834                  1K74
ATOM   1835  O   LEU D 393     -16.186   6.982   1.578                  1K74
ATOM   1836  N   SER D 394     -14.249   7.856   1.440                  1K74
ATOM   1837  H   SER D 394     -13.416   8.114   0.923                  1K74
ATOM   1838  CA  SER D 394     -14.151   8.381   2.790                  1K74
ATOM   1839  CB  SER D 394     -12.782   8.410   3.467                  1K74
ATOM   1840  OG  SER D 394     -12.456   7.078   3.850                  1K74
ATOM   1841  HG  SER D 394     -11.535   6.999   4.100                  1K74
ATOM   1842  C   SER D 394     -14.670   9.812   2.697                  1K74
ATOM   1843  O   SER D 394     -14.013  10.712   2.174                  1K74
ATOM   1844  N   GLY D 395     -15.877  10.005   3.238                  1K74
ATOM   1845  H   GLY D 395     -16.397   9.304   3.748                  1K74
ATOM   1846  CA  GLY D 395     -16.695  11.151   3.589                  1K74
ATOM   1847  C   GLY D 395     -16.145  12.314   4.408                  1K74
ATOM   1848  O   GLY D 395     -16.512  13.487   4.447                  1K74
ATOM   1849  N   ASP D 396     -15.097  12.068   5.201                  1K74
ATOM   1850  H   ASP D 396     -14.563  11.216   5.067                  1K74
ATOM   1851  CA  ASP D 396     -14.356  12.838   6.184                  1K74
ATOM   1852  CB  ASP D 396     -14.094  11.833   7.304                  1K74
ATOM   1853  CG  ASP D 396     -12.987  10.790   7.300                  1K74
ATOM   1854  OD1 ASP D 396     -12.543  10.129   6.336                  1K74
ATOM   1855  OD2 ASP D 396     -12.325  10.440   8.301                  1K74
ATOM   1856  C   ASP D 396     -13.025  13.487   5.821                  1K74
ATOM   1857  O   ASP D 396     -12.226  14.116   6.514                  1K74
ATOM   1858  N   ARG D 397     -12.556  13.442   4.570                  1K74
ATOM   1859  H   ARG D 397     -13.205  13.071   3.885                  1K74
ATOM   1860  CA  ARG D 397     -11.412  13.949   3.835                  1K74
ATOM   1861  CB  ARG D 397     -11.101  13.553   2.394                  1K74
ATOM   1862  CG  ARG D 397     -11.028  12.058   2.101                  1K74
ATOM   1863  CD  ARG D 397     -10.132  11.260   3.042                  1K74
ATOM   1864  NE  ARG D 397      -9.605   9.916   2.807                  1K74
ATOM   1865  HE  ARG D 397     -10.261   9.658   2.084                  1K74
ATOM   1866  CZ  ARG D 397      -8.899   9.096   3.600                  1K74
ATOM   1867  NH1 ARG D 397      -8.463   9.391   4.829                  1K74
ATOM   1868  HH11ARG D 397      -8.373  10.381   4.995                  1K74
ATOM   1869  HH12ARG D 397      -7.729   8.728   5.075                  1K74
ATOM   1870  NH2 ARG D 397      -8.713   7.940   2.951                  1K74
ATOM   1871  HH21ARG D 397      -9.252   7.452   2.250                  1K74
ATOM   1872  HH22ARG D 397      -8.309   7.206   3.526                  1K74
ATOM   1873  C   ARG D 397     -11.554  15.469   3.800                  1K74
ATOM   1874  O   ARG D 397     -12.578  15.993   3.362                  1K74
ATOM   1875  N   PRO D 398     -10.491  16.106   4.306                  1K74
ATOM   1876  CA  PRO D 398     -10.345  17.551   4.290                  1K74
ATOM   1877  CD  PRO D 398      -9.191  15.786   4.866                  1K74
ATOM   1878  CG  PRO D 398      -8.589  16.833   5.797                  1K74
ATOM   1879  CB  PRO D 398      -8.969  17.943   4.824                  1K74
ATOM   1880  C   PRO D 398     -10.478  18.227   2.928                  1K74
ATOM   1881  O   PRO D 398      -9.799  17.764   2.013                  1K74
ATOM   1882  N   GLY D 399     -11.322  19.259   2.830                  1K74
ATOM   1883  H   GLY D 399     -11.841  19.625   3.617                  1K74
ATOM   1884  CA  GLY D 399     -11.810  20.026   1.700                  1K74
ATOM   1885  C   GLY D 399     -12.767  19.329   0.744                  1K74
ATOM   1886  O   GLY D 399     -12.705  19.989  -0.290                  1K74
ATOM   1887  N   LEU D 400     -13.507  18.252   1.016                  1K74
ATOM   1888  H   LEU D 400     -13.288  17.909   1.942                  1K74
ATOM   1889  CA  LEU D 400     -14.614  17.753   0.223                  1K74
ATOM   1890  CB  LEU D 400     -15.121  16.456   0.852                  1K74
ATOM   1891  CG  LEU D 400     -14.172  15.263   0.775                  1K74
ATOM   1892  CD1 LEU D 400     -14.797  14.090   1.524                  1K74
ATOM   1893  CD2 LEU D 400     -13.830  14.743  -0.618                  1K74
ATOM   1894  C   LEU D 400     -15.744  18.775   0.172                  1K74
ATOM   1895  O   LEU D 400     -16.186  19.392   1.140                  1K74
ATOM   1896  N   LEU D 401     -16.254  19.002  -1.039                  1K74
ATOM   1897  H   LEU D 401     -15.865  18.401  -1.767                  1K74
ATOM   1898  CA  LEU D 401     -17.334  19.849  -1.505                  1K74
ATOM   1899  CB  LEU D 401     -17.145  20.177  -2.985                  1K74
ATOM   1900  CG  LEU D 401     -15.902  20.987  -3.346                  1K74
ATOM   1901  CD1 LEU D 401     -16.079  21.427  -4.795                  1K74
ATOM   1902  CD2 LEU D 401     -15.494  22.261  -2.611                  1K74
ATOM   1903  C   LEU D 401     -18.630  19.081  -1.281                  1K74
ATOM   1904  O   LEU D 401     -19.357  19.842  -0.647                  1K74
ATOM   1905  N   ASN D 402     -18.923  17.843  -1.685                  1K74
ATOM   1906  H   ASN D 402     -18.097  17.501  -2.164                  1K74
ATOM   1907  CA  ASN D 402     -20.207  17.203  -1.477                  1K74
ATOM   1908  CB  ASN D 402     -20.873  17.089  -2.849                  1K74
ATOM   1909  CG  ASN D 402     -21.114  18.319  -3.712                  1K74
ATOM   1910  OD1 ASN D 402     -21.781  19.239  -3.244                  1K74
ATOM   1911  ND2 ASN D 402     -20.577  18.312  -4.934                  1K74
ATOM   1912  HD21ASN D 402     -20.070  17.491  -5.228                  1K74
ATOM   1913  HD22ASN D 402     -20.692  19.114  -5.535                  1K74
ATOM   1914  C   ASN D 402     -19.971  15.839  -0.839                  1K74
ATOM   1915  O   ASN D 402     -19.585  14.873  -1.496                  1K74
ATOM   1916  N   VAL D 403     -20.276  15.983   0.454                  1K74
ATOM   1917  H   VAL D 403     -20.513  16.833   0.949                  1K74
ATOM   1918  CA  VAL D 403     -20.005  14.834   1.303                  1K74
ATOM   1919  CB  VAL D 403     -19.888  15.042   2.812                  1K74
ATOM   1920  CG1 VAL D 403     -19.691  14.347   4.153                  1K74
ATOM   1921  CG2 VAL D 403     -18.753  15.929   3.313                  1K74
ATOM   1922  C   VAL D 403     -21.095  13.778   1.152                  1K74
ATOM   1923  O   VAL D 403     -20.443  12.760   0.924                  1K74
ATOM   1924  N   LYS D 404     -22.422  13.920   1.230                  1K74
ATOM   1925  H   LYS D 404     -22.549  14.921   1.297                  1K74
ATOM   1926  CA  LYS D 404     -23.445  12.906   1.049                  1K74
ATOM   1927  CB  LYS D 404     -24.726  13.730   0.962                  1K74
ATOM   1928  CG  LYS D 404     -26.015  12.948   0.734                  1K74
ATOM   1929  CD  LYS D 404     -27.440  13.444   0.528                  1K74
ATOM   1930  CE  LYS D 404     -28.302  12.188   0.498                  1K74
ATOM   1931  NZ  LYS D 404     -28.348  11.193   1.579                  1K74
ATOM   1932  HZ1 LYS D 404     -28.385  11.651   2.474                  1K74
ATOM   1933  HZ2 LYS D 404     -28.964  10.435   1.330                  1K74
ATOM   1934  HZ3 LYS D 404     -27.511  10.646   1.373                  1K74
ATOM   1935  C   LYS D 404     -23.269  12.066  -0.209                  1K74
ATOM   1936  O   LYS D 404     -23.449  11.046   0.450                  1K74
ATOM   1937  N   PRO D 405     -23.018  12.430  -1.470                  1K74
ATOM   1938  CA  PRO D 405     -22.761  11.442  -2.501                  1K74
ATOM   1939  CD  PRO D 405     -22.711  13.706  -2.085                  1K74
ATOM   1940  CG  PRO D 405     -22.992  13.696  -3.582                  1K74
ATOM   1941  CB  PRO D 405     -22.367  12.309  -3.695                  1K74
ATOM   1942  C   PRO D 405     -21.666  10.432  -2.175                  1K74
ATOM   1943  O   PRO D 405     -21.996   9.281  -2.452                  1K74
ATOM   1944  N   ILE D 406     -20.507  10.809  -1.628                  1K74
ATOM   1945  H   ILE D 406     -20.506  11.806  -1.446                  1K74
ATOM   1946  CA  ILE D 406     -19.408   9.977  -1.172                  1K74
ATOM   1947  CB  ILE D 406     -18.220  10.782  -0.646                  1K74
ATOM   1948  CG2 ILE D 406     -16.925  10.129  -0.168                  1K74
ATOM   1949  CG1 ILE D 406     -17.593  11.789  -1.607                  1K74
ATOM   1950  CD  ILE D 406     -16.932  13.161  -1.590                  1K74
ATOM   1951  C   ILE D 406     -19.954   9.092  -0.057                  1K74
ATOM   1952  O   ILE D 406     -19.650   7.931  -0.319                  1K74
ATOM   1953  N   GLU D 407     -20.651   9.508   1.003                  1K74
ATOM   1954  H   GLU D 407     -20.847  10.501   0.990                  1K74
ATOM   1955  CA  GLU D 407     -21.164   8.741   2.124                  1K74
ATOM   1956  CB  GLU D 407     -21.852   9.632   3.153                  1K74
ATOM   1957  CG  GLU D 407     -20.877  10.688   3.665                  1K74
ATOM   1958  CD  GLU D 407     -21.173  11.084   5.100                  1K74
ATOM   1959  OE1 GLU D 407     -22.294  11.406   5.547                  1K74
ATOM   1960  OE2 GLU D 407     -20.143  11.070   5.806                  1K74
ATOM   1961  C   GLU D 407     -22.177   7.712   1.633                  1K74
ATOM   1962  O   GLU D 407     -21.851   6.663   2.183                  1K74
ATOM   1963  N   ASP D 408     -23.152   8.000   0.766                  1K74
ATOM   1964  H   ASP D 408     -23.116   8.978   0.504                  1K74
ATOM   1965  CA  ASP D 408     -24.117   7.072   0.208                  1K74
ATOM   1966  CB  ASP D 408     -24.996   7.902  -0.726                  1K74
ATOM   1967  CG  ASP D 408     -25.981   8.815   0.001                  1K74
ATOM   1968  OD1 ASP D 408     -26.567   9.221   1.013                  1K74
ATOM   1969  OD2 ASP D 408     -26.697   9.725  -0.460                  1K74
ATOM   1970  C   ASP D 408     -23.412   5.952  -0.551                  1K74
ATOM   1971  O   ASP D 408     -23.938   4.887  -0.229                  1K74
ATOM   1972  N   ILE D 409     -22.394   6.180  -1.388                  1K74
ATOM   1973  H   ILE D 409     -22.211   7.174  -1.446                  1K74
ATOM   1974  CA  ILE D 409     -21.596   5.152  -2.031                  1K74
ATOM   1975  CB  ILE D 409     -20.536   5.568  -3.051                  1K74
ATOM   1976  CG2 ILE D 409     -19.627   4.658  -3.876                  1K74
ATOM   1977  CG1 ILE D 409     -21.028   6.377  -4.250                  1K74
ATOM   1978  CD  ILE D 409     -20.696   7.475  -5.252                  1K74
ATOM   1979  C   ILE D 409     -20.857   4.393  -0.935                  1K74
ATOM   1980  O   ILE D 409     -21.117   3.214  -1.176                  1K74
ATOM   1981  N   GLN D 410     -20.117   4.909   0.052                  1K74
ATOM   1982  H   GLN D 410     -20.307   5.905   0.075                  1K74
ATOM   1983  CA  GLN D 410     -19.403   4.199   1.096                  1K74
ATOM   1984  CB  GLN D 410     -18.736   5.183   2.049                  1K74
ATOM   1985  CG  GLN D 410     -17.652   4.291   2.649                  1K74
ATOM   1986  CD  GLN D 410     -17.193   5.062   3.874                  1K74
ATOM   1987  OE1 GLN D 410     -17.449   5.757   4.852                  1K74
ATOM   1988  NE2 GLN D 410     -15.869   4.901   3.830                  1K74
ATOM   1989  HE21GLN D 410     -15.256   4.472   3.146                  1K74
ATOM   1990  HE22GLN D 410     -15.206   5.427   4.385                  1K74
ATOM   1991  C   GLN D 410     -20.466   3.379   1.815                  1K74
ATOM   1992  O   GLN D 410     -19.950   2.268   1.927                  1K74
ATOM   1993  N   ASP D 411     -21.696   3.667   2.246                  1K74
ATOM   1994  H   ASP D 411     -21.893   4.627   1.987                  1K74
ATOM   1995  CA  ASP D 411     -22.709   2.877   2.923                  1K74
ATOM   1996  CB  ASP D 411     -23.979   3.711   3.098                  1K74
ATOM   1997  CG  ASP D 411     -23.779   4.699   4.242                  1K74
ATOM   1998  OD1 ASP D 411     -22.900   4.704   5.133                  1K74
ATOM   1999  OD2 ASP D 411     -24.646   5.600   4.239                  1K74
ATOM   2000  C   ASP D 411     -22.991   1.633   2.086                  1K74
ATOM   2001  O   ASP D 411     -22.984   0.598   2.753                  1K74
ATOM   2002  N   ASN D 412     -23.199   1.606   0.765                  1K74
ATOM   2003  H   ASN D 412     -23.122   2.555   0.416                  1K74
ATOM   2004  CA  ASN D 412     -23.408   0.480  -0.126                  1K74
ATOM   2005  CB  ASN D 412     -23.798   0.930  -1.531                  1K74
ATOM   2006  CG  ASN D 412     -25.194   1.534  -1.560                  1K74
ATOM   2007  OD1 ASN D 412     -26.129   1.315  -0.793                  1K74
ATOM   2008  ND2 ASN D 412     -25.448   2.414  -2.528                  1K74
ATOM   2009  HD21ASN D 412     -24.648   2.742  -3.050                  1K74
ATOM   2010  HD22ASN D 412     -26.270   3.000  -2.483                  1K74
ATOM   2011  C   ASN D 412     -22.120  -0.329  -0.209                  1K74
ATOM   2012  O   ASN D 412     -22.423  -1.515  -0.099                  1K74
ATOM   2013  N   LEU D 413     -20.859   0.087  -0.351                  1K74
ATOM   2014  H   LEU D 413     -20.876   1.101  -0.330                  1K74
ATOM   2015  CA  LEU D 413     -19.535  -0.504  -0.289                  1K74
ATOM   2016  CB  LEU D 413     -18.377   0.472  -0.492                  1K74
ATOM   2017  CG  LEU D 413     -18.352   1.045  -1.907                  1K74
ATOM   2018  CD1 LEU D 413     -17.280   2.129  -1.862                  1K74
ATOM   2019  CD2 LEU D 413     -18.021   0.098  -3.058                  1K74
ATOM   2020  C   LEU D 413     -19.423  -1.123   1.099                  1K74
ATOM   2021  O   LEU D 413     -18.999  -2.263   0.925                  1K74
ATOM   2022  N   LEU D 414     -19.700  -0.661   2.321                  1K74
ATOM   2023  H   LEU D 414     -20.040   0.273   2.116                  1K74
ATOM   2024  CA  LEU D 414     -19.667  -1.153   3.686                  1K74
ATOM   2025  CB  LEU D 414     -20.110  -0.012   4.600                  1K74
ATOM   2026  CG  LEU D 414     -19.006   1.023   4.802                  1K74
ATOM   2027  CD1 LEU D 414     -19.642   2.207   5.521                  1K74
ATOM   2028  CD2 LEU D 414     -17.835   0.514   5.637                  1K74
ATOM   2029  C   LEU D 414     -20.608  -2.348   3.781                  1K74
ATOM   2030  O   LEU D 414     -20.006  -3.267   4.330                  1K74
ATOM   2031  N   GLN D 415     -21.853  -2.316   3.297                  1K74
ATOM   2032  H   GLN D 415     -22.089  -1.421   2.884                  1K74
ATOM   2033  CA  GLN D 415     -22.717  -3.480   3.230                  1K74
ATOM   2034  CB  GLN D 415     -23.967  -2.749   2.756                  1K74
ATOM   2035  CG  GLN D 415     -24.796  -1.950   3.756                  1K74
ATOM   2036  CD  GLN D 415     -26.170  -1.502   3.286                  1K74
ATOM   2037  OE1 GLN D 415     -26.673  -0.385   3.372                  1K74
ATOM   2038  NE2 GLN D 415     -26.981  -2.383   2.696                  1K74
ATOM   2039  HE21GLN D 415     -26.537  -3.281   2.572                  1K74
ATOM   2040  HE22GLN D 415     -27.931  -2.101   2.516                  1K74
ATOM   2041  C   GLN D 415     -22.275  -4.591   2.285                  1K74
ATOM   2042  O   GLN D 415     -22.564  -5.670   2.798                  1K74
ATOM   2043  N   ALA D 416     -21.668  -4.328   1.122                  1K74
ATOM   2044  H   ALA D 416     -21.618  -3.321   1.022                  1K74
ATOM   2045  CA  ALA D 416     -21.091  -5.268   0.176                  1K74
ATOM   2046  CB  ALA D 416     -20.610  -4.578  -1.100                  1K74
ATOM   2047  C   ALA D 416     -19.947  -5.880   0.980                  1K74
ATOM   2048  O   ALA D 416     -20.185  -7.087   0.944                  1K74
ATOM   2049  N   LEU D 417     -18.960  -5.236   1.611                  1K74
ATOM   2050  H   LEU D 417     -19.139  -4.239   1.581                  1K74
ATOM   2051  CA  LEU D 417     -17.876  -5.678   2.464                  1K74
ATOM   2052  CB  LEU D 417     -17.054  -4.540   3.066                  1K74
ATOM   2053  CG  LEU D 417     -15.818  -4.895   3.887                  1K74
ATOM   2054  CD1 LEU D 417     -14.728  -5.653   3.135                  1K74
ATOM   2055  CD2 LEU D 417     -15.286  -3.538   4.338                  1K74
ATOM   2056  C   LEU D 417     -18.439  -6.489   3.622                  1K74
ATOM   2057  O   LEU D 417     -17.869  -7.579   3.666                  1K74
ATOM   2058  N   GLU D 418     -19.397  -6.166   4.494                  1K74
ATOM   2059  H   GLU D 418     -19.709  -5.247   4.199                  1K74
ATOM   2060  CA  GLU D 418     -19.957  -6.957   5.574                  1K74
ATOM   2061  CB  GLU D 418     -21.016  -6.036   6.173                  1K74
ATOM   2062  CG  GLU D 418     -21.804  -6.715   7.292                  1K74
ATOM   2063  CD  GLU D 418     -22.705  -5.673   7.927                  1K74
ATOM   2064  OE1 GLU D 418     -23.327  -4.646   7.586                  1K74
ATOM   2065  OE2 GLU D 418     -22.783  -6.055   9.114                  1K74
ATOM   2066  C   GLU D 418     -20.556  -8.252   5.038                  1K74
ATOM   2067  O   GLU D 418     -20.160  -9.147   5.783                  1K74
ATOM   2068  N   LEU D 419     -21.336  -8.256   3.953                  1K74
ATOM   2069  H   LEU D 419     -21.488  -7.377   3.473                  1K74
ATOM   2070  CA  LEU D 419     -21.859  -9.468   3.356                  1K74
ATOM   2071  CB  LEU D 419     -22.802  -9.215   2.182                  1K74
ATOM   2072  CG  LEU D 419     -23.474 -10.436   1.556                  1K74
ATOM   2073  CD1 LEU D 419     -24.298 -11.388   2.419                  1K74
ATOM   2074  CD2 LEU D 419     -24.443  -9.948   0.485                  1K74
ATOM   2075  C   LEU D 419     -20.718 -10.334   2.838                  1K74
ATOM   2076  O   LEU D 419     -20.933 -11.476   3.241                  1K74
ATOM   2077  N   GLN D 420     -19.695  -9.893   2.101                  1K74
ATOM   2078  H   GLN D 420     -19.797  -8.890   1.989                  1K74
ATOM   2079  CA  GLN D 420     -18.464 -10.522   1.663                  1K74
ATOM   2080  CB  GLN D 420     -17.450  -9.545   1.073                  1K74
ATOM   2081  CG  GLN D 420     -16.080  -9.902   0.503                  1K74
ATOM   2082  CD  GLN D 420     -16.098 -11.105  -0.429                  1K74
ATOM   2083  OE1 GLN D 420     -16.855 -11.521  -1.307                  1K74
ATOM   2084  NE2 GLN D 420     -15.118 -12.003  -0.366                  1K74
ATOM   2085  HE21GLN D 420     -14.321 -11.966   0.260                  1K74
ATOM   2086  HE22GLN D 420     -14.996 -12.720  -1.067                  1K74
ATOM   2087  C   GLN D 420     -17.794 -11.210   2.846                  1K74
ATOM   2088  O   GLN D 420     -17.628 -12.351   2.425                  1K74
ATOM   2089  N   LEU D 421     -17.506 -10.637   4.017                  1K74
ATOM   2090  H   LEU D 421     -17.856  -9.690   3.944                  1K74
ATOM   2091  CA  LEU D 421     -16.806 -11.210   5.150                  1K74
ATOM   2092  CB  LEU D 421     -16.467 -10.038   6.072                  1K74
ATOM   2093  CG  LEU D 421     -15.492  -9.013   5.495                  1K74
ATOM   2094  CD1 LEU D 421     -15.318  -7.962   6.588                  1K74
ATOM   2095  CD2 LEU D 421     -14.092  -9.454   5.074                  1K74
ATOM   2096  C   LEU D 421     -17.745 -12.219   5.798                  1K74
ATOM   2097  O   LEU D 421     -16.934 -13.103   6.058                  1K74
ATOM   2098  N   LYS D 422     -19.067 -12.127   5.977                  1K74
ATOM   2099  H   LYS D 422     -19.418 -11.248   5.618                  1K74
ATOM   2100  CA  LYS D 422     -19.936 -13.178   6.475                  1K74
ATOM   2101  CB  LYS D 422     -21.359 -12.617   6.460                  1K74
ATOM   2102  CG  LYS D 422     -21.660 -11.720   7.659                  1K74
ATOM   2103  CD  LYS D 422     -23.091 -11.206   7.552                  1K74
ATOM   2104  CE  LYS D 422     -23.436 -10.197   8.645                  1K74
ATOM   2105  NZ  LYS D 422     -24.776  -9.609   8.501                  1K74
ATOM   2106  HZ1 LYS D 422     -25.480 -10.334   8.489                  1K74
ATOM   2107  HZ2 LYS D 422     -24.949  -8.940   9.237                  1K74
ATOM   2108  HZ3 LYS D 422     -24.791  -9.120   7.618                  1K74
ATOM   2109  C   LYS D 422     -19.837 -14.429   5.604                  1K74
ATOM   2110  O   LYS D 422     -19.567 -15.357   6.362                  1K74
ATOM   2111  N   LEU D 423     -20.024 -14.353   4.282                  1K74
ATOM   2112  H   LEU D 423     -20.149 -13.407   3.944                  1K74
ATOM   2113  CA  LEU D 423     -19.950 -15.474   3.366                  1K74
ATOM   2114  CB  LEU D 423     -20.425 -14.950   2.010                  1K74
ATOM   2115  CG  LEU D 423     -21.916 -14.638   1.910                  1K74
ATOM   2116  CD1 LEU D 423     -22.146 -14.021   0.535                  1K74
ATOM   2117  CD2 LEU D 423     -22.852 -15.836   2.049                  1K74
ATOM   2118  C   LEU D 423     -18.556 -16.067   3.216                  1K74
ATOM   2119  O   LEU D 423     -18.553 -17.294   3.288                  1K74
ATOM   2120  N   ASN D 424     -17.544 -15.213   3.039                  1K74
ATOM   2121  H   ASN D 424     -17.655 -14.207   3.023                  1K74
ATOM   2122  CA  ASN D 424     -16.145 -15.540   2.863                  1K74
ATOM   2123  CB  ASN D 424     -15.129 -14.483   2.435                  1K74
ATOM   2124  CG  ASN D 424     -14.277 -15.253   1.437                  1K74
ATOM   2125  OD1 ASN D 424     -13.820 -14.353   0.742                  1K74
ATOM   2126  ND2 ASN D 424     -13.888 -16.473   1.070                  1K74
ATOM   2127  HD21ASN D 424     -14.557 -16.965   1.645                  1K74
ATOM   2128  HD22ASN D 424     -13.130 -16.699   0.450                  1K74
ATOM   2129  C   ASN D 424     -15.421 -16.091   4.085                  1K74
ATOM   2130  O   ASN D 424     -14.557 -16.964   4.132                  1K74
ATOM   2131  N   HIS D 425     -15.686 -15.657   5.319                  1K74
ATOM   2132  H   HIS D 425     -16.433 -14.973   5.353                  1K74
ATOM   2133  CA  HIS D 425     -15.136 -15.968   6.625                  1K74
ATOM   2134  CB  HIS D 425     -14.209 -14.784   6.890                  1K74
ATOM   2135  CG  HIS D 425     -12.931 -14.475   6.160                  1K74
ATOM   2136  ND1 HIS D 425     -13.241 -13.507   5.218                  1K74
ATOM   2137  HD1 HIS D 425     -14.079 -13.118   4.811                  1K74
ATOM   2138  CE1 HIS D 425     -12.296 -13.564   4.268                  1K74
ATOM   2139  NE2 HIS D 425     -11.373 -14.318   4.868                  1K74
ATOM   2140  CD2 HIS D 425     -11.688 -15.045   6.013                  1K74
ATOM   2141  C   HIS D 425     -16.234 -16.117   7.673                  1K74
ATOM   2142  O   HIS D 425     -16.475 -15.398   8.642                  1K74
ATOM   2143  N   PRO D 426     -17.005 -17.201   7.514                  1K74
ATOM   2144  CA  PRO D 426     -18.124 -17.621   8.341                  1K74
ATOM   2145  CD  PRO D 426     -17.130 -18.336   6.619                  1K74
ATOM   2146  CG  PRO D 426     -17.616 -19.719   7.041                  1K74
ATOM   2147  CB  PRO D 426     -18.703 -18.884   7.709                  1K74
ATOM   2148  C   PRO D 426     -17.791 -17.930   9.798                  1K74
ATOM   2149  O   PRO D 426     -18.728 -17.699  10.560                  1K74
ATOM   2150  N   GLU D 427     -16.601 -18.379  10.210                  1K74
ATOM   2151  H   GLU D 427     -15.966 -18.436   9.424                  1K74
ATOM   2152  CA  GLU D 427     -16.166 -18.650  11.568                  1K74
ATOM   2153  CB  GLU D 427     -15.338 -19.896  11.254                  1K74
ATOM   2154  CG  GLU D 427     -16.143 -21.187  11.399                  1K74
ATOM   2155  CD  GLU D 427     -15.380 -22.481  11.156                  1K74
ATOM   2156  OE1 GLU D 427     -14.408 -22.734  11.901                  1K74
ATOM   2157  OE2 GLU D 427     -15.777 -23.206  10.219                  1K74
ATOM   2158  C   GLU D 427     -15.390 -17.486  12.176                  1K74
ATOM   2159  O   GLU D 427     -15.073 -17.702  13.345                  1K74
ATOM   2160  N   SER D 428     -15.040 -16.317  11.630                  1K74
ATOM   2161  H   SER D 428     -15.348 -16.253  10.667                  1K74
ATOM   2162  CA  SER D 428     -14.273 -15.239  12.225                  1K74
ATOM   2163  CB  SER D 428     -13.283 -14.658  11.217                  1K74
ATOM   2164  OG  SER D 428     -13.914 -14.199  10.027                  1K74
ATOM   2165  HG  SER D 428     -13.317 -13.738   9.437                  1K74
ATOM   2166  C   SER D 428     -15.331 -14.228  12.651                  1K74
ATOM   2167  O   SER D 428     -16.089 -13.443  12.081                  1K74
ATOM   2168  N   SER D 429     -15.409 -14.240  13.987                  1K74
ATOM   2169  H   SER D 429     -14.853 -14.800  14.621                  1K74
ATOM   2170  CA  SER D 429     -16.193 -13.368  14.841                  1K74
ATOM   2171  CB  SER D 429     -16.361 -13.658  16.330                  1K74
ATOM   2172  OG  SER D 429     -15.130 -13.725  17.046                  1K74
ATOM   2173  HG  SER D 429     -15.428 -13.931  17.933                  1K74
ATOM   2174  C   SER D 429     -15.588 -11.969  14.810                  1K74
ATOM   2175  O   SER D 429     -14.389 -11.691  14.838                  1K74
ATOM   2176  N   GLN D 430     -16.415 -10.919  14.742                  1K74
ATOM   2177  H   GLN D 430     -17.416 -11.050  14.677                  1K74
ATOM   2178  CA  GLN D 430     -16.253  -9.478  14.659                  1K74
ATOM   2179  CB  GLN D 430     -15.818  -9.108  16.081                  1K74
ATOM   2180  CG  GLN D 430     -16.755  -9.001  17.283                  1K74
ATOM   2181  CD  GLN D 430     -18.002  -8.230  16.872                  1K74
ATOM   2182  OE1 GLN D 430     -18.226  -7.077  16.514                  1K74
ATOM   2183  NE2 GLN D 430     -19.057  -9.045  16.937                  1K74
ATOM   2184  HE21GLN D 430     -19.177  -9.977  17.312                  1K74
ATOM   2185  HE22GLN D 430     -19.995  -8.672  16.860                  1K74
ATOM   2186  C   GLN D 430     -15.247  -8.957  13.635                  1K74
ATOM   2187  O   GLN D 430     -14.635  -7.892  13.706                  1K74
ATOM   2188  N   LEU D 431     -14.937  -9.611  12.509                  1K74
ATOM   2189  H   LEU D 431     -15.447 -10.487  12.482                  1K74
ATOM   2190  CA  LEU D 431     -14.041  -9.442  11.377                  1K74
ATOM   2191  CB  LEU D 431     -14.037 -10.590  10.365                  1K74
ATOM   2192  CG  LEU D 431     -13.039 -10.383   9.227                  1K74
ATOM   2193  CD1 LEU D 431     -11.548 -10.471   9.544                  1K74
ATOM   2194  CD2 LEU D 431     -13.233 -11.407   8.116                  1K74
ATOM   2195  C   LEU D 431     -14.515  -8.155  10.707                  1K74
ATOM   2196  O   LEU D 431     -13.380  -7.689  10.632                  1K74
ATOM   2197  N   PHE D 432     -15.754  -7.764  10.391                  1K74
ATOM   2198  H   PHE D 432     -16.292  -8.539  10.751                  1K74
ATOM   2199  CA  PHE D 432     -16.046  -6.420   9.933                  1K74
ATOM   2200  CB  PHE D 432     -17.569  -6.436   9.823                  1K74
ATOM   2201  CG  PHE D 432     -18.150  -5.294   9.023                  1K74
ATOM   2202  CD1 PHE D 432     -17.602  -4.890   7.792                  1K74
ATOM   2203  CE1 PHE D 432     -18.078  -3.731   7.156                  1K74
ATOM   2204  CZ  PHE D 432     -19.105  -2.985   7.761                  1K74
ATOM   2205  CE2 PHE D 432     -19.622  -3.368   9.011                  1K74
ATOM   2206  CD2 PHE D 432     -19.105  -4.495   9.675                  1K74
ATOM   2207  C   PHE D 432     -15.569  -5.318  10.876                  1K74
ATOM   2208  O   PHE D 432     -14.932  -4.450  10.279                  1K74
ATOM   2209  N   ALA D 433     -15.810  -5.338  12.191                  1K74
ATOM   2210  H   ALA D 433     -16.188  -6.227  12.493                  1K74
ATOM   2211  CA  ALA D 433     -15.363  -4.370  13.176                  1K74
ATOM   2212  CB  ALA D 433     -15.956  -4.725  14.537                  1K74
ATOM   2213  C   ALA D 433     -13.840  -4.379  13.270                  1K74
ATOM   2214  O   ALA D 433     -13.306  -3.275  13.357                  1K74
ATOM   2215  N   LYS D 434     -12.990  -5.411  13.252                  1K74
ATOM   2216  H   LYS D 434     -13.536  -6.260  13.145                  1K74
ATOM   2217  CA  LYS D 434     -11.553  -5.622  13.262                  1K74
ATOM   2218  CB  LYS D 434     -11.165  -7.097  13.358                  1K74
ATOM   2219  CG  LYS D 434     -11.451  -7.746  14.709                  1K74
ATOM   2220  CD  LYS D 434     -10.938  -9.182  14.719                  1K74
ATOM   2221  CE  LYS D 434     -11.559 -10.040  15.817                  1K74
ATOM   2222  NZ  LYS D 434     -10.969 -11.387  15.855                  1K74
ATOM   2223  HZ1 LYS D 434      -9.966 -11.402  15.978                  1K74
ATOM   2224  HZ2 LYS D 434     -11.386 -11.946  16.587                  1K74
ATOM   2225  HZ3 LYS D 434     -11.168 -11.837  14.973                  1K74
ATOM   2226  C   LYS D 434     -11.010  -5.036  11.962                  1K74
ATOM   2227  O   LYS D 434      -9.941  -4.486  12.221                  1K74
ATOM   2228  N   LEU D 435     -11.590  -5.084  10.759                  1K74
ATOM   2229  H   LEU D 435     -12.471  -5.574  10.857                  1K74
ATOM   2230  CA  LEU D 435     -11.156  -4.468   9.523                  1K74
ATOM   2231  CB  LEU D 435     -11.889  -5.171   8.381                  1K74
ATOM   2232  CG  LEU D 435     -11.362  -4.714   7.022                  1K74
ATOM   2233  CD1 LEU D 435      -9.889  -4.955   6.699                  1K74
ATOM   2234  CD2 LEU D 435     -12.168  -5.456   5.962                  1K74
ATOM   2235  C   LEU D 435     -11.474  -2.977   9.504                  1K74
ATOM   2236  O   LEU D 435     -10.435  -2.498   9.057                  1K74
ATOM   2237  N   LEU D 436     -12.626  -2.428   9.897                  1K74
ATOM   2238  H   LEU D 436     -13.306  -3.129  10.161                  1K74
ATOM   2239  CA  LEU D 436     -12.814  -0.990   9.959                  1K74
ATOM   2240  CB  LEU D 436     -14.298  -0.819  10.279                  1K74
ATOM   2241  CG  LEU D 436     -15.319  -1.168   9.198                  1K74
ATOM   2242  CD1 LEU D 436     -16.639  -0.496   9.564                  1K74
ATOM   2243  CD2 LEU D 436     -15.175  -0.825   7.718                  1K74
ATOM   2244  C   LEU D 436     -11.947  -0.307  11.011                  1K74
ATOM   2245  O   LEU D 436     -11.656   0.828  10.639                  1K74
ATOM   2246  N   GLN D 437     -11.551  -0.905  12.140                  1K74
ATOM   2247  H   GLN D 437     -11.920  -1.847  12.180                  1K74
ATOM   2248  CA  GLN D 437     -10.511  -0.519  13.076                  1K74
ATOM   2249  CB  GLN D 437     -10.214  -1.624  14.089                  1K74
ATOM   2250  CG  GLN D 437      -9.510  -1.214  15.381                  1K74
ATOM   2251  CD  GLN D 437      -9.822   0.159  15.964                  1K74
ATOM   2252  OE1 GLN D 437      -9.303   1.270  15.979                  1K74
ATOM   2253  NE2 GLN D 437     -10.985   0.109  16.617                  1K74
ATOM   2254  HE21GLN D 437     -11.493  -0.764  16.595                  1K74
ATOM   2255  HE22GLN D 437     -11.284   0.942  17.101                  1K74
ATOM   2256  C   GLN D 437      -9.194  -0.191  12.378                  1K74
ATOM   2257  O   GLN D 437      -8.647   0.866  12.691                  1K74
ATOM   2258  N   LYS D 438      -8.732  -1.038  11.451                  1K74
ATOM   2259  H   LYS D 438      -9.388  -1.755  11.166                  1K74
ATOM   2260  CA  LYS D 438      -7.537  -0.874  10.642                  1K74
ATOM   2261  CB  LYS D 438      -7.369  -2.047   9.676                  1K74
ATOM   2262  CG  LYS D 438      -7.200  -3.455  10.239                  1K74
ATOM   2263  CD  LYS D 438      -6.099  -3.466  11.297                  1K74
ATOM   2264  CE  LYS D 438      -5.925  -4.782  12.046                  1K74
ATOM   2265  NZ  LYS D 438      -4.974  -4.638  13.159                  1K74
ATOM   2266  HZ1 LYS D 438      -5.425  -4.012  13.814                  1K74
ATOM   2267  HZ2 LYS D 438      -4.906  -5.547  13.592                  1K74
ATOM   2268  HZ3 LYS D 438      -4.154  -4.111  12.899                  1K74
ATOM   2269  C   LYS D 438      -7.585   0.414   9.826                  1K74
ATOM   2270  O   LYS D 438      -6.407   0.754   9.734                  1K74
ATOM   2271  N   MET D 439      -8.706   0.989   9.379                  1K74
ATOM   2272  H   MET D 439      -9.559   0.596   9.759                  1K74
ATOM   2273  CA  MET D 439      -8.769   2.286   8.729                  1K74
ATOM   2274  CB  MET D 439     -10.222   2.533   8.334                  1K74
ATOM   2275  CG  MET D 439     -10.535   1.855   7.003                  1K74
ATOM   2276  SD  MET D 439     -12.202   1.891   6.301                  1K74
ATOM   2277  CE  MET D 439     -12.297   3.647   5.876                  1K74
ATOM   2278  LP1 MET D 439     -12.014   2.538   6.252                  1K74
ATOM   2279  LP2 MET D 439     -12.352   1.597   6.894                  1K74
ATOM   2280  C   MET D 439      -8.315   3.473   9.573                  1K74
ATOM   2281  O   MET D 439      -7.828   4.446   9.000                  1K74
ATOM   2282  N   THR D 440      -8.418   3.452  10.905                  1K74
ATOM   2283  H   THR D 440      -8.677   2.627  11.435                  1K74
ATOM   2284  CA  THR D 440      -7.914   4.450  11.831                  1K74
ATOM   2285  CB  THR D 440      -8.584   4.525  13.200                  1K74
ATOM   2286  CG2 THR D 440     -10.020   4.211  13.607                  1K74
ATOM   2287  OG1 THR D 440      -8.277   3.849  14.413                  1K74
ATOM   2288  HG1 THR D 440      -8.408   4.008  15.347                  1K74
ATOM   2289  C   THR D 440      -6.436   4.179  12.090                  1K74
ATOM   2290  O   THR D 440      -5.722   5.169  12.246                  1K74
ATOM   2291  N   ASP D 441      -5.854   2.977  12.147                  1K74
ATOM   2292  H   ASP D 441      -6.543   2.243  12.042                  1K74
ATOM   2293  CA  ASP D 441      -4.481   2.520  12.270                  1K74
ATOM   2294  CB  ASP D 441      -4.414   0.995  12.353                  1K74
ATOM   2295  CG  ASP D 441      -4.960   0.310  13.600                  1K74
ATOM   2296  OD1 ASP D 441      -5.344   0.863  14.652                  1K74
ATOM   2297  OD2 ASP D 441      -5.034  -0.940  13.567                  1K74
ATOM   2298  C   ASP D 441      -3.721   3.025  11.045                  1K74
ATOM   2299  O   ASP D 441      -2.614   3.491  11.314                  1K74
ATOM   2300  N   LEU D 442      -4.217   3.003   9.803                  1K74
ATOM   2301  H   LEU D 442      -5.160   2.634   9.840                  1K74
ATOM   2302  CA  LEU D 442      -3.695   3.580   8.579                  1K74
ATOM   2303  CB  LEU D 442      -4.683   3.249   7.465                  1K74
ATOM   2304  CG  LEU D 442      -4.281   2.170   6.464                  1K74
ATOM   2305  CD1 LEU D 442      -2.915   1.499   6.358                  1K74
ATOM   2306  CD2 LEU D 442      -5.166   0.938   6.622                  1K74
ATOM   2307  C   LEU D 442      -3.557   5.087   8.737                  1K74
ATOM   2308  O   LEU D 442      -2.473   5.345   8.219                  1K74
ATOM   2309  N   ARG D 443      -4.450   5.868   9.350                  1K74
ATOM   2310  H   ARG D 443      -5.162   5.342   9.843                  1K74
ATOM   2311  CA  ARG D 443      -4.249   7.268   9.673                  1K74
ATOM   2312  CB  ARG D 443      -5.397   7.868  10.483                  1K74
ATOM   2313  CG  ARG D 443      -6.736   7.709   9.771                  1K74
ATOM   2314  CD  ARG D 443      -6.707   8.222   8.332                  1K74
ATOM   2315  NE  ARG D 443      -8.073   8.512   7.906                  1K74
ATOM   2316  HE  ARG D 443      -8.702   7.862   8.356                  1K74
ATOM   2317  CZ  ARG D 443      -9.042   9.323   8.344                  1K74
ATOM   2318  NH1 ARG D 443      -9.062  10.185   9.366                  1K74
ATOM   2319  HH11ARG D 443      -8.140  10.117   9.773                  1K74
ATOM   2320  HH12ARG D 443      -9.868  10.678   9.715                  1K74
ATOM   2321  NH2 ARG D 443     -10.079   9.135   7.523                  1K74
ATOM   2322  HH21ARG D 443     -10.534   8.668   6.756                  1K74
ATOM   2323  HH22ARG D 443     -10.956   9.608   7.757                  1K74
ATOM   2324  C   ARG D 443      -2.988   7.514  10.491                  1K74
ATOM   2325  O   ARG D 443      -2.311   8.401   9.974                  1K74
ATOM   2326  N   GLN D 444      -2.721   6.796  11.586                  1K74
ATOM   2327  H   GLN D 444      -3.359   6.022  11.722                  1K74
ATOM   2328  CA  GLN D 444      -1.475   6.881  12.322                  1K74
ATOM   2329  CB  GLN D 444      -1.540   5.912  13.497                  1K74
ATOM   2330  CG  GLN D 444      -0.474   6.268  14.530                  1K74
ATOM   2331  CD  GLN D 444      -1.015   6.223  15.948                  1K74
ATOM   2332  OE1 GLN D 444      -2.057   5.920  16.520                  1K74
ATOM   2333  NE2 GLN D 444      -0.123   6.618  16.859                  1K74
ATOM   2334  HE21GLN D 444       0.833   6.901  16.703                  1K74
ATOM   2335  HE22GLN D 444      -0.424   6.515  17.818                  1K74
ATOM   2336  C   GLN D 444      -0.257   6.512  11.488                  1K74
ATOM   2337  O   GLN D 444       0.603   7.351  11.743                  1K74
ATOM   2338  N   ILE D 445      -0.144   5.481  10.647                  1K74
ATOM   2339  H   ILE D 445      -1.050   5.028  10.635                  1K74
ATOM   2340  CA  ILE D 445       0.987   5.062   9.840                  1K74
ATOM   2341  CB  ILE D 445       0.828   3.771   9.038                  1K74
ATOM   2342  CG2 ILE D 445       1.755   3.137   8.001                  1K74
ATOM   2343  CG1 ILE D 445       0.727   2.613  10.029                  1K74
ATOM   2344  CD  ILE D 445      -0.494   1.718   9.851                  1K74
ATOM   2345  C   ILE D 445       1.169   6.247   8.898                  1K74
ATOM   2346  O   ILE D 445       2.359   6.481   9.088                  1K74
ATOM   2347  N   VAL D 446       0.241   6.812   8.120                  1K74
ATOM   2348  H   VAL D 446      -0.672   6.436   8.344                  1K74
ATOM   2349  CA  VAL D 446       0.485   7.839   7.124                  1K74
ATOM   2350  CB  VAL D 446      -0.763   8.191   6.316                  1K74
ATOM   2351  CG1 VAL D 446      -1.079   9.230   5.247                  1K74
ATOM   2352  CG2 VAL D 446      -1.386   7.134   5.408                  1K74
ATOM   2353  C   VAL D 446       0.982   9.082   7.855                  1K74
ATOM   2354  O   VAL D 446       1.993   9.343   7.207                  1K74
ATOM   2355  N   THR D 447       0.394   9.633   8.919                  1K74
ATOM   2356  H   THR D 447      -0.379   9.116   9.320                  1K74
ATOM   2357  CA  THR D 447       0.820  10.869   9.549                  1K74
ATOM   2358  CB  THR D 447      -0.109  11.281  10.688                  1K74
ATOM   2359  CG2 THR D 447      -1.570  11.635  10.430                  1K74
ATOM   2360  OG1 THR D 447      -0.388  10.422  11.788                  1K74
ATOM   2361  HG1 THR D 447      -0.592  10.784  12.648                  1K74
ATOM   2362  C   THR D 447       2.224  10.663  10.107                  1K74
ATOM   2363  O   THR D 447       2.946  11.606   9.793                  1K74
ATOM   2364  N   GLU D 448       2.599   9.590  10.811                  1K74
ATOM   2365  H   GLU D 448       1.830   8.932  10.887                  1K74
ATOM   2366  CA  GLU D 448       3.926   9.243  11.282                  1K74
ATOM   2367  CB  GLU D 448       3.850   7.894  11.989                  1K74
ATOM   2368  CG  GLU D 448       5.058   7.109  12.490                  1K74
ATOM   2369  CD  GLU D 448       4.631   5.940  13.362                  1K74
ATOM   2370  OE1 GLU D 448       3.588   5.366  13.741                  1K74
ATOM   2371  OE2 GLU D 448       5.756   5.541  13.732                  1K74
ATOM   2372  C   GLU D 448       4.914   9.145  10.125                  1K74
ATOM   2373  O   GLU D 448       5.977   9.721  10.350                  1K74
ATOM   2374  N   HIS D 449       4.628   8.497   8.990                  1K74
ATOM   2375  H   HIS D 449       3.665   8.177   8.973                  1K74
ATOM   2376  CA  HIS D 449       5.406   8.424   7.770                  1K74
ATOM   2377  CB  HIS D 449       4.655   7.613   6.715                  1K74
ATOM   2378  CG  HIS D 449       5.516   7.356   5.506                  1K74
ATOM   2379  ND1 HIS D 449       6.751   6.735   5.404                  1K74
ATOM   2380  HD1 HIS D 449       6.909   6.087   6.162                  1K74
ATOM   2381  CE1 HIS D 449       7.279   6.414   4.209                  1K74
ATOM   2382  NE2 HIS D 449       6.506   7.337   3.636                  1K74
ATOM   2383  CD2 HIS D 449       5.672   8.152   4.397                  1K74
ATOM   2384  C   HIS D 449       5.645   9.842   7.264                  1K74
ATOM   2385  O   HIS D 449       6.847   9.846   7.008                  1K74
ATOM   2386  N   VAL D 450       4.711  10.790   7.157                  1K74
ATOM   2387  H   VAL D 450       3.814  10.437   7.470                  1K74
ATOM   2388  CA  VAL D 450       4.799  12.173   6.732                  1K74
ATOM   2389  CB  VAL D 450       3.546  13.046   6.713                  1K74
ATOM   2390  CG1 VAL D 450       3.054  14.476   6.531                  1K74
ATOM   2391  CG2 VAL D 450       2.580  12.586   5.626                  1K74
ATOM   2392  C   VAL D 450       5.783  12.819   7.700                  1K74
ATOM   2393  O   VAL D 450       6.631  13.431   7.055                  1K74
ATOM   2394  N   GLN D 451       5.745  12.712   9.030                  1K74
ATOM   2395  H   GLN D 451       5.017  12.067   9.312                  1K74
ATOM   2396  CA  GLN D 451       6.643  13.345   9.976                  1K74
ATOM   2397  CB  GLN D 451       6.194  12.981  11.387                  1K74
ATOM   2398  CG  GLN D 451       4.832  13.542  11.785                  1K74
ATOM   2399  CD  GLN D 451       4.411  12.860  13.076                  1K74
ATOM   2400  OE1 GLN D 451       4.554  11.781  13.645                  1K74
ATOM   2401  NE2 GLN D 451       3.684  13.761  13.742                  1K74
ATOM   2402  HE21GLN D 451       3.443  14.696  13.440                  1K74
ATOM   2403  HE22GLN D 451       3.376  13.562  14.684                  1K74
ATOM   2404  C   GLN D 451       8.081  12.883   9.772                  1K74
ATOM   2405  O   GLN D 451       8.818  13.867   9.821                  1K74
ATOM   2406  N   LEU D 452       8.370  11.595   9.562                  1K74
ATOM   2407  H   LEU D 452       7.562  10.985   9.591                  1K74
ATOM   2408  CA  LEU D 452       9.677  11.126   9.144                  1K74
ATOM   2409  CB  LEU D 452       9.596   9.602   9.089                  1K74
ATOM   2410  CG  LEU D 452      10.581   8.944  10.051                  1K74
ATOM   2411  CD1 LEU D 452      10.669   9.235  11.546                  1K74
ATOM   2412  CD2 LEU D 452      10.283   7.450   9.987                  1K74
ATOM   2413  C   LEU D 452      10.237  11.582   7.802                  1K74
ATOM   2414  O   LEU D 452      11.437  11.795   7.962                  1K74
ATOM   2415  N   LEU D 453       9.365  11.681   6.794                  1K74
ATOM   2416  H   LEU D 453       8.386  11.477   6.955                  1K74
ATOM   2417  CA  LEU D 453       9.717  12.415   5.592                  1K74
ATOM   2418  CB  LEU D 453       8.545  12.398   4.613                  1K74
ATOM   2419  CG  LEU D 453       8.421  11.043   3.921                  1K74
ATOM   2420  CD1 LEU D 453       7.335  11.163   2.857                  1K74
ATOM   2421  CD2 LEU D 453       9.551  10.347   3.168                  1K74
ATOM   2422  C   LEU D 453      10.098  13.883   5.754                  1K74
ATOM   2423  O   LEU D 453      10.897  14.418   4.986                  1K74
ATOM   2424  N   GLN D 454       9.616  14.628   6.754                  1K74
ATOM   2425  H   GLN D 454       9.011  14.130   7.397                  1K74
ATOM   2426  CA  GLN D 454      10.108  15.947   7.114                  1K74
ATOM   2427  CB  GLN D 454       9.044  16.633   7.957                  1K74
ATOM   2428  CG  GLN D 454       7.617  16.816   7.452                  1K74
ATOM   2429  CD  GLN D 454       6.593  17.264   8.481                  1K74
ATOM   2430  OE1 GLN D 454       5.582  17.763   7.996                  1K74
ATOM   2431  NE2 GLN D 454       6.722  17.173   9.806                  1K74
ATOM   2432  HE21GLN D 454       7.608  16.800  10.113                  1K74
ATOM   2433  HE22GLN D 454       5.972  17.568  10.353                  1K74
ATOM   2434  C   GLN D 454      11.401  16.004   7.917                  1K74
ATOM   2435  O   GLN D 454      12.041  17.045   7.777                  1K74
ATOM   2436  N   VAL D 455      11.787  14.990   8.697                  1K74
ATOM   2437  H   VAL D 455      11.152  14.208   8.800                  1K74
ATOM   2438  CA  VAL D 455      13.039  14.721   9.381                  1K74
ATOM   2439  CB  VAL D 455      13.165  13.529  10.326                  1K74
ATOM   2440  CG1 VAL D 455      14.356  13.080  11.162                  1K74
ATOM   2441  CG2 VAL D 455      12.200  13.502  11.506                  1K74
ATOM   2442  C   VAL D 455      13.975  14.534   8.194                  1K74
ATOM   2443  O   VAL D 455      14.745  15.415   8.565                  1K74
ATOM   2444  N   ILE D 456      13.884  13.701   7.156                  1K74
ATOM   2445  H   ILE D 456      12.993  13.252   7.317                  1K74
ATOM   2446  CA  ILE D 456      14.728  13.585   5.980                  1K74
ATOM   2447  CB  ILE D 456      14.252  12.651   4.869                  1K74
ATOM   2448  CG2 ILE D 456      14.855  12.497   3.472                  1K74
ATOM   2449  CG1 ILE D 456      14.304  11.188   5.302                  1K74
ATOM   2450  CD  ILE D 456      13.920   9.809   4.780                  1K74
ATOM   2451  C   ILE D 456      14.828  14.987   5.388                  1K74
ATOM   2452  O   ILE D 456      16.023  15.234   5.253                  1K74
ATOM   2453  N   LYS D 457      13.752  15.739   5.127                  1K74
ATOM   2454  H   LYS D 457      12.941  15.303   5.543                  1K74
ATOM   2455  CA  LYS D 457      13.947  17.043   4.525                  1K74
ATOM   2456  CB  LYS D 457      12.469  17.400   4.403                  1K74
ATOM   2457  CG  LYS D 457      12.298  18.514   3.375                  1K74
ATOM   2458  CD  LYS D 457      10.855  18.967   3.186                  1K74
ATOM   2459  CE  LYS D 457      10.203  19.691   4.361                  1K74
ATOM   2460  NZ  LYS D 457       8.856  20.185   4.037                  1K74
ATOM   2461  HZ1 LYS D 457       8.238  19.434   3.766                  1K74
ATOM   2462  HZ2 LYS D 457       8.458  20.596   4.869                  1K74
ATOM   2463  HZ3 LYS D 457       8.867  20.899   3.322                  1K74
ATOM   2464  C   LYS D 457      14.747  18.051   5.341                  1K74
ATOM   2465  O   LYS D 457      15.318  18.902   4.663                  1K74
ATOM   2466  N   LYS D 458      14.791  17.987   6.675                  1K74
ATOM   2467  H   LYS D 458      14.285  17.213   7.089                  1K74
ATOM   2468  CA  LYS D 458      15.598  18.826   7.540                  1K74
ATOM   2469  CB  LYS D 458      15.015  18.781   8.950                  1K74
ATOM   2470  CG  LYS D 458      13.787  19.687   8.977                  1K74
ATOM   2471  CD  LYS D 458      13.245  19.610  10.399                  1K74
ATOM   2472  CE  LYS D 458      11.963  20.431  10.507                  1K74
ATOM   2473  NZ  LYS D 458      11.411  20.483  11.870                  1K74
ATOM   2474  HZ1 LYS D 458      12.080  20.911  12.494                  1K74
ATOM   2475  HZ2 LYS D 458      10.532  20.982  11.872                  1K74
ATOM   2476  HZ3 LYS D 458      11.259  19.536  12.188                  1K74
ATOM   2477  C   LYS D 458      17.036  18.324   7.551                  1K74
ATOM   2478  O   LYS D 458      17.887  19.185   7.343                  1K74
ATOM   2479  N   THR D 459      17.320  17.039   7.775                  1K74
ATOM   2480  H   THR D 459      16.606  16.322   7.826                  1K74
ATOM   2481  CA  THR D 459      18.625  16.437   7.977                  1K74
ATOM   2482  CB  THR D 459      18.543  15.058   8.629                  1K74
ATOM   2483  CG2 THR D 459      18.275  15.209  10.125                  1K74
ATOM   2484  OG1 THR D 459      17.569  14.101   8.222                  1K74
ATOM   2485  HG1 THR D 459      17.779  13.267   8.643                  1K74
ATOM   2486  C   THR D 459      19.335  16.289   6.636                  1K74
ATOM   2487  O   THR D 459      20.528  15.999   6.659                  1K74
ATOM   2488  N   GLU D 460      18.870  16.429   5.393                  1K74
ATOM   2489  H   GLU D 460      17.899  16.720   5.385                  1K74
ATOM   2490  CA  GLU D 460      19.249  16.084   4.036                  1K74
ATOM   2491  CB  GLU D 460      18.759  14.742   3.496                  1K74
ATOM   2492  CG  GLU D 460      18.681  13.418   4.252                  1K74
ATOM   2493  CD  GLU D 460      19.922  12.993   5.023                  1K74
ATOM   2494  OE1 GLU D 460      21.121  12.942   4.690                  1K74
ATOM   2495  OE2 GLU D 460      19.894  12.582   6.206                  1K74
ATOM   2496  C   GLU D 460      18.673  17.185   3.158                  1K74
ATOM   2497  O   GLU D 460      17.488  17.370   2.883                  1K74
ATOM   2498  N   THR D 461      19.699  17.930   2.735                  1K74
ATOM   2499  H   THR D 461      20.702  17.903   2.873                  1K74
ATOM   2500  CA  THR D 461      19.579  19.055   1.826                  1K74
ATOM   2501  CB  THR D 461      20.769  19.926   1.431                  1K74
ATOM   2502  CG2 THR D 461      20.890  21.064   2.440                  1K74
ATOM   2503  OG1 THR D 461      22.017  19.241   1.410                  1K74
ATOM   2504  HG1 THR D 461      22.805  19.748   1.206                  1K74
ATOM   2505  C   THR D 461      19.064  18.691   0.438                  1K74
ATOM   2506  O   THR D 461      18.217  19.299  -0.215                  1K74
ATOM   2507  N   ASP D 462      19.433  17.627  -0.281                  1K74
ATOM   2508  H   ASP D 462      20.078  17.094   0.295                  1K74
ATOM   2509  CA  ASP D 462      19.156  16.895  -1.502                  1K74
ATOM   2510  CB  ASP D 462      20.541  16.362  -1.859                  1K74
ATOM   2511  CG  ASP D 462      21.236  15.095  -1.388                  1K74
ATOM   2512  OD1 ASP D 462      21.582  15.358  -0.217                  1K74
ATOM   2513  OD2 ASP D 462      21.489  13.984  -1.900                  1K74
ATOM   2514  C   ASP D 462      18.125  15.814  -1.189                  1K74
ATOM   2515  O   ASP D 462      18.184  14.627  -1.505                  1K74
ATOM   2516  N   MET D 463      16.988  16.051  -0.525                  1K74
ATOM   2517  H   MET D 463      16.968  16.996  -0.161                  1K74
ATOM   2518  CA  MET D 463      15.817  15.305  -0.100                  1K74
ATOM   2519  CB  MET D 463      14.803  16.112   0.711                  1K74
ATOM   2520  CG  MET D 463      13.923  15.232   1.594                  1K74
ATOM   2521  SD  MET D 463      12.596  14.213   0.903                  1K74
ATOM   2522  CE  MET D 463      11.158  14.966   1.699                  1K74
ATOM   2523  LP1 MET D 463      12.882  13.622   0.730                  1K74
ATOM   2524  LP2 MET D 463      12.103  14.681   0.882                  1K74
ATOM   2525  C   MET D 463      15.126  14.788  -1.357                  1K74
ATOM   2526  O   MET D 463      15.190  13.625  -0.968                  1K74
ATOM   2527  N   SER D 464      14.708  15.544  -2.375                  1K74
ATOM   2528  H   SER D 464      14.815  16.527  -2.162                  1K74
ATOM   2529  CA  SER D 464      14.213  15.320  -3.717                  1K74
ATOM   2530  CB  SER D 464      15.386  15.048  -4.654                  1K74
ATOM   2531  OG  SER D 464      16.378  14.037  -4.538                  1K74
ATOM   2532  HG  SER D 464      17.239  13.676  -4.729                  1K74
ATOM   2533  C   SER D 464      13.271  14.124  -3.749                  1K74
ATOM   2534  O   SER D 464      13.330  12.897  -3.671                  1K74
ATOM   2535  N   LEU D 465      12.068  14.678  -3.913                  1K74
ATOM   2536  H   LEU D 465      11.831  15.628  -4.168                  1K74
ATOM   2537  CA  LEU D 465      10.839  13.909  -3.990                  1K74
ATOM   2538  CB  LEU D 465       9.677  14.287  -3.079                  1K74
ATOM   2539  CG  LEU D 465       9.135  13.122  -2.257                  1K74
ATOM   2540  CD1 LEU D 465       9.932  12.217  -1.322                  1K74
ATOM   2541  CD2 LEU D 465       8.078  13.715  -1.329                  1K74
ATOM   2542  C   LEU D 465      10.334  14.025  -5.422                  1K74
ATOM   2543  O   LEU D 465      10.382  15.006  -6.162                  1K74
ATOM   2544  N   HIS D 466       9.758  13.033  -6.105                  1K74
ATOM   2545  H   HIS D 466       9.780  12.211  -5.509                  1K74
ATOM   2546  CA  HIS D 466       8.963  12.701  -7.271                  1K74
ATOM   2547  CB  HIS D 466       8.451  11.265  -7.343                  1K74
ATOM   2548  CG  HIS D 466       8.073  10.854  -8.738                  1K74
ATOM   2549  ND1 HIS D 466       8.531  10.265  -9.904                  1K74
ATOM   2550  HD1 HIS D 466       9.376   9.728  -9.769                  1K74
ATOM   2551  CE1 HIS D 466       7.704  10.233 -10.961                  1K74
ATOM   2552  NE2 HIS D 466       6.645  11.000 -10.694                  1K74
ATOM   2553  CD2 HIS D 466       6.842  11.042  -9.319                  1K74
ATOM   2554  C   HIS D 466       7.774  13.654  -7.203                  1K74
ATOM   2555  O   HIS D 466       7.051  13.616  -6.208                  1K74
ATOM   2556  N   PRO D 467       7.664  14.437  -8.281                  1K74
ATOM   2557  CA  PRO D 467       6.638  15.450  -8.439                  1K74
ATOM   2558  CD  PRO D 467       8.304  14.618  -9.569                  1K74
ATOM   2559  CG  PRO D 467       7.341  14.803 -10.736                  1K74
ATOM   2560  CB  PRO D 467       6.701  15.904  -9.894                  1K74
ATOM   2561  C   PRO D 467       5.212  15.001  -8.150                  1K74
ATOM   2562  O   PRO D 467       4.631  15.865  -7.500                  1K74
ATOM   2563  N   LEU D 468       4.700  13.827  -8.535                  1K74
ATOM   2564  H   LEU D 468       5.384  13.244  -9.000                  1K74
ATOM   2565  CA  LEU D 468       3.475  13.129  -8.191                  1K74
ATOM   2566  CB  LEU D 468       3.285  11.695  -8.684                  1K74
ATOM   2567  CG  LEU D 468       1.931  11.017  -8.485                  1K74
ATOM   2568  CD1 LEU D 468       0.590  11.670  -8.810                  1K74
ATOM   2569  CD2 LEU D 468       1.965   9.766  -9.357                  1K74
ATOM   2570  C   LEU D 468       3.369  13.057  -6.671                  1K74
ATOM   2571  O   LEU D 468       2.345  13.501  -6.154                  1K74
ATOM   2572  N   LEU D 469       4.349  12.563  -5.910                  1K74
ATOM   2573  H   LEU D 469       5.242  12.469  -6.377                  1K74
ATOM   2574  CA  LEU D 469       4.461  12.429  -4.471                  1K74
ATOM   2575  CB  LEU D 469       5.682  11.630  -4.027                  1K74
ATOM   2576  CG  LEU D 469       5.262  10.219  -4.418                  1K74
ATOM   2577  CD1 LEU D 469       6.351   9.444  -3.691                  1K74
ATOM   2578  CD2 LEU D 469       4.115   9.220  -4.323                  1K74
ATOM   2579  C   LEU D 469       4.569  13.841  -3.919                  1K74
ATOM   2580  O   LEU D 469       3.869  13.832  -2.909                  1K74
ATOM   2581  N   GLN D 470       5.192  14.962  -4.283                  1K74
ATOM   2582  H   GLN D 470       5.600  14.675  -5.164                  1K74
ATOM   2583  CA  GLN D 470       5.159  16.345  -3.850                  1K74
ATOM   2584  CB  GLN D 470       6.157  17.078  -4.738                  1K74
ATOM   2585  CG  GLN D 470       7.603  16.815  -4.325                  1K74
ATOM   2586  CD  GLN D 470       8.251  18.023  -4.983                  1K74
ATOM   2587  OE1 GLN D 470       8.134  19.243  -5.041                  1K74
ATOM   2588  NE2 GLN D 470       9.272  17.572  -5.715                  1K74
ATOM   2589  HE21GLN D 470       9.584  16.627  -5.907                  1K74
ATOM   2590  HE22GLN D 470       9.854  18.246  -6.195                  1K74
ATOM   2591  C   GLN D 470       3.742  16.871  -4.041                  1K74
ATOM   2592  O   GLN D 470       3.521  17.426  -2.968                  1K74
ATOM   2593  N   GLU D 471       2.976  16.721  -5.124                  1K74
ATOM   2594  H   GLU D 471       3.530  16.188  -5.784                  1K74
ATOM   2595  CA  GLU D 471       1.585  17.100  -5.281                  1K74
ATOM   2596  CB  GLU D 471       1.314  16.563  -6.682                  1K74
ATOM   2597  CG  GLU D 471      -0.037  17.094  -7.153                  1K74
ATOM   2598  CD  GLU D 471      -0.317  16.584  -8.558                  1K74
ATOM   2599  OE1 GLU D 471       0.451  16.964  -9.468                  1K74
ATOM   2600  OE2 GLU D 471      -1.301  15.831  -8.722                  1K74
ATOM   2601  C   GLU D 471       0.700  16.466  -4.215                  1K74
ATOM   2602  O   GLU D 471      -0.040  17.269  -3.649                  1K74
ATOM   2603  N   ILE D 472       0.805  15.154  -3.982                  1K74
ATOM   2604  H   ILE D 472       1.504  14.656  -4.522                  1K74
ATOM   2605  CA  ILE D 472       0.052  14.326  -3.060                  1K74
ATOM   2606  CB  ILE D 472       0.153  12.804  -3.002                  1K74
ATOM   2607  CG2 ILE D 472      -0.614  11.903  -2.037                  1K74
ATOM   2608  CG1 ILE D 472      -0.247  12.095  -4.292                  1K74
ATOM   2609  CD  ILE D 472       0.138  10.911  -5.163                  1K74
ATOM   2610  C   ILE D 472       0.491  14.839  -1.693                  1K74
ATOM   2611  O   ILE D 472      -0.495  15.171  -1.037                  1K74
ATOM   2612  N   TYR D 473       1.731  14.953  -1.212                  1K74
ATOM   2613  H   TYR D 473       2.348  14.745  -1.988                  1K74
ATOM   2614  CA  TYR D 473       2.174  15.314   0.120                  1K74
ATOM   2615  CB  TYR D 473       3.651  14.927   0.185                  1K74
ATOM   2616  CG  TYR D 473       3.735  13.481   0.614                  1K74
ATOM   2617  CD1 TYR D 473       3.108  12.930   1.745                  1K74
ATOM   2618  CE1 TYR D 473       3.211  11.570   2.082                  1K74
ATOM   2619  CZ  TYR D 473       4.030  10.777   1.258                  1K74
ATOM   2620  OH  TYR D 473       4.369   9.523   1.670                  1K74
ATOM   2621  HH  TYR D 473       3.770   9.211   2.351                  1K74
ATOM   2622  CE2 TYR D 473       4.643  11.248   0.083                  1K74
ATOM   2623  CD2 TYR D 473       4.554  12.631  -0.151                  1K74
ATOM   2624  C   TYR D 473       1.982  16.805   0.365                  1K74
ATOM   2625  O   TYR D 473       1.977  16.927   1.589                  1K74
ATOM   2626  N   LYS D 474       1.840  17.787  -0.532                  1K74
ATOM   2627  H   LYS D 474       1.821  17.431  -1.481                  1K74
ATOM   2628  CA  LYS D 474       1.665  19.213  -0.332                  1K74
ATOM   2629  CB  LYS D 474       1.781  19.971  -1.652                  1K74
ATOM   2630  CG  LYS D 474       1.866  21.454  -1.298                  1K74
ATOM   2631  CD  LYS D 474       2.018  22.312  -2.549                  1K74
ATOM   2632  CE  LYS D 474       0.739  22.502  -3.361                  1K74
ATOM   2633  NZ  LYS D 474       0.989  23.468  -4.441                  1K74
ATOM   2634  HZ1 LYS D 474       1.766  23.189  -5.023                  1K74
ATOM   2635  HZ2 LYS D 474       0.159  23.541  -5.012                  1K74
ATOM   2636  HZ3 LYS D 474       1.172  24.371  -4.027                  1K74
ATOM   2637  C   LYS D 474       0.270  19.328   0.273                  1K74
ATOM   2638  O   LYS D 474      -0.700  19.004  -0.411                  1K74
ATOM   2639  N   ASP D 475       0.259  19.777   1.531                  1K74
ATOM   2640  H   ASP D 475       1.147  19.975   1.974                  1K74
ATOM   2641  CA  ASP D 475      -0.829  20.056   2.455                  1K74
ATOM   2642  CB  ASP D 475      -1.517  21.330   1.957                  1K74
ATOM   2643  CG  ASP D 475      -0.794  22.598   1.534                  1K74
ATOM   2644  OD1 ASP D 475      -0.255  23.108   2.540                  1K74
ATOM   2645  OD2 ASP D 475      -0.703  23.093   0.389                  1K74
ATOM   2646  C   ASP D 475      -1.815  18.890   2.503                  1K74
ATOM   2647  O   ASP D 475      -2.974  18.810   2.095                  1K74
ATOM   2648  N   LEU D 476      -1.225  17.834   3.076                  1K74
ATOM   2649  H   LEU D 476      -0.280  17.894   3.432                  1K74
ATOM   2650  CA  LEU D 476      -1.957  16.592   3.247                  1K74
ATOM   2651  CB  LEU D 476      -0.987  15.480   2.849                  1K74
ATOM   2652  CG  LEU D 476      -1.659  14.109   2.909                  1K74
ATOM   2653  CD1 LEU D 476      -2.608  13.813   1.751                  1K74
ATOM   2654  CD2 LEU D 476      -0.648  12.965   2.907                  1K74
ATOM   2655  C   LEU D 476      -2.366  16.586   4.716                  1K74
ATOM   2656  O   LEU D 476      -3.214  17.410   5.055                  1K74
ATOM   2657  N   TYR D 477      -2.092  15.918   5.838                  1K74
ATOM   2658  H   TYR D 477      -1.429  15.191   5.587                  1K74
ATOM   2659  CA  TYR D 477      -2.316  15.630   7.245                  1K74
ATOM   2660  CB  TYR D 477      -3.728  15.052   7.140                  1K74
ATOM   2661  CG  TYR D 477      -4.196  13.692   6.681                  1K74
ATOM   2662  CD1 TYR D 477      -3.398  12.987   5.764                  1K74
ATOM   2663  CE1 TYR D 477      -3.473  11.619   5.458                  1K74
ATOM   2664  CZ  TYR D 477      -4.488  10.970   6.182                  1K74
ATOM   2665  OH  TYR D 477      -4.401   9.676   5.768                  1K74
ATOM   2666  HH  TYR D 477      -4.040   9.182   5.032                  1K74
ATOM   2667  CE2 TYR D 477      -5.387  11.509   7.120                  1K74
ATOM   2668  CD2 TYR D 477      -5.123  12.871   7.346                  1K74
ATOM   2669  C   TYR D 477      -1.325  14.654   7.867                  1K74
ATOM   2670  O   TYR D 477      -0.396  14.035   7.350                  1K74
ATOM   2671  OXT TYR D 477      -1.478  14.449   9.068                  1K74
HETATM    1  N   544   401       7.663   5.600   0.355  1.00 29.15           N
HETATM    2  CA  544   401       6.278   5.806  -0.241  1.00 27.15           C
HETATM    3  C   544   401       5.689   7.200  -0.156  1.00 28.65           C
HETATM    4  CB  544   401       5.286   4.689   0.254  1.00 25.28           C
HETATM    5  CG  544   401       5.842   3.268   0.056  1.00 24.53           C
HETATM    6  CD1 544   401       6.375   2.548   1.187  1.00 25.49           C
HETATM    7  CD2 544   401       5.837   2.656  -1.240  1.00 22.72           C
HETATM    8  CE1 544   401       6.898   1.238   1.009  1.00 24.25           C
HETATM    9  CE2 544   401       6.352   1.369  -1.403  1.00 22.27           C
HETATM   10  CZ  544   401       6.897   0.626  -0.272  1.00 23.60           C
HETATM   11  OH  544   401       7.446  -0.684  -0.332  1.00 23.66           O
HETATM   12  O1  544   401       5.975   7.946   0.812  1.00 30.67           O
HETATM   13  O2  544   401       4.933   7.559  -1.079  1.00 28.51           O
HETATM   14  C1A 544   401       8.920   6.271   0.121  1.00 27.69           C
HETATM   15  C1B 544   401       9.112   7.432  -0.846  1.00 28.30           C
HETATM   16  C1F 544   401      10.025   5.812   0.828  1.00 27.78           C
HETATM   17  C1G 544   401      10.098   4.645   1.884  1.00 27.40           C
HETATM   18  O1G 544   401       9.049   4.046   2.184  1.00 30.25           O
HETATM   19  C1H 544   401      11.328   4.247   2.525  1.00 25.80           C
HETATM   20  C1I 544   401      11.529   2.849   2.846  1.00 26.48           C
HETATM   21  C1J 544   401      12.717   2.412   3.478  1.00 23.90           C
HETATM   22  C1K 544   401      13.730   3.356   3.801  1.00 27.21           C
HETATM   23  C1L 544   401      13.554   4.741   3.485  1.00 27.40           C
HETATM   24  C1M 544   401      12.363   5.183   2.852  1.00 26.84           C
HETATM   25  C3A 544   401       7.336  -1.451  -1.568  1.00 23.57           C
HETATM   26  C3B 544   401       8.296  -2.641  -1.468  1.00 28.00           C
HETATM   27  C3C 544   401       9.790  -2.216  -1.547  1.00 28.71           C
HETATM   28  C3D 544   401      10.680  -1.853  -0.488  1.00 31.34           C
HETATM   29  C3E 544   401      10.413  -1.781   1.028  1.00 30.99           C
HETATM   30  O3F 544   401      11.896  -1.564  -1.039  1.00 31.84           O
HETATM   31  C3G 544   401      11.785  -1.722  -2.414  1.00 32.78           C
HETATM   32  N3H 544   401      10.476  -2.142  -2.758  1.00 31.07           N
HETATM   33  C3I 544   401      12.849  -1.521  -3.305  1.00 36.41           C
HETATM   34  C3J 544   401      14.119  -1.108  -2.796  1.00 39.80           C
HETATM   35  C3K 544   401      15.213  -0.882  -3.674  1.00 41.27           C
HETATM   36  C3L 544   401      15.056  -1.067  -5.073  1.00 39.43           C
HETATM   37  C3M 544   401      13.807  -1.470  -5.599  1.00 39.39           C
HETATM   38  C3N 544   401      12.709  -1.697  -4.732  1.00 38.77           C
HETATM    1  C1  ACN     1      21.734   9.214   2.430   1.0   0.0
HETATM    2  C2  ACN     1      22.090   9.923   1.203   1.0   0.0
HETATM    3  N   ACN     1      22.369  10.484   0.226   1.0   0.0
HETATM    4  H1  ACN     1      22.628   8.835   2.902   1.0   0.0
HETATM    5  H2  ACN     1      21.229   9.890   3.104   1.0   0.0
HETATM    6  H3  ACN     1      21.078   8.389   2.190   1.0   0.0
HETATM    7  C1  ACN     2      -0.013  -3.806  -5.561   1.0   0.0
HETATM    8  C2  ACN     2       0.086  -4.287  -6.935   1.0   0.0
HETATM    9  N   ACN     2       0.162  -4.670  -8.028   1.0   0.0
HETATM   10  H1  ACN     2      -0.470  -4.566  -4.946   1.0   0.0
HETATM   11  H2  ACN     2       0.976  -3.583  -5.187   1.0   0.0
HETATM   12  H3  ACN     2      -0.616  -2.910  -5.540   1.0   0.0
HETATM   13  C1  ACN     3       6.760   7.456  -0.006   1.0   0.0
HETATM   14  C2  ACN     3       8.125   7.071  -0.353   1.0   0.0
HETATM   15  N   ACN     3       9.210   6.766  -0.630   1.0   0.0
HETATM   16  H1  ACN     3       6.344   6.734   0.681   1.0   0.0
HETATM   17  H2  ACN     3       6.771   8.430   0.459   1.0   0.0
HETATM   18  H3  ACN     3       6.156   7.490  -0.901   1.0   0.0
HETATM   25  C1  ACN     4       5.961  15.373   3.632   1.0   0.0
HETATM   26  C2  ACN     4       6.835  16.538   3.731   1.0   0.0
HETATM   27  N   ACN     4       7.533  17.462   3.814   1.0   0.0
HETATM   28  H1  ACN     4       4.944  15.696   3.465   1.0   0.0
HETATM   29  H2  ACN     4       6.282  14.750   2.811   1.0   0.0
HETATM   30  H3  ACN     4       6.013  14.809   4.552   1.0   0.0
HETATM   43  C1  ACN     5      12.342   9.743  -7.534   1.0   0.0
HETATM   44  C2  ACN     5      11.211   8.850  -7.769   1.0   0.0
HETATM   45  N   ACN     5      10.311   8.139  -7.949   1.0   0.0
HETATM   46  H1  ACN     5      13.033   9.271  -6.850   1.0   0.0
HETATM   47  H2  ACN     5      12.840   9.947  -8.470   1.0   0.0
HETATM   48  H3  ACN     5      11.986  10.667  -7.103   1.0   0.0
HETATM    1  C   ACT     1       9.207   7.838  -0.021   1.0   0.0
HETATM    2  O   ACT     1       9.966   8.441  -0.777   1.0   0.0
HETATM    3  CH1 ACT     1       9.728   6.820   0.979   1.0   0.0
HETATM    4  CH2 ACT     1       7.706   8.080  -0.043   1.0   0.0
HETATM    9  C   ACT     2      12.782  -1.192  -6.140   1.0   0.0
HETATM   10  O   ACT     2      13.849  -0.582  -6.061   1.0   0.0
HETATM   11  CH1 ACT     2      12.331  -2.144  -5.046   1.0   0.0
HETATM   12  CH2 ACT     2      11.856  -1.018  -7.332   1.0   0.0
HETATM   13  C   ACT     3       7.218  15.833   3.285   1.0   0.0
HETATM   14  O   ACT     3       8.169  16.212   3.967   1.0   0.0
HETATM   15  CH1 ACT     3       7.248  15.914   1.768   1.0   0.0
HETATM   16  CH2 ACT     3       5.959  15.263   3.916   1.0   0.0
HETATM   17  C   ACT     4      -3.624  11.908  -6.521   1.0   0.0
HETATM   18  O   ACT     4      -3.438  11.103  -5.609   1.0   0.0
HETATM   19  CH1 ACT     4      -3.613  13.407  -6.272   1.0   0.0
HETATM   20  CH2 ACT     4      -3.878  11.447  -7.946   1.0   0.0
HETATM   21  C   ACT     5       5.917   4.962   0.672   1.0   0.0
HETATM   22  O   ACT     5       5.926   4.671   1.866   1.0   0.0
HETATM   23  CH1 ACT     5       5.858   3.885  -0.398   1.0   0.0
HETATM   24  CH2 ACT     5       5.968   6.407   0.203   1.0   0.0
HETATM    1  C   BUT     1      22.370  10.718   1.758   1.0   0.0
HETATM    2  C1  BUT     1      23.454  10.644   0.640   1.0   0.0
HETATM    3  C2  BUT     1      21.935   9.289   2.220   1.0   0.0
HETATM    4  C3  BUT     1      21.139  11.543   1.265   1.0   0.0
HETATM    5  O   BUT     1      22.944  11.386   2.876   1.0   0.0
HETATM    6  H1  BUT     1      23.773  11.638   0.354   1.0   0.0
HETATM    7  H2  BUT     1      23.060  10.150  -0.237   1.0   0.0
HETATM    8  H3  BUT     1      24.320  10.095   0.986   1.0   0.0
HETATM    9  H4  BUT     1      21.205   9.355   3.017   1.0   0.0
HETATM   10  H5  BUT     1      22.787   8.735   2.590   1.0   0.0
HETATM   11  H6  BUT     1      21.499   8.735   1.399   1.0   0.0
HETATM   12  H7  BUT     1      20.398  11.621   2.049   1.0   0.0
HETATM   13  H8  BUT     1      20.680  11.071   0.407   1.0   0.0
HETATM   14  H9  BUT     1      21.439  12.544   0.984   1.0   0.0
HETATM   15  HO  BUT     1      22.280  11.488   3.566   1.0   0.0
HETATM   16  C   BUT     2       8.801   7.130   0.061   1.0   0.0
HETATM   17  C1  BUT     2       7.395   6.453   0.131   1.0   0.0
HETATM   18  C2  BUT     2       9.624   6.888   1.361   1.0   0.0
HETATM   19  C3  BUT     2       8.655   8.651  -0.238   1.0   0.0
HETATM   20  O   BUT     2       9.525   6.538  -1.005   1.0   0.0
HETATM   21  H1  BUT     2       6.862   6.594  -0.800   1.0   0.0
HETATM   22  H2  BUT     2       6.805   6.877   0.931   1.0   0.0
HETATM   23  H3  BUT     2       7.497   5.390   0.304   1.0   0.0
HETATM   24  H4  BUT     2      10.607   7.327   1.274   1.0   0.0
HETATM   25  H5  BUT     2       9.743   5.829   1.544   1.0   0.0
HETATM   26  H6  BUT     2       9.130   7.334   2.209   1.0   0.0
HETATM   27  H7  BUT     2       9.629   9.112  -0.325   1.0   0.0
HETATM   28  H8  BUT     2       8.107   9.142   0.552   1.0   0.0
HETATM   29  H9  BUT     2       8.125   8.806  -1.165   1.0   0.0
HETATM   30  HO  BUT     2      10.402   6.925  -1.072   1.0   0.0
HETATM   61  C   BUT     3      -4.026  13.052  -7.023   1.0   0.0
HETATM   62  C1  BUT     3      -3.927  13.323  -8.556   1.0   0.0
HETATM   63  C2  BUT     3      -3.203  14.105  -6.215   1.0   0.0
HETATM   64  C3  BUT     3      -3.548  11.605  -6.690   1.0   0.0
HETATM   65  O   BUT     3      -5.394  13.170  -6.648   1.0   0.0
HETATM   66  H1  BUT     3      -4.525  12.609  -9.106   1.0   0.0
HETATM   67  H2  BUT     3      -2.901  13.244  -8.892   1.0   0.0
HETATM   68  H3  BUT     3      -4.288  14.317  -8.786   1.0   0.0
HETATM   69  H4  BUT     3      -3.300  13.930  -5.153   1.0   0.0
HETATM   70  H5  BUT     3      -3.558  15.105  -6.427   1.0   0.0
HETATM   71  H6  BUT     3      -2.154  14.052  -6.475   1.0   0.0
HETATM   72  H7  BUT     3      -3.647  11.406  -5.632   1.0   0.0
HETATM   73  H8  BUT     3      -2.512  11.476  -6.969   1.0   0.0
HETATM   74  H9  BUT     3      -4.140  10.876  -7.228   1.0   0.0
HETATM   75  HO  BUT     3      -5.500  13.026  -5.704   1.0   0.0
HETATM   76  C   BUT     4       6.768  16.603   3.288   1.0   0.0
HETATM   77  C1  BUT     4       5.929  17.833   3.758   1.0   0.0
HETATM   78  C2  BUT     4       7.083  16.698   1.761   1.0   0.0
HETATM   79  C3  BUT     4       6.015  15.279   3.622   1.0   0.0
HETATM   80  O   BUT     4       8.008  16.603   3.991   1.0   0.0
HETATM   81  H1  BUT     4       5.743  17.779   4.823   1.0   0.0
HETATM   82  H2  BUT     4       4.977  17.865   3.244   1.0   0.0
HETATM   83  H3  BUT     4       6.459  18.753   3.555   1.0   0.0
HETATM   84  H4  BUT     4       7.684  15.856   1.447   1.0   0.0
HETATM   85  H5  BUT     4       7.632  17.605   1.546   1.0   0.0
HETATM   86  H6  BUT     4       6.170  16.704   1.181   1.0   0.0
HETATM   87  H7  BUT     4       6.598  14.426   3.311   1.0   0.0
HETATM   88  H8  BUT     4       5.061  15.242   3.116   1.0   0.0
HETATM   89  H9  BUT     4       5.841  15.201   4.687   1.0   0.0
HETATM   90  HO  BUT     4       8.538  15.848   3.720   1.0   0.0
HETATM   91  C   BUT     5      11.436  -1.017  -7.192   1.0   0.0
HETATM   92  C1  BUT     5      11.566  -1.693  -8.590   1.0   0.0
HETATM   93  C2  BUT     5      12.477  -1.585  -6.176   1.0   0.0
HETATM   94  C3  BUT     5       9.988  -1.187  -6.635   1.0   0.0
HETATM   95  O   BUT     5      11.702   0.370  -7.368   1.0   0.0
HETATM   96  H1  BUT     5      10.862  -1.264  -9.289   1.0   0.0
HETATM   97  H2  BUT     5      11.373  -2.750  -8.526   1.0   0.0
HETATM   98  H3  BUT     5      12.559  -1.551  -8.985   1.0   0.0
HETATM   99  H4  BUT     5      12.394  -1.076  -5.225   1.0   0.0
HETATM  100  H5  BUT     5      13.482  -1.445  -6.546   1.0   0.0
HETATM  101  H6  BUT     5      12.315  -2.641  -6.012   1.0   0.0
HETATM  102  H7  BUT     5       9.890  -0.682  -5.684   1.0   0.0
HETATM  103  H8  BUT     5       9.751  -2.233  -6.494   1.0   0.0
HETATM  104  H9  BUT     5       9.265  -0.761  -7.318   1.0   0.0
HETATM  105  HO  BUT     5      11.569   0.835  -6.540   1.0   0.0
HETATM    1  C1  PHN     1       6.665   7.563  -0.259   1.0   0.0
HETATM    2  C2  PHN     1       7.439   6.403  -0.242   1.0   0.0
HETATM    3  C3  PHN     1       8.828   6.514  -0.160   1.0   0.0
HETATM    4  C4  PHN     1       9.437   7.767  -0.117   1.0   0.0
HETATM    5  C5  PHN     1       8.652   8.919  -0.142   1.0   0.0
HETATM    6  C6  PHN     1       7.262   8.824  -0.205   1.0   0.0
HETATM    7  O   PHN     1       5.292   7.459  -0.340   1.0   0.0
HETATM    8  HO  PHN     1       4.890   8.327  -0.239   1.0   0.0
HETATM    9  C1  PHN     2       7.761   8.687  -0.277   1.0   0.0
HETATM   10  C2  PHN     2       9.016   8.141  -0.002   1.0   0.0
HETATM   11  C3  PHN     2       9.107   6.792   0.343   1.0   0.0
HETATM   12  C4  PHN     2       7.957   6.004   0.410   1.0   0.0
HETATM   13  C5  PHN     2       6.710   6.559   0.124   1.0   0.0
HETATM   14  C6  PHN     2       6.604   7.907  -0.219   1.0   0.0
HETATM   15  O   PHN     2       7.666  10.018  -0.619   1.0   0.0
HETATM   16  HO  PHN     2       6.751  10.238  -0.802   1.0   0.0
HETATM   25  C1  PHN     3      21.942   8.983   2.889   1.0   0.0
HETATM   26  C2  PHN     3      20.851   9.766   2.511   1.0   0.0
HETATM   27  C3  PHN     3      21.029  10.777   1.566   1.0   0.0
HETATM   28  C4  PHN     3      22.285  10.997   1.001   1.0   0.0
HETATM   29  C5  PHN     3      23.370  10.208   1.387   1.0   0.0
HETATM   30  C6  PHN     3      23.205   9.199   2.337   1.0   0.0
HETATM   31  O   PHN     3      21.764   7.987   3.826   1.0   0.0
HETATM   32  HO  PHN     3      22.564   7.462   3.916   1.0   0.0
HETATM   33  C1  PHN     4       0.783  -4.106  -7.335   1.0   0.0
HETATM   34  C2  PHN     4       1.892  -4.611  -6.657   1.0   0.0
HETATM   35  C3  PHN     4       1.828  -4.775  -5.273   1.0   0.0
HETATM   36  C4  PHN     4       0.672  -4.426  -4.577   1.0   0.0
HETATM   37  C5  PHN     4      -0.422  -3.906  -5.267   1.0   0.0
HETATM   38  C6  PHN     4      -0.375  -3.740  -6.651   1.0   0.0
HETATM   39  O   PHN     4       0.858  -3.910  -8.693   1.0   0.0
HETATM   40  HO  PHN     4       0.162  -3.302  -8.963   1.0   0.0
HETATM   41  C1  PHN     5      11.926  -0.775  -6.981   1.0   0.0
HETATM   42  C2  PHN     5      12.864  -1.313  -6.098   1.0   0.0
HETATM   43  C3  PHN     5      12.421  -2.054  -5.001   1.0   0.0
HETATM   44  C4  PHN     5      11.056  -2.250  -4.790   1.0   0.0
HETATM   45  C5  PHN     5      10.128  -1.713  -5.682   1.0   0.0
HETATM   46  C6  PHN     5      10.557  -0.971  -6.783   1.0   0.0
HETATM   47  O   PHN     5      12.361  -0.034  -8.061   1.0   0.0
HETATM   48  HO  PHN     5      11.607   0.257  -8.579   1.0   0.0
HETATM    1  CH3 SES     1      18.085  -4.476 -11.959   1.0   0.0
HETATM    2  OT  SES     1      19.065  -5.206 -11.216   1.0   0.0
HETATM    3  HO  SES     1      18.913  -6.138 -11.300   1.0   0.0
HETATM    7  CH3 SES     2       6.592   7.533  -0.044   1.0   0.0
HETATM    8  OT  SES     2       5.390   7.857  -0.747   1.0   0.0
HETATM    9  HO  SES     2       4.777   8.283  -0.159   1.0   0.0
HETATM   10  CH3 SES     3      -0.006  -4.101  -6.823   1.0   0.0
HETATM   11  OT  SES     3       0.378  -4.202  -8.196   1.0   0.0
HETATM   12  HO  SES     3       0.330  -3.346  -8.609   1.0   0.0
HETATM   13  CH3 SES     4      21.705   8.675   2.435   1.0   0.0
HETATM   14  OT  SES     4      21.827   8.183   3.771   1.0   0.0
HETATM   15  HO  SES     4      22.242   7.328   3.769   1.0   0.0
HETATM   19  CH3 SES     5      11.792  -1.022  -7.244   1.0   0.0
HETATM   20  OT  SES     5      12.313   0.306  -7.339   1.0   0.0
HETATM   21  HO  SES     5      11.654   0.929  -7.058   1.0   0.0
HETATM    1  CH  THS     1       6.533   7.438   0.076   1.0   0.0
HETATM    2  CH1 THS     1       6.853   5.978  -0.192   1.0   0.0
HETATM    3  CH2 THS     1       7.753   8.306  -0.179   1.0   0.0
HETATM    4  OT  THS     1       5.438   7.859  -0.742   1.0   0.0
HETATM    5  HO  THS     1       4.788   8.299  -0.206   1.0   0.0
HETATM   11  CH  THS     2      11.815  -1.094  -7.045   1.0   0.0
HETATM   12  CH1 THS     2      12.579  -1.644  -5.852   1.0   0.0
HETATM   13  CH2 THS     2      10.317  -1.188  -6.801   1.0   0.0
HETATM   14  OT  THS     2      12.203   0.261  -7.296   1.0   0.0
HETATM   15  HO  THS     2      11.559   0.858  -6.934   1.0   0.0
HETATM   16  CH  THS     3       7.032  16.203   3.263   1.0   0.0
HETATM   17  CH1 THS     3       7.278  15.549   1.915   1.0   0.0
HETATM   18  CH2 THS     3       6.053  15.370   4.072   1.0   0.0
HETATM   19  OT  THS     3       8.266  16.365   3.970   1.0   0.0
HETATM   20  HO  THS     3       8.782  15.570   3.917   1.0   0.0
HETATM   21  CH  THS     4      22.047   8.847   2.563   1.0   0.0
HETATM   22  CH1 THS     4      20.925   9.820   2.247   1.0   0.0
HETATM   23  CH2 THS     4      23.370   9.585   2.657   1.0   0.0
HETATM   24  OT  THS     4      21.776   8.161   3.787   1.0   0.0
HETATM   25  HO  THS     4      22.292   7.364   3.835   1.0   0.0
HETATM   26  CH  THS     5      -3.977  13.123  -6.920   1.0   0.0
HETATM   27  CH1 THS     5      -3.361  14.184  -6.023   1.0   0.0
HETATM   28  CH2 THS     5      -3.553  11.736  -6.470   1.0   0.0
HETATM   29  OT  THS     5      -5.403  13.234  -6.911   1.0   0.0
HETATM   30  HO  THS     5      -5.725  13.291  -6.020   1.0   0.0
HETATM    1  C   URE     1      18.200  -4.561 -11.853   1.0   0.0
HETATM    2  O   URE     1      19.033  -5.276 -11.302   1.0   0.0
HETATM    3  N1  URE     1      16.900  -4.826 -11.838   1.0   0.0
HETATM    4  N2  URE     1      18.530  -3.456 -12.508   1.0   0.0
HETATM    5  H1  URE     1      16.462  -5.167 -11.006   1.0   0.0
HETATM    6  H2  URE     1      16.341  -4.692 -12.656   1.0   0.0
HETATM    7  H3  URE     1      17.942  -2.648 -12.483   1.0   0.0
HETATM    8  H4  URE     1      19.373  -3.419 -13.045   1.0   0.0
HETATM    9  C   URE     2       0.596  -4.211  -7.195   1.0   0.0
HETATM   10  O   URE     2       1.195  -4.766  -6.276   1.0   0.0
HETATM   11  N1  URE     2      -0.595  -3.649  -7.039   1.0   0.0
HETATM   12  N2  URE     2       1.094  -4.117  -8.423   1.0   0.0
HETATM   13  H1  URE     2      -0.821  -2.791  -7.502   1.0   0.0
HETATM   14  H2  URE     2      -1.287  -4.072  -6.454   1.0   0.0
HETATM   15  H3  URE     2       0.917  -3.306  -8.982   1.0   0.0
HETATM   16  H4  URE     2       1.657  -4.848  -8.807   1.0   0.0
HETATM   33  C   URE     3      21.483   8.707   2.439   1.0   0.0
HETATM   34  O   URE     3      21.118   9.836   2.123   1.0   0.0
HETATM   35  N1  URE     3      21.636   8.326   3.701   1.0   0.0
HETATM   36  N2  URE     3      21.750   7.763   1.545   1.0   0.0
HETATM   37  H1  URE     3      22.377   7.712   3.975   1.0   0.0
HETATM   38  H2  URE     3      20.997   8.654   4.396   1.0   0.0
HETATM   39  H3  URE     3      21.898   7.992   0.583   1.0   0.0
HETATM   40  H4  URE     3      21.816   6.805   1.822   1.0   0.0
HETATM   49  C   URE     4       6.565   7.578  -0.281   1.0   0.0
HETATM   50  O   URE     4       7.189   6.686  -0.852   1.0   0.0
HETATM   51  N1  URE     4       5.359   7.973  -0.674   1.0   0.0
HETATM   52  N2  URE     4       7.041   8.229   0.773   1.0   0.0
HETATM   53  H1  URE     4       4.617   8.089  -0.014   1.0   0.0
HETATM   54  H2  URE     4       5.167   8.172  -1.634   1.0   0.0
HETATM   55  H3  URE     4       6.433   8.528   1.510   1.0   0.0
HETATM   56  H4  URE     4       8.017   8.430   0.855   1.0   0.0
HETATM   57  C   URE     5       6.525  15.194   3.264   1.0   0.0
HETATM   58  O   URE     5       7.001  16.254   3.664   1.0   0.0
HETATM   59  N1  URE     5       5.695  14.459   3.994   1.0   0.0
HETATM   60  N2  URE     5       6.807  14.685   2.070   1.0   0.0
HETATM   61  H1  URE     5       5.968  14.141   4.903   1.0   0.0
HETATM   62  H2  URE     5       4.786  14.216   3.656   1.0   0.0
HETATM   63  H3  URE     5       6.371  15.044   1.245   1.0   0.0
HETATM   64  H4  URE     5       7.462  13.937   1.972   1.0   0.0
